# Supplementary material for: An efficient and ecofriendly synthesis of highly functionalized pyridones via a one-pot three-component reaction
Source: PubMed Central journal article supplement (PMC9092425; doi:10.1039/c8ra05690k), 2018-07-30
Supplement: RA-008-C8RA05690K-s001.pdf [file RA-008-C8RA05690K-s001.pdf]

## Supporting Information

### An Efficient and Ecofriendly Synthesis of Highly Functionalized Pyridones via a One-pot Three-Component Reaction

Hajar Hosseini, Mohammad Bayat\*

*Department of Chemistry, Faculty of Science, Imam Khomeini International University, Qazvin,*

*Iran*

bayat\_mo@yahoo.com

#### The Table of Contents

| Title                                                                                                       | Page  |
|-------------------------------------------------------------------------------------------------------------|-------|
| Title, author's name, address and table of contents                                                         | 1-2   |
| Experimental Section; General remarks                                                                       | 2     |
| <b>Figure 1.</b> Structure of all products <b>4a-l</b> , <b>5a-e</b> , <b>6a-e</b>                          | 3     |
| <sup>1</sup> H and <sup>13</sup> C NMR and IR and Mass spectrums of <b>4a</b>                               | 4-7   |
| <sup>1</sup> H and <sup>13</sup> C NMR and IR and Mass spectrums of <b>4b</b>                               | 8-11  |
| <sup>1</sup> H and D <sub>2</sub> O exchange and <sup>13</sup> C NMR and Mass spectrums of <b>4c</b>        | 12-14 |
| <sup>1</sup> H and D <sub>2</sub> O exchange and <sup>13</sup> C NMR and IR and Mass spectrums of <b>4d</b> | 15-18 |
| <sup>1</sup> H and <sup>13</sup> C NMR and IR and Mass spectrums of <b>4e</b>                               | 19-22 |
| <sup>1</sup> H and <sup>13</sup> C NMR and IR and Mass spectrums of <b>4f</b>                               | 23-26 |
| <sup>1</sup> H and <sup>13</sup> C NMR and IR and Mass spectrums of <b>4g</b>                               | 27-30 |
| <sup>1</sup> H and <sup>13</sup> C NMR spectrums of <b>4h</b>                                               | 31-32 |
| <sup>1</sup> H and <sup>13</sup> C NMR and Mass spectrums of <b>4i</b>                                      | 33-35 |
| <sup>1</sup> H and <sup>13</sup> C NMR and IR and Mass spectrums of <b>4j</b>                               | 36-39 |
| <sup>1</sup> H and <sup>13</sup> C NMR and IR spectrums of <b>4k</b>                                        | 40-42 |

|                                                                                                             |       |
|-------------------------------------------------------------------------------------------------------------|-------|
| <sup>1</sup> H and <sup>13</sup> C NMR and IR spectrums of <b>4l</b>                                        | 43-45 |
| <sup>1</sup> H and D <sub>2</sub> O exchange and <sup>13</sup> C NMR and IR and Mass spectrums of <b>5a</b> | 46-49 |
| <sup>1</sup> H and <sup>13</sup> C NMR and IR and Mass spectrums of <b>5b</b>                               | 50-53 |
| <sup>1</sup> H and <sup>13</sup> C NMR and IR and Mass spectrums of <b>5c</b>                               | 54-57 |
| <sup>1</sup> H and <sup>13</sup> C NMR and IR and Mass spectrums of <b>5d</b>                               | 58-61 |
| <sup>1</sup> H and <sup>13</sup> C NMR spectrums of <b>5e</b>                                               | 62-63 |
| <sup>1</sup> H and <sup>13</sup> C NMR and IR and Mass spectrums of <b>6a</b>                               | 64-67 |
| <sup>1</sup> H and <sup>13</sup> C NMR and IR spectrums of <b>6b</b>                                        | 68-70 |
| <sup>1</sup> H and <sup>13</sup> C NMR spectrums of <b>6c</b>                                               | 71-72 |
| <sup>1</sup> H and <sup>13</sup> C NMR spectrums of <b>6d</b>                                               | 73-74 |
| <sup>1</sup> H and <sup>13</sup> C NMR and Mass spectrums of <b>6e</b>                                      | 75-77 |

## Experimental Section

### General remarks:

All commercially available reagents and other solvents were purchased and used without further purification. The NMR spectra were recorded with a Bruker DRX-300 Avance instrument (300 MHz for <sup>1</sup>H and 75.4 MHz for <sup>13</sup>C) with DMSO-*d*<sub>6</sub> as solvent. Chemical shifts are given in ppm ( $\delta$ ), and coupling constant (*J*) are reported in hertz (Hz). Melting points were measured with an electrothermal 9100 apparatus. Mass spectra were recorded with an Agilent 5975C VL MSD with Triple-Axis Detector operating at an ionization potential of 70 eV. IR spectra were measured with Bruker Tensor 27 spectrometer ( $\bar{\nu}$  in cm<sup>-1</sup>). Elemental analyses for C, H and N were performed using a PerkinElmer 2004 series [II] CHN elemental analyzer. All NMR spectra at room temperature were determined in DMSO-*d*<sub>6</sub>. Chemical shifts are reported in parts per million ( $\delta$ ). Coupling constants (*J* values) are reported in hertz (Hz), and spin multiplicities are indicated by the following symbols: s (singlet), d (doublet), t (triplet), q (quartet), m (multiplet). All chemicals were purchased and were used without further purification.

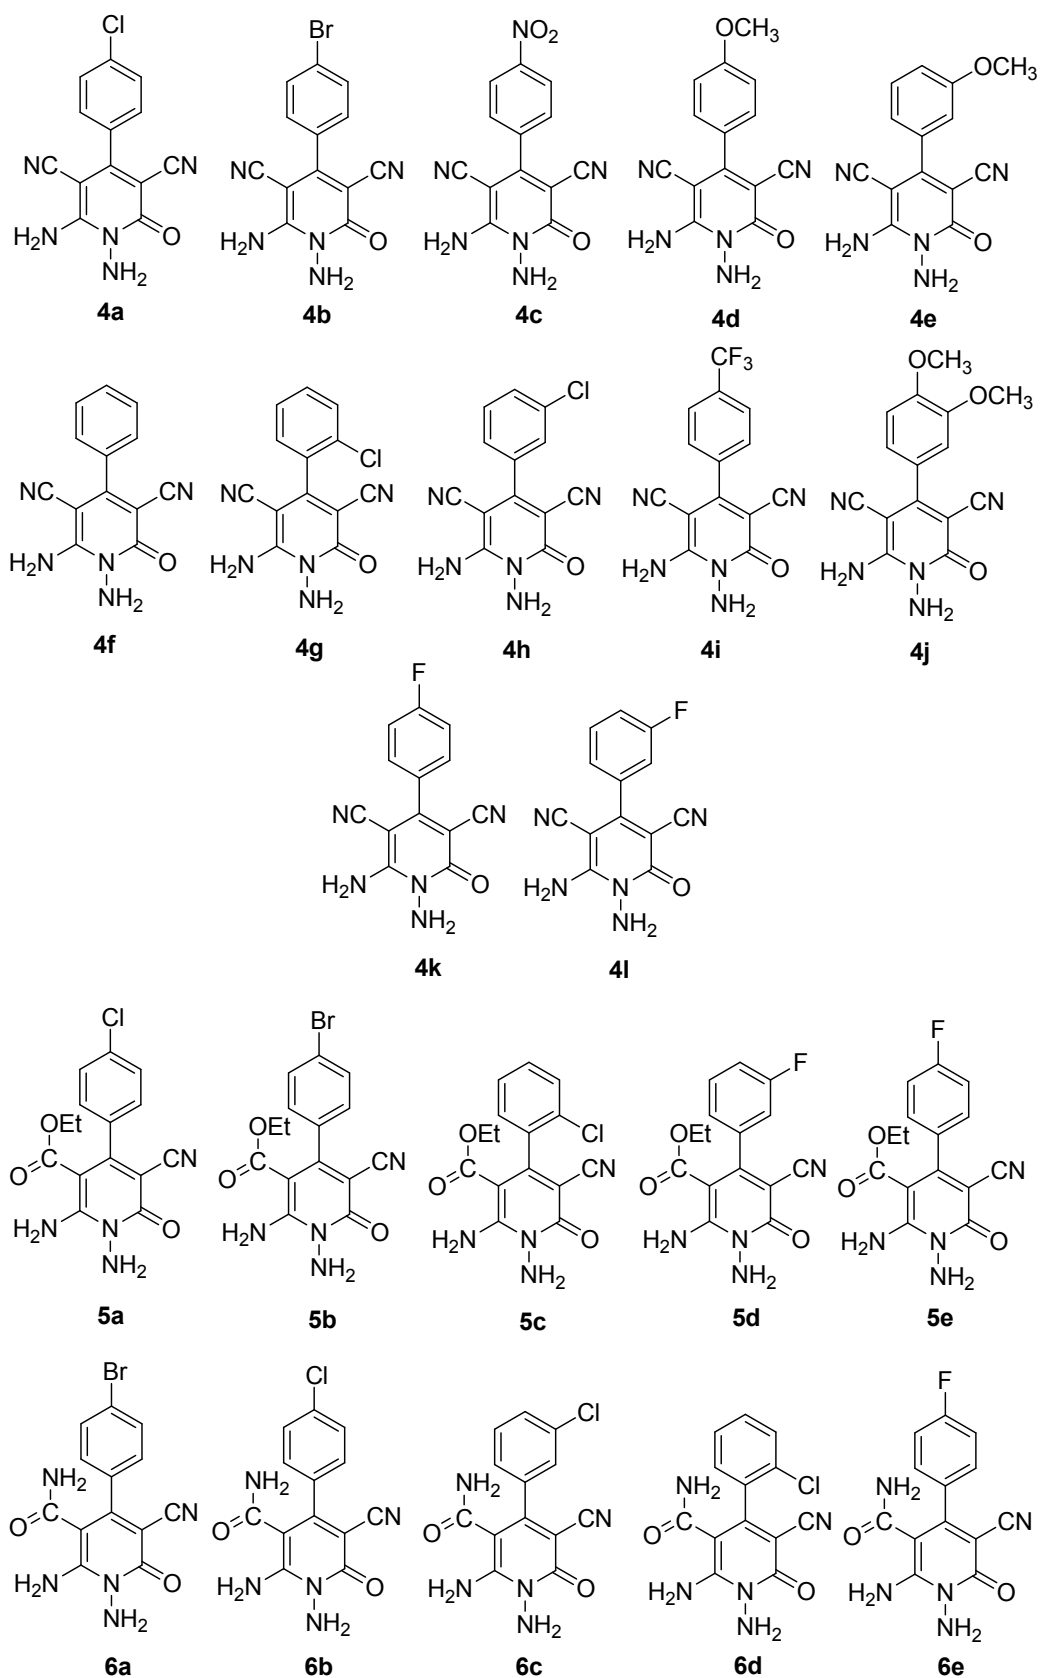

**Figure 1.** Structure of all products **4a-l**, **5a-e**, **6a-e**.

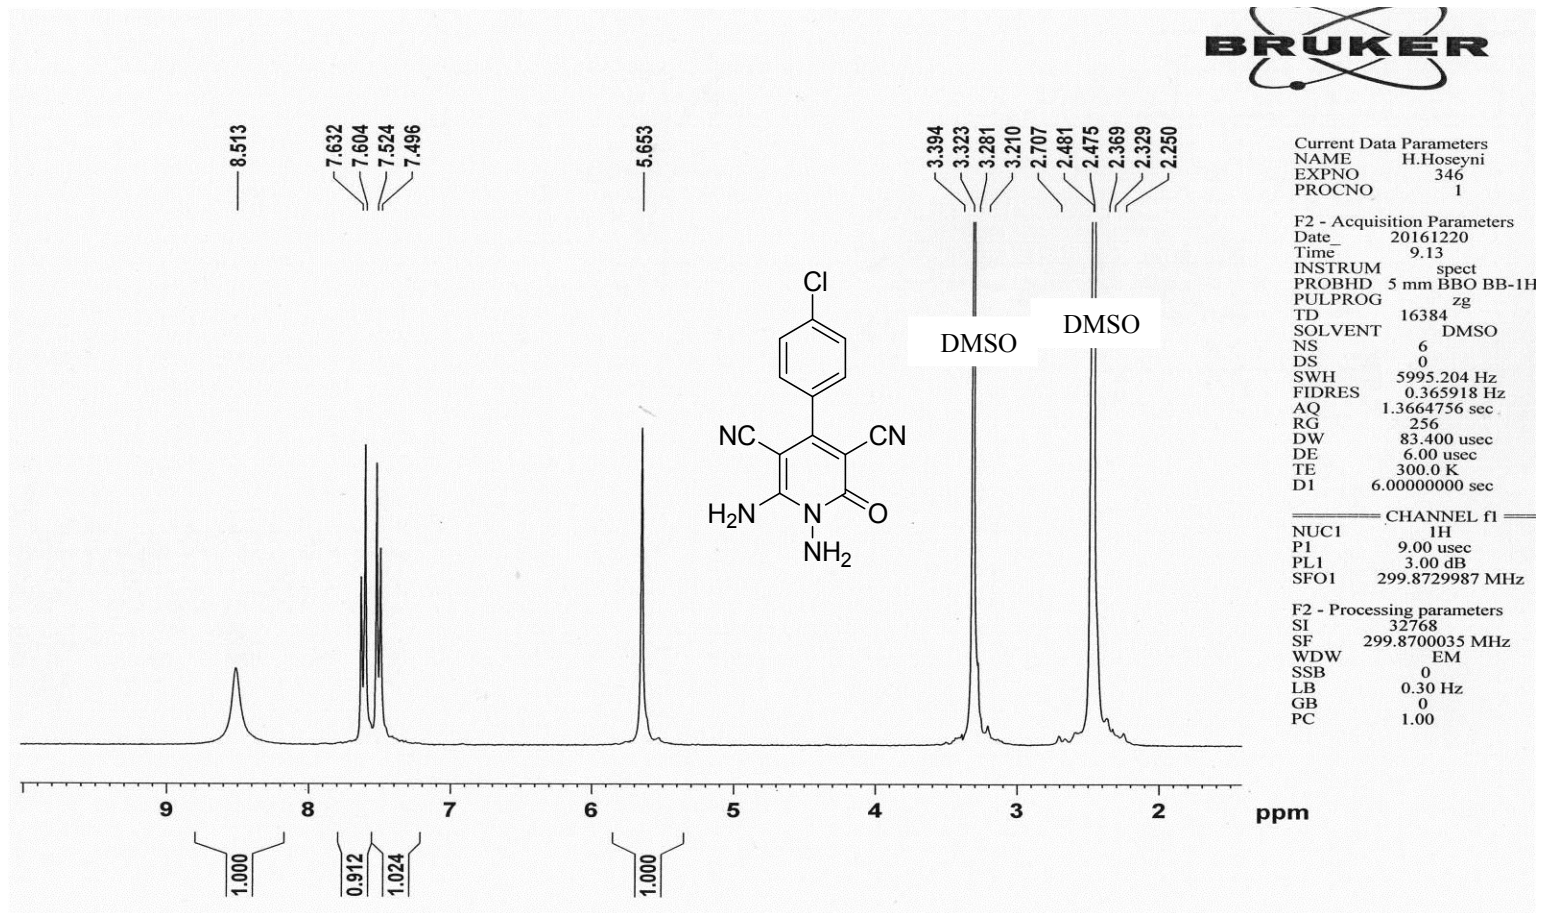



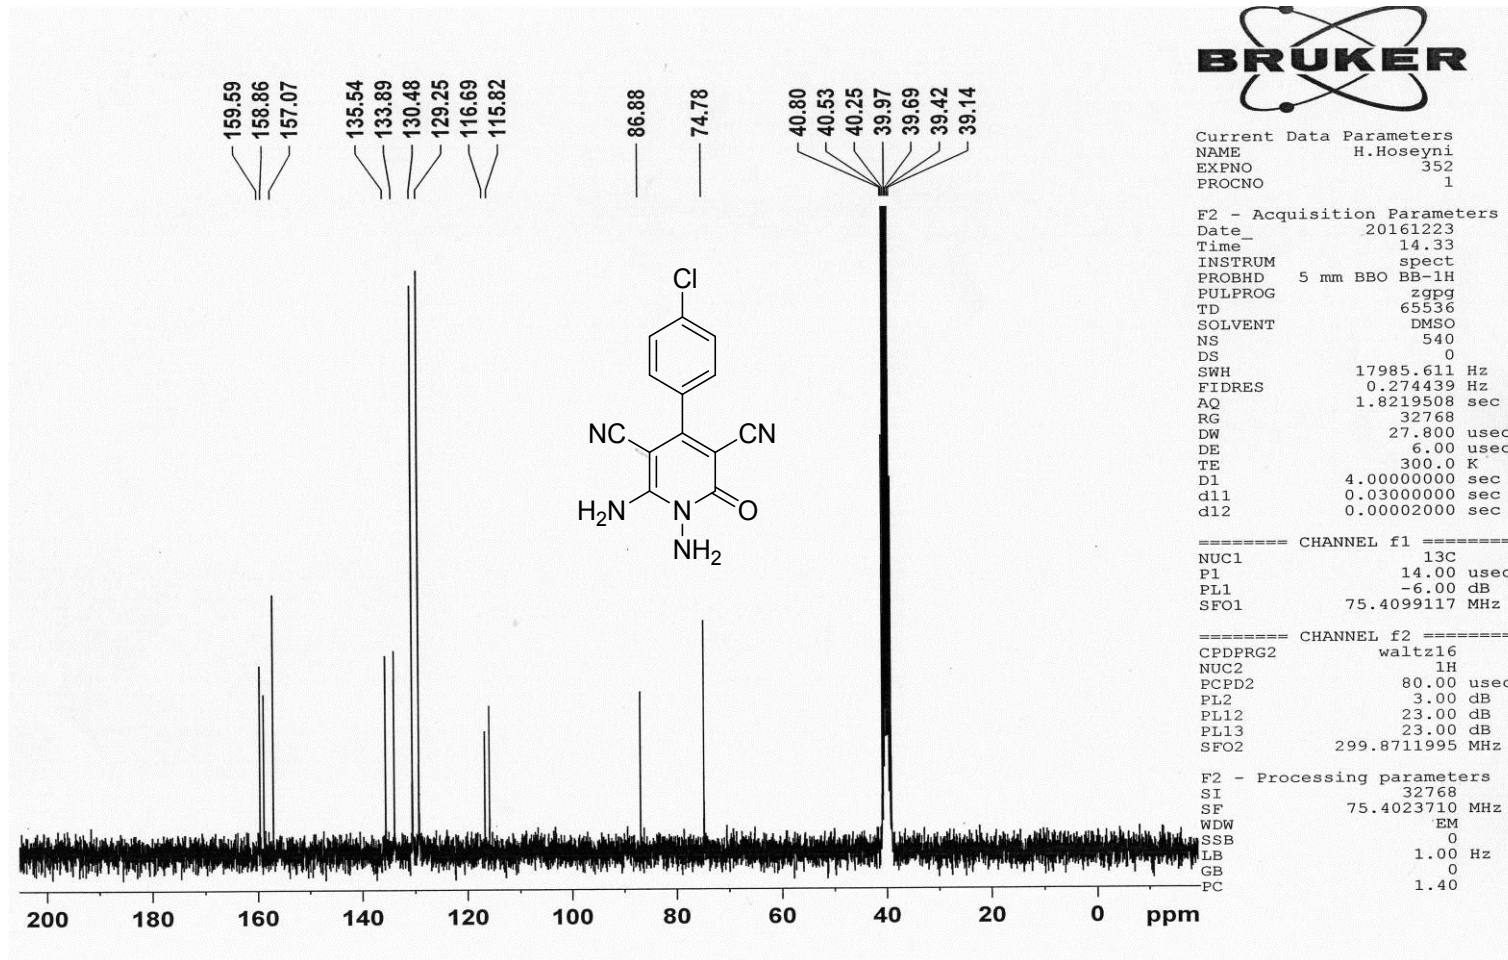

**<sup>13</sup>C NMR of 4a**

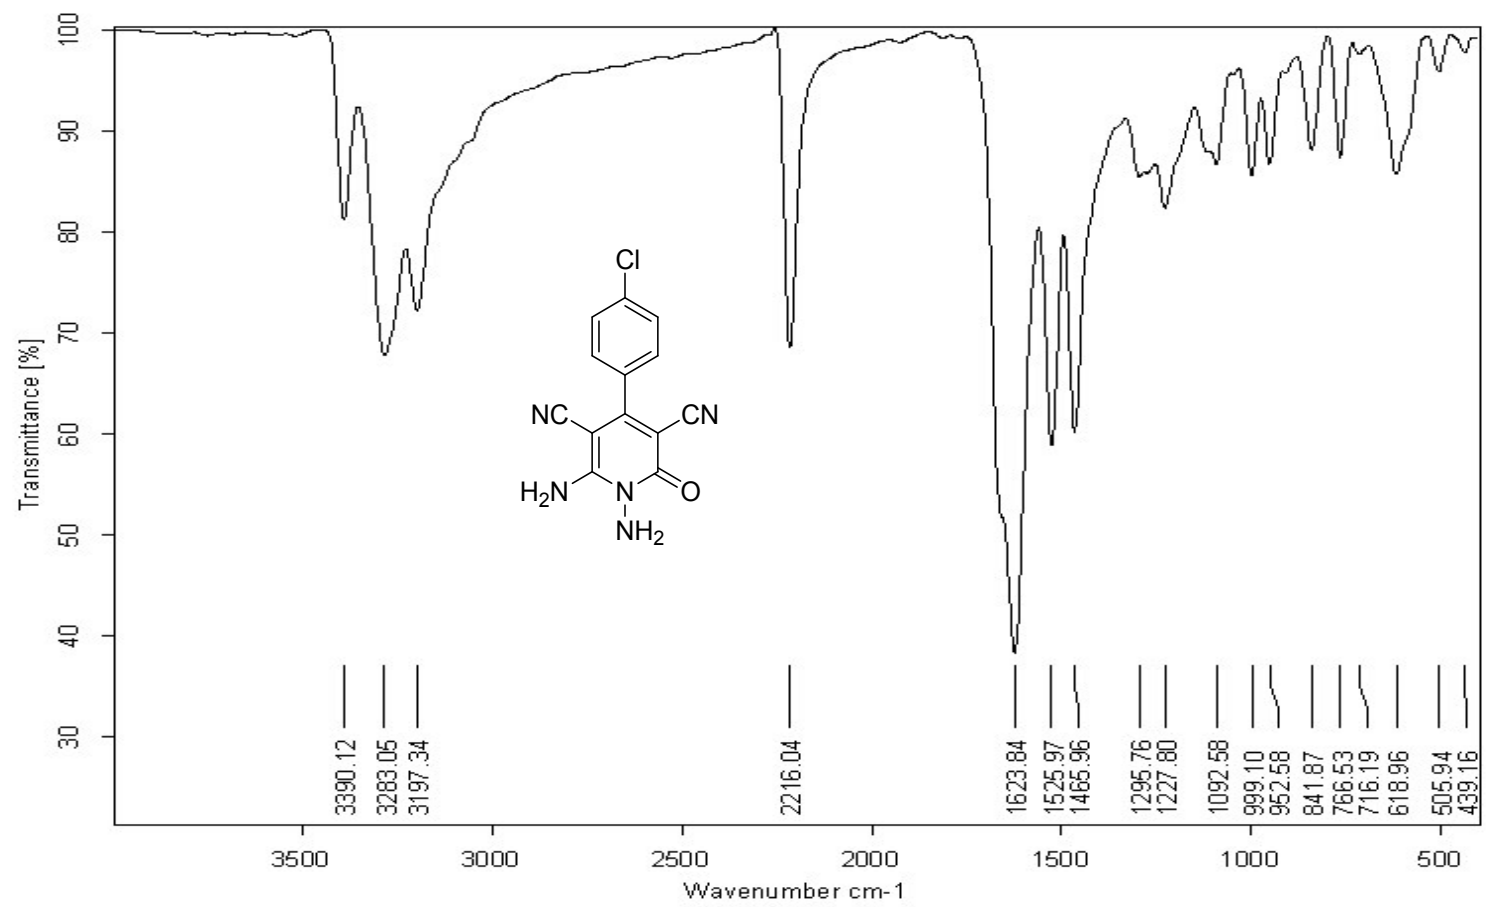**IR of 4a**

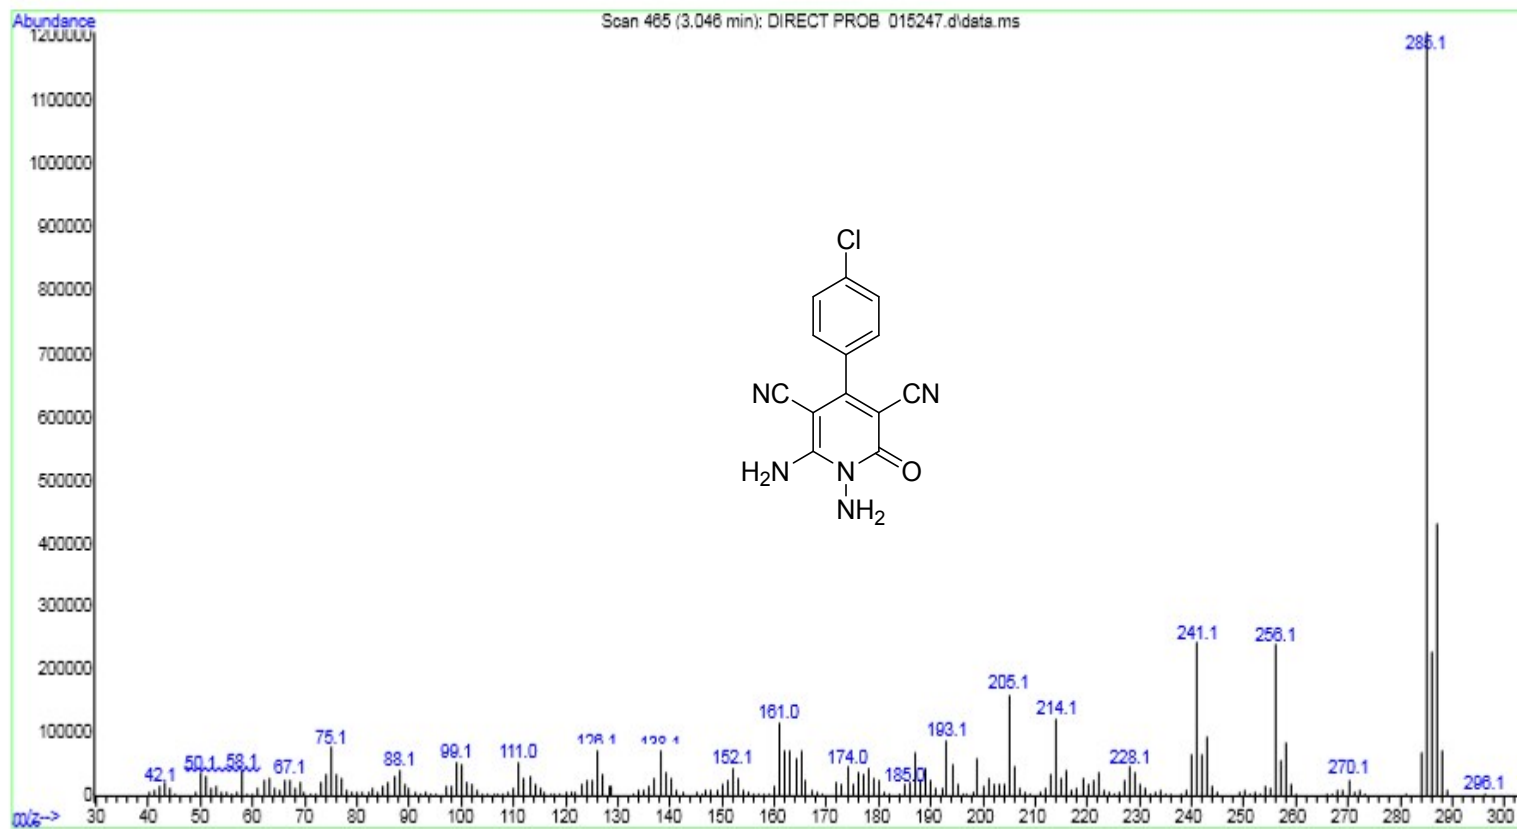

MS of 4a

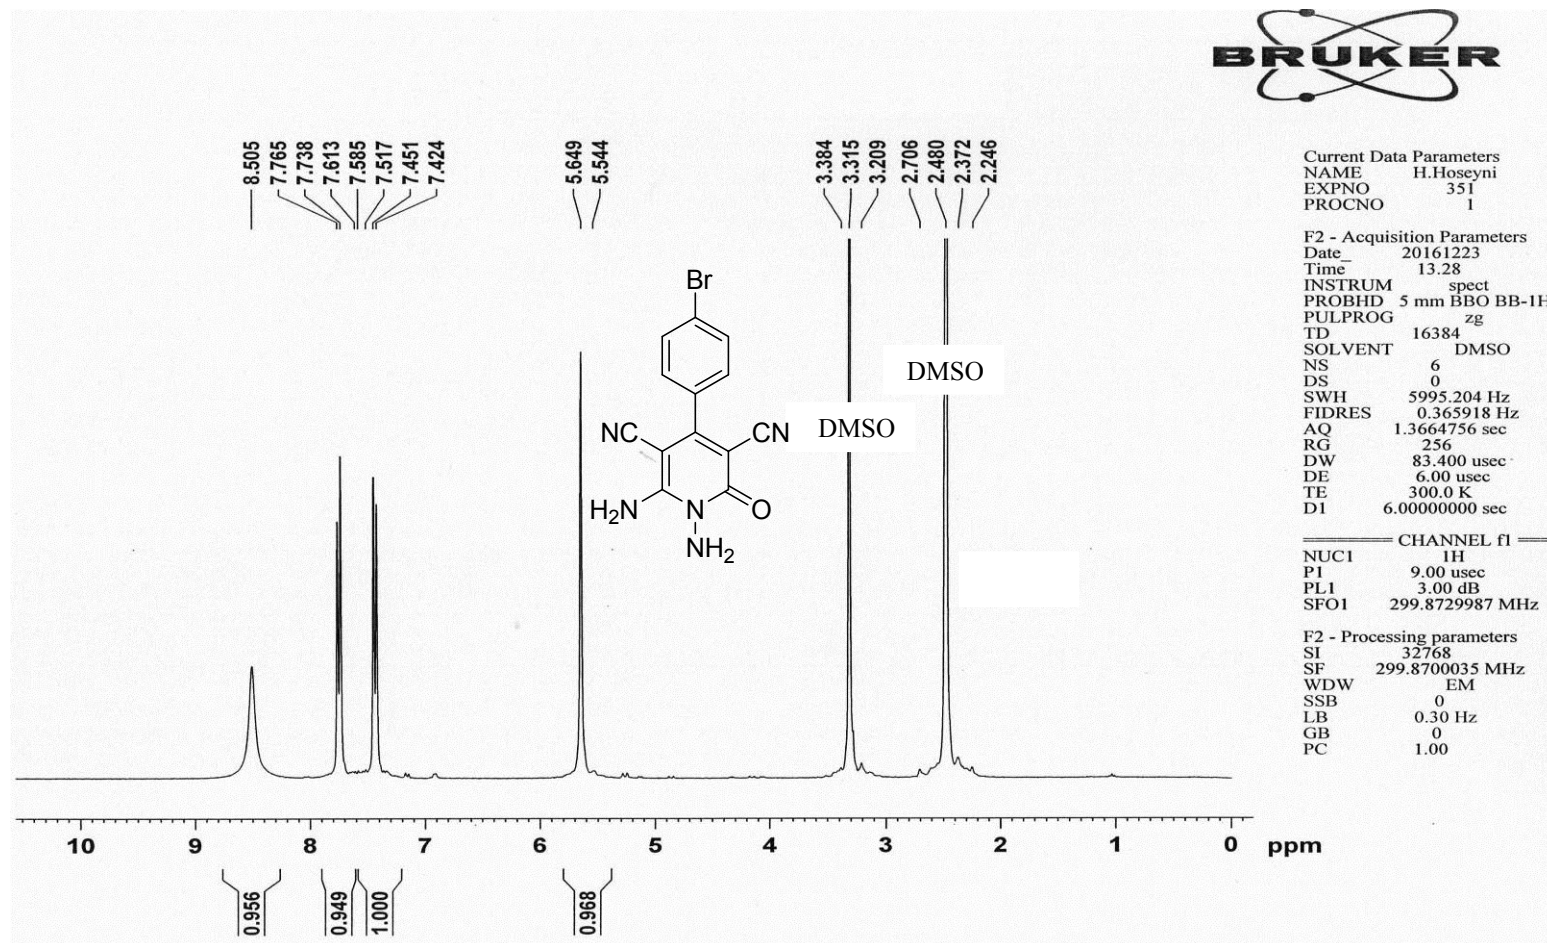<sup>1</sup>H NMR of 4b

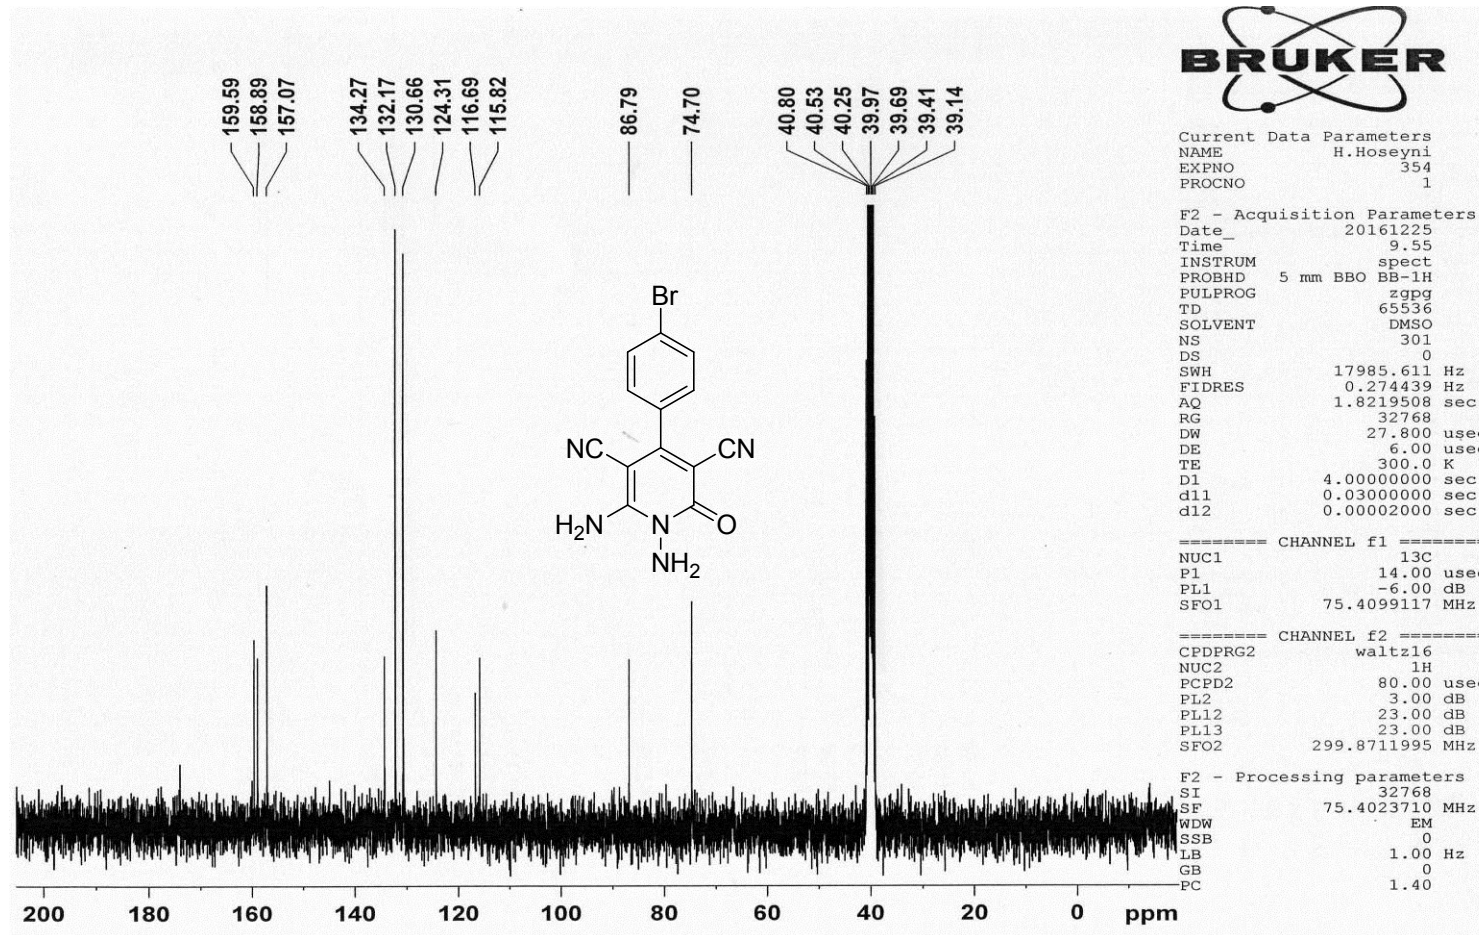<sup>13</sup>C NMR of 4b

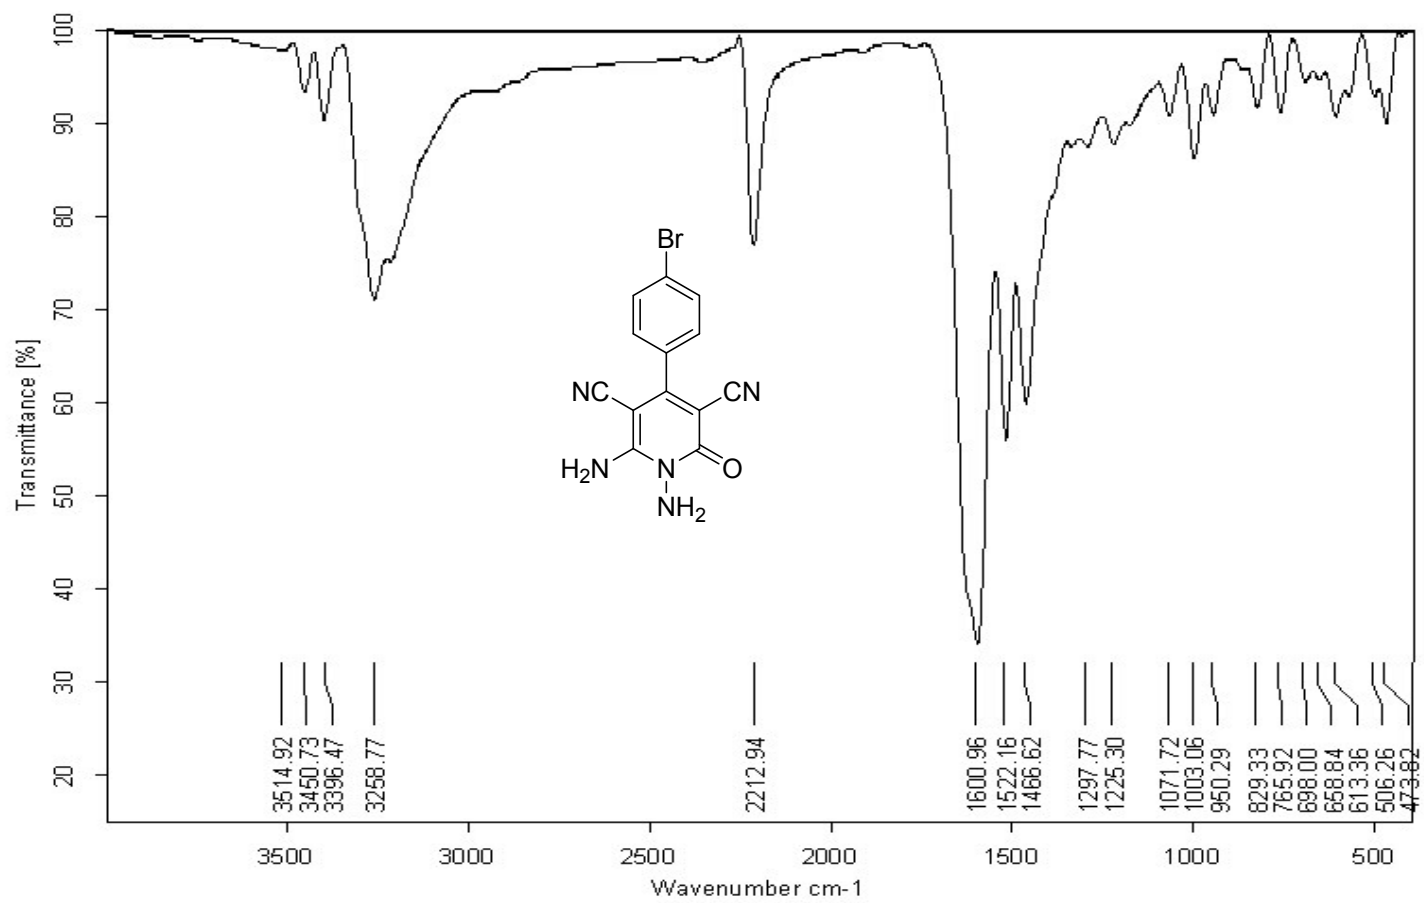

IR of 4b

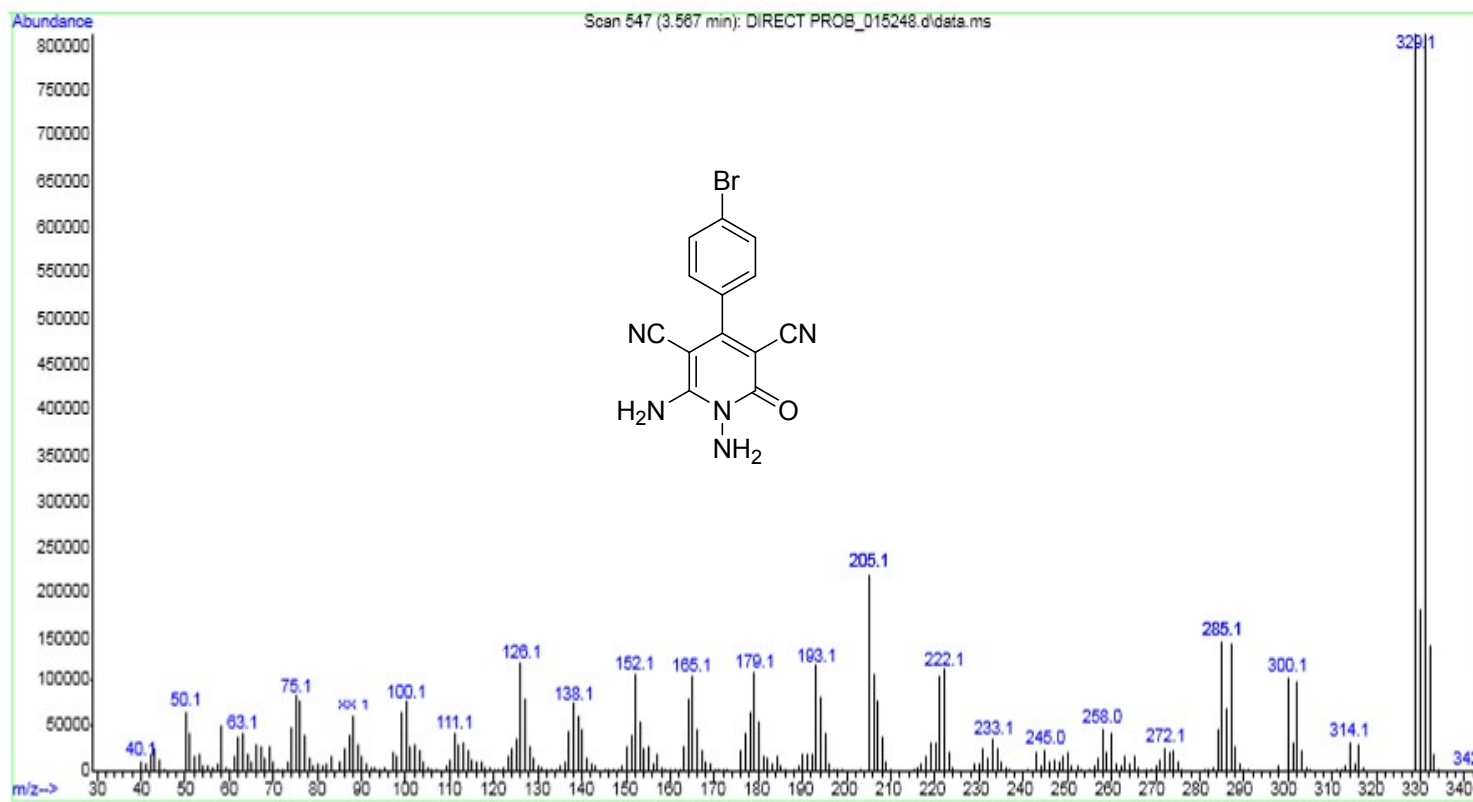

MS of 4b



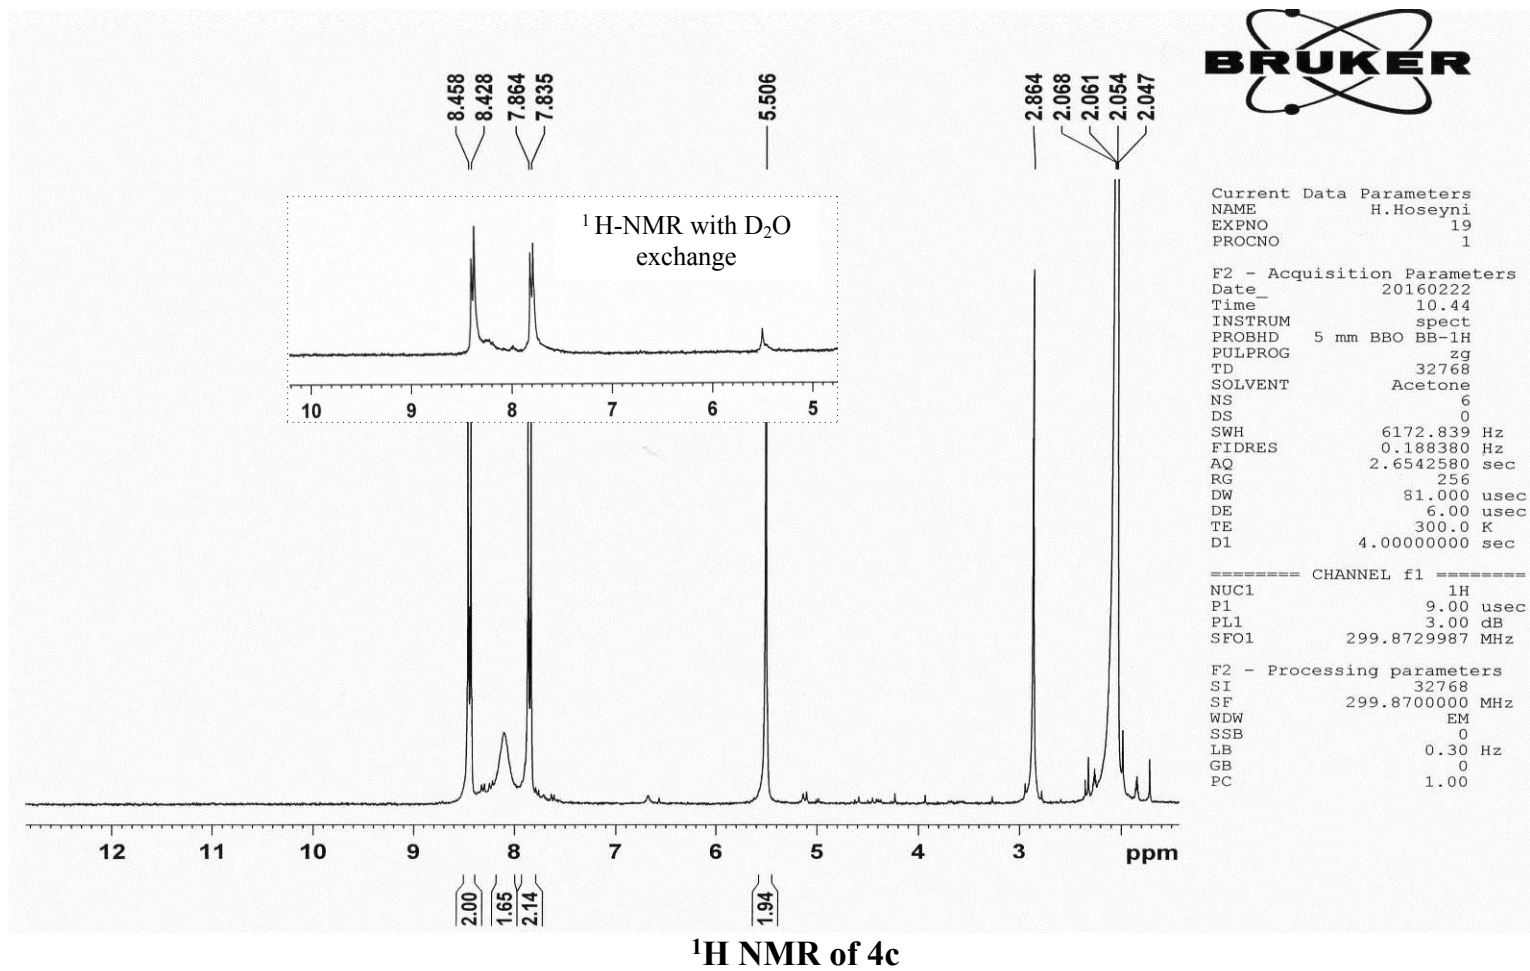



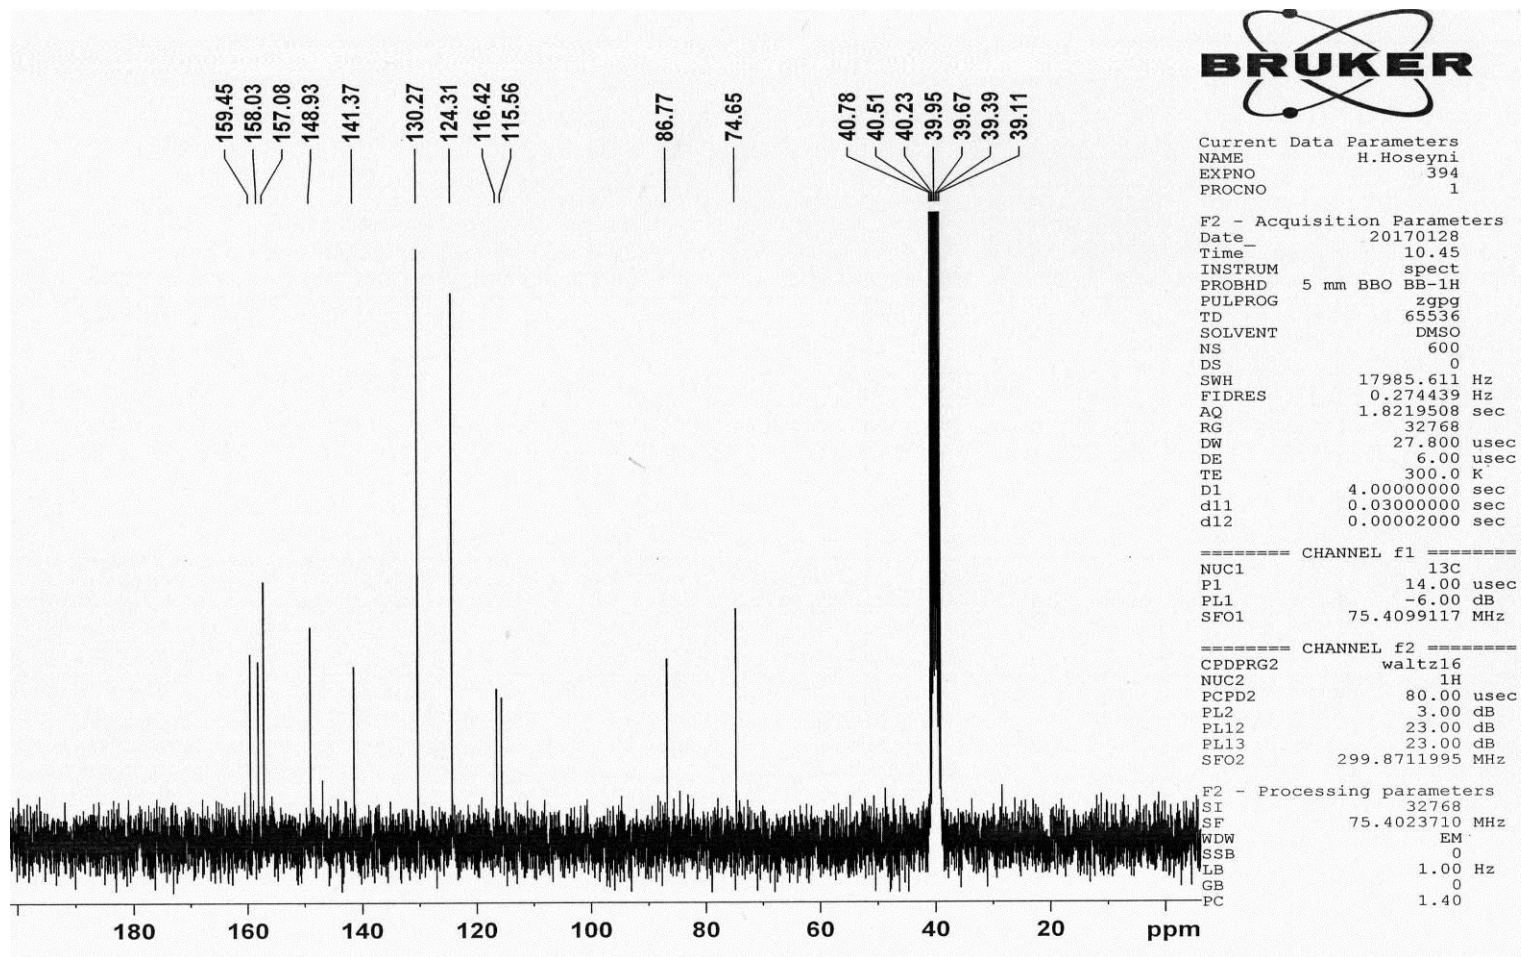 $^{13}\text{C}$  NMR of 4c

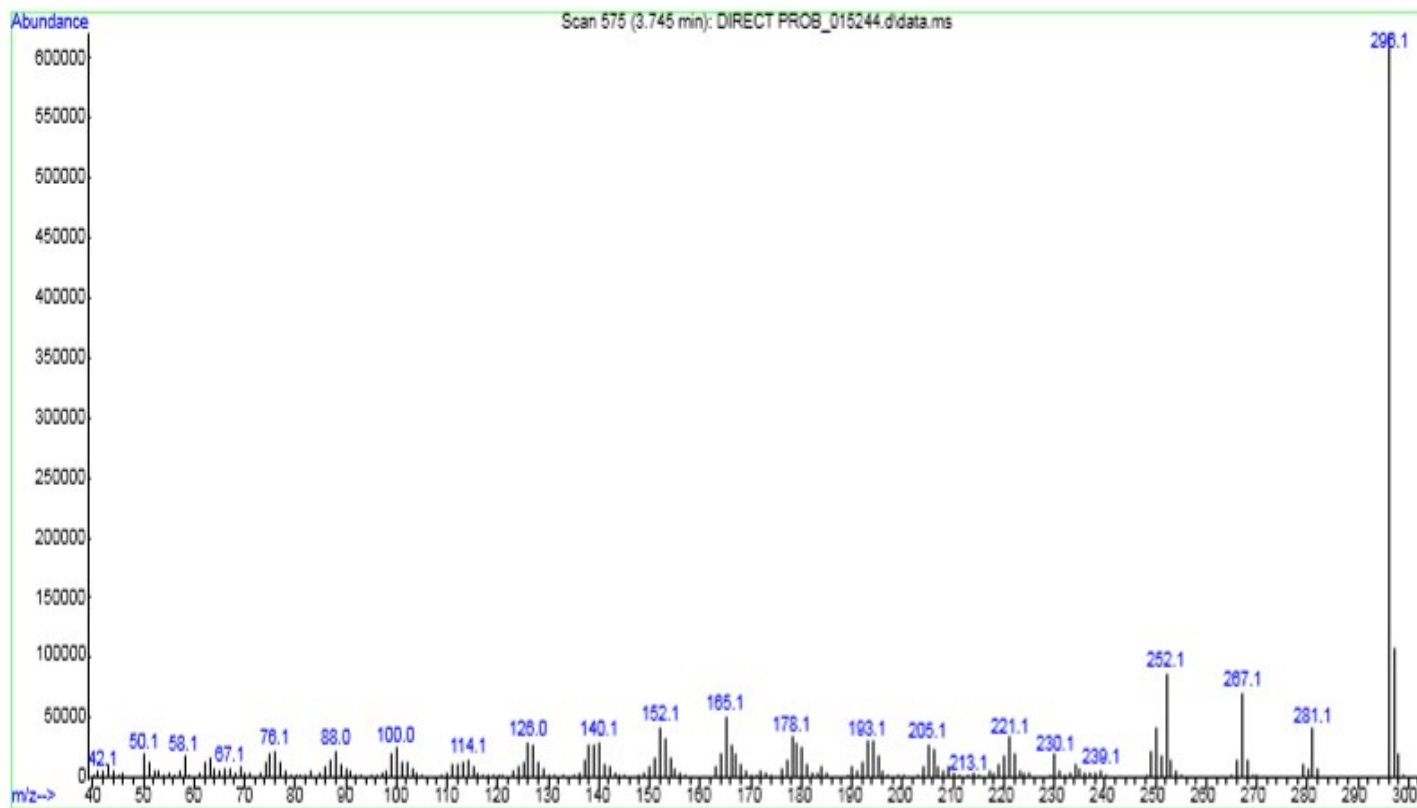

**MS of 4c**

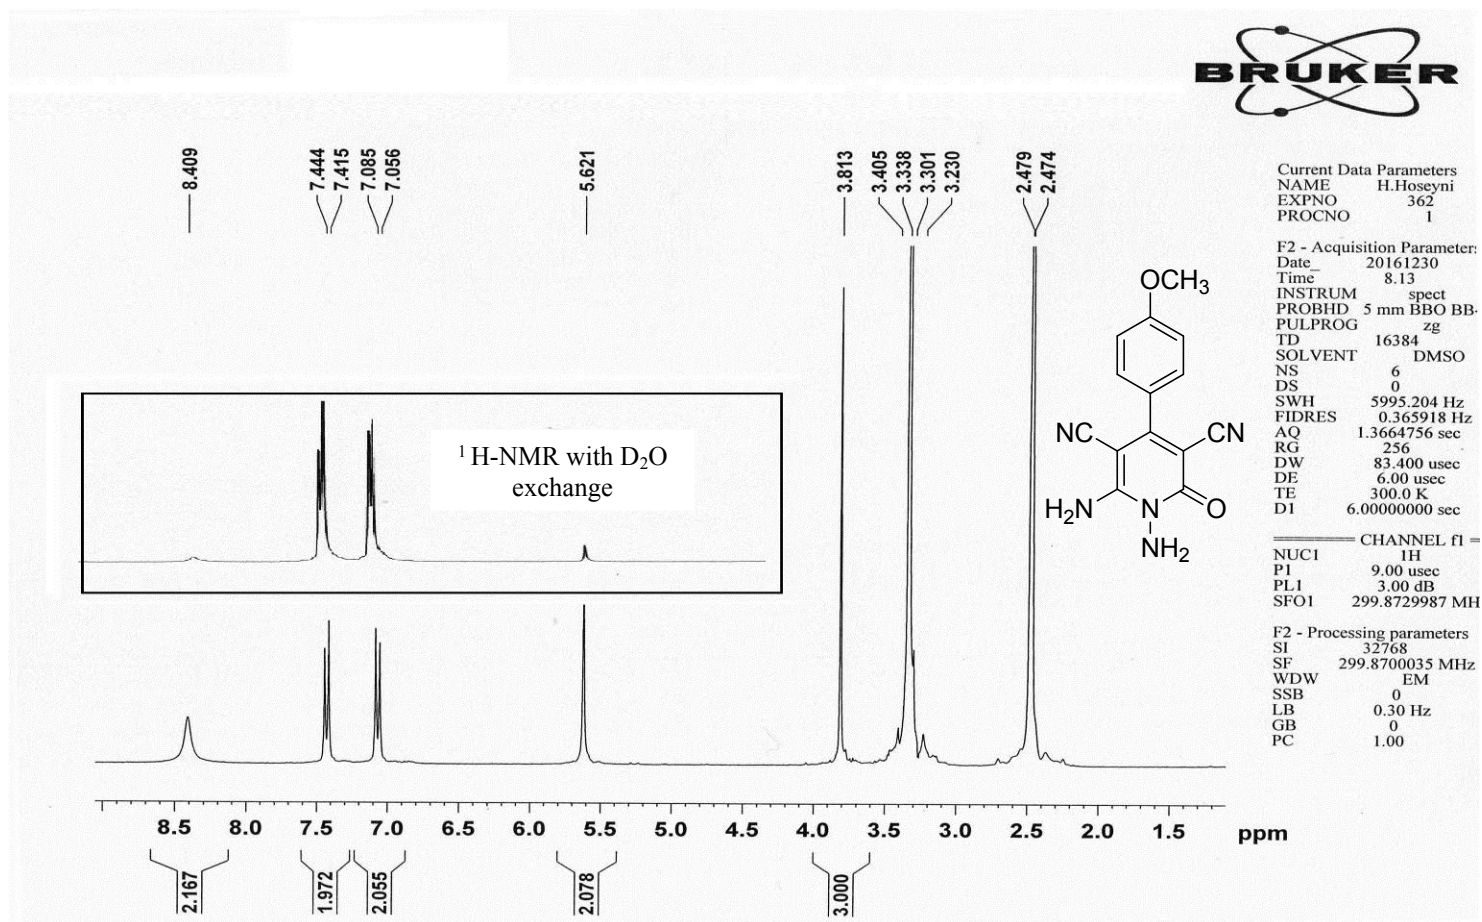<sup>1</sup>H NMR of 4d

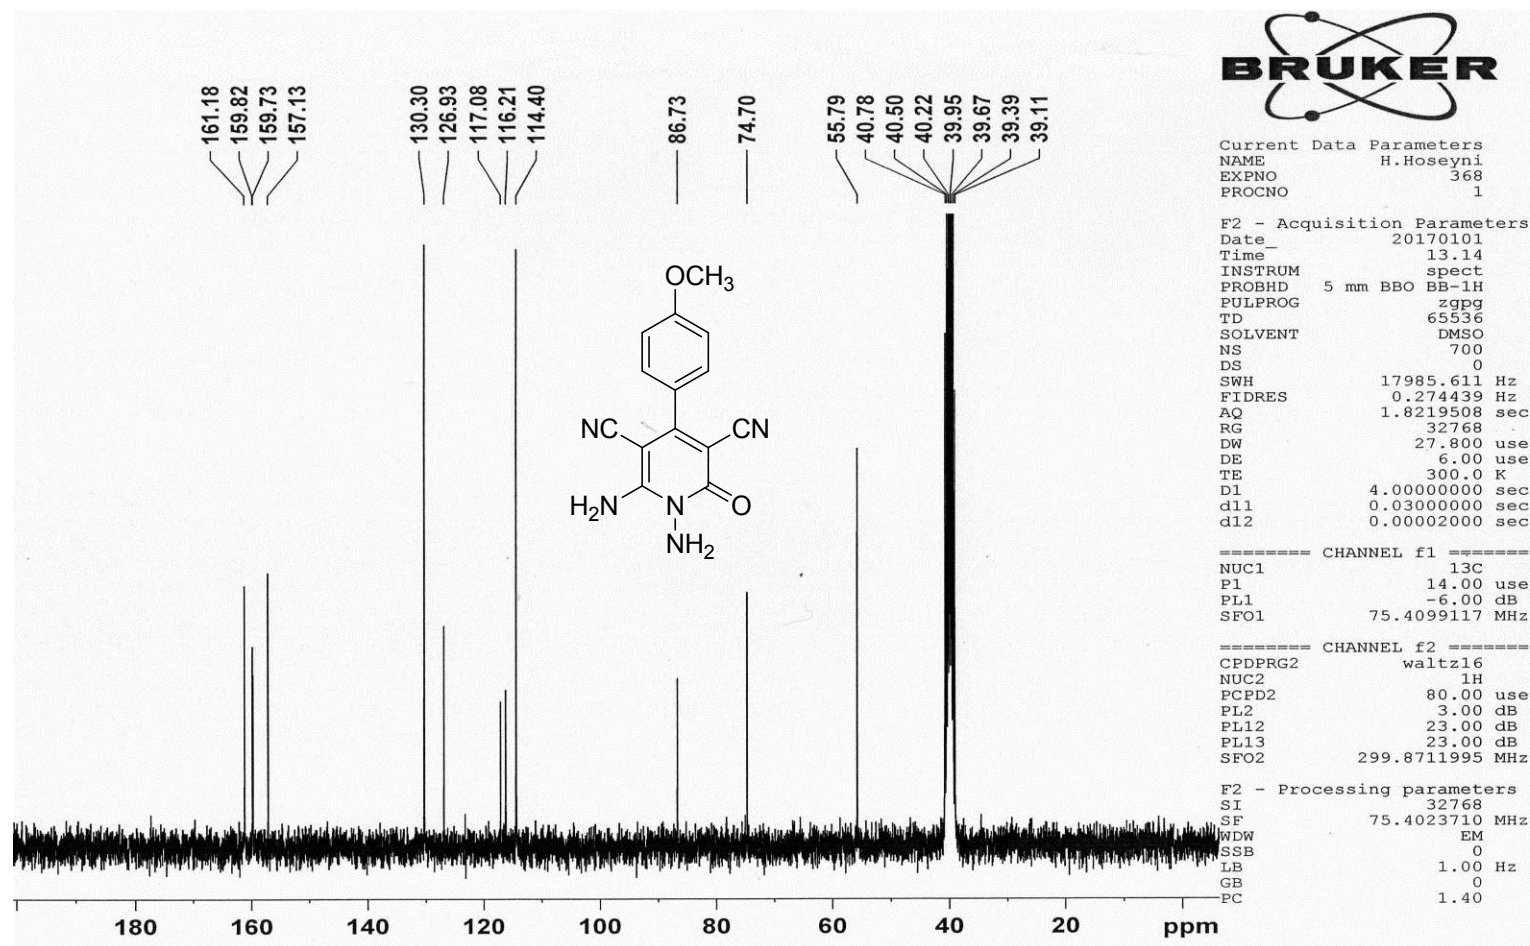<sup>13</sup>C NMR of 4d

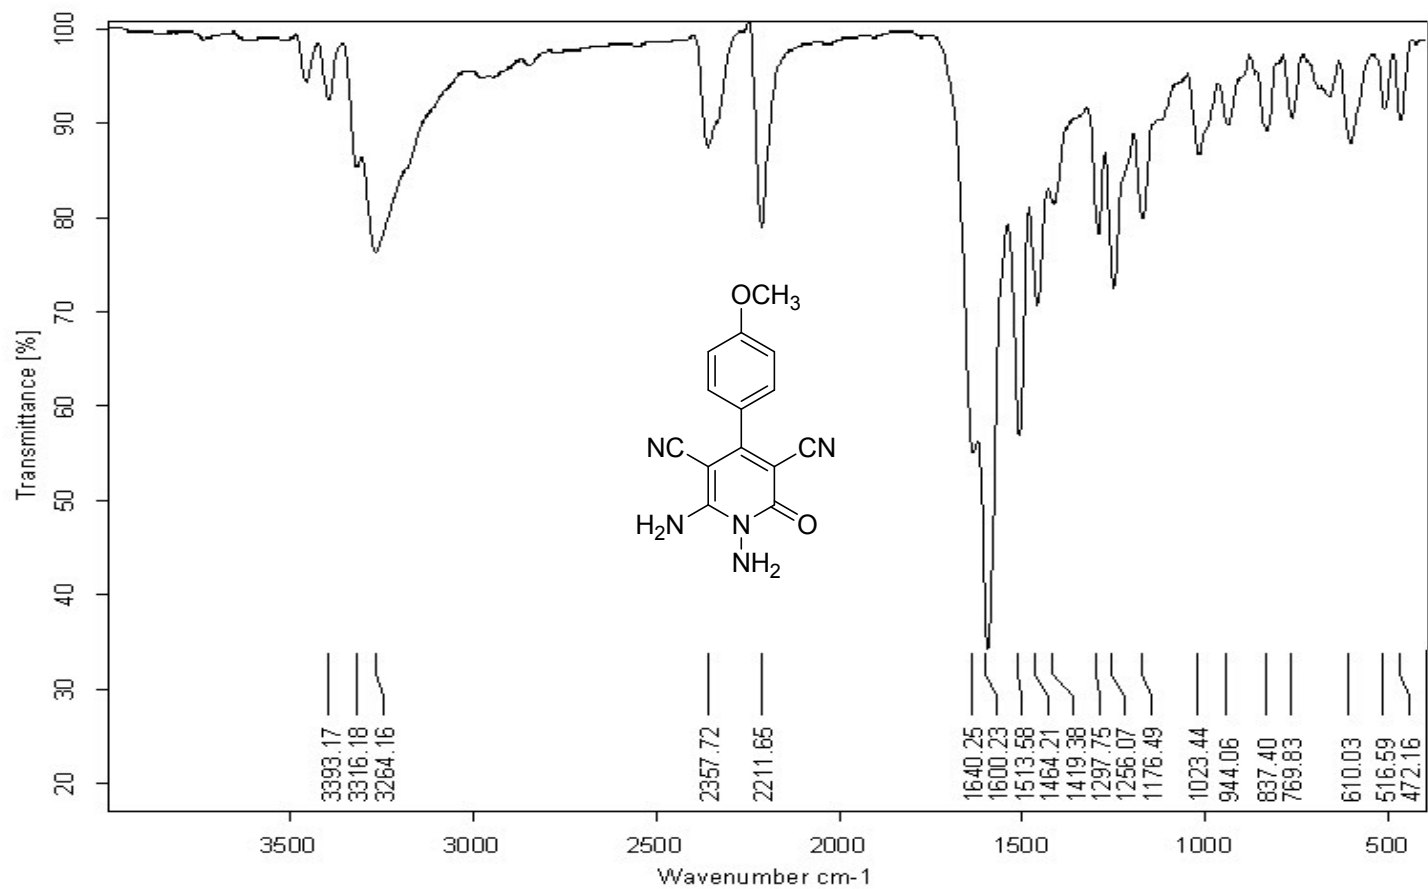**IR of 4d**

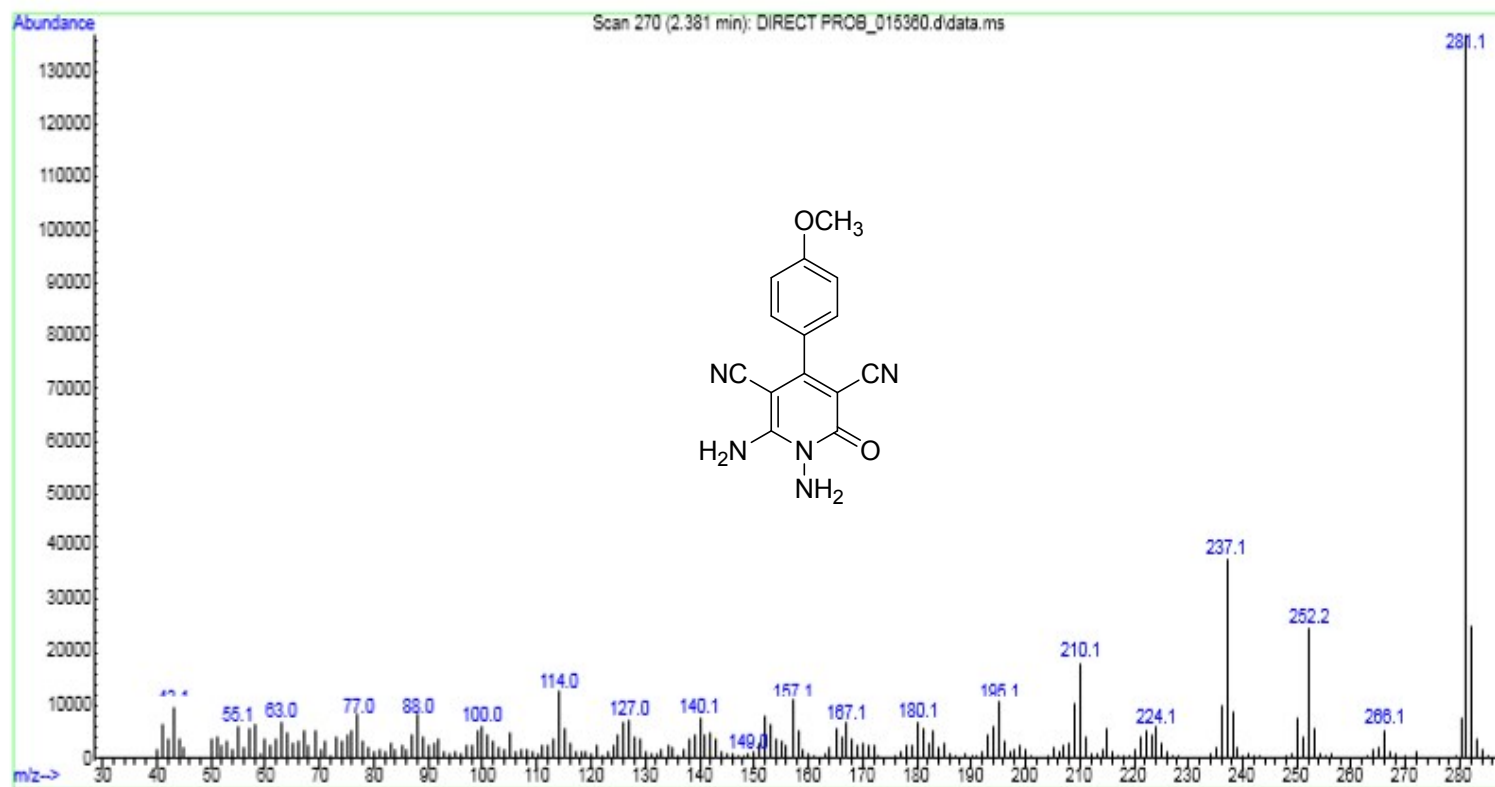

**MS of 4d**



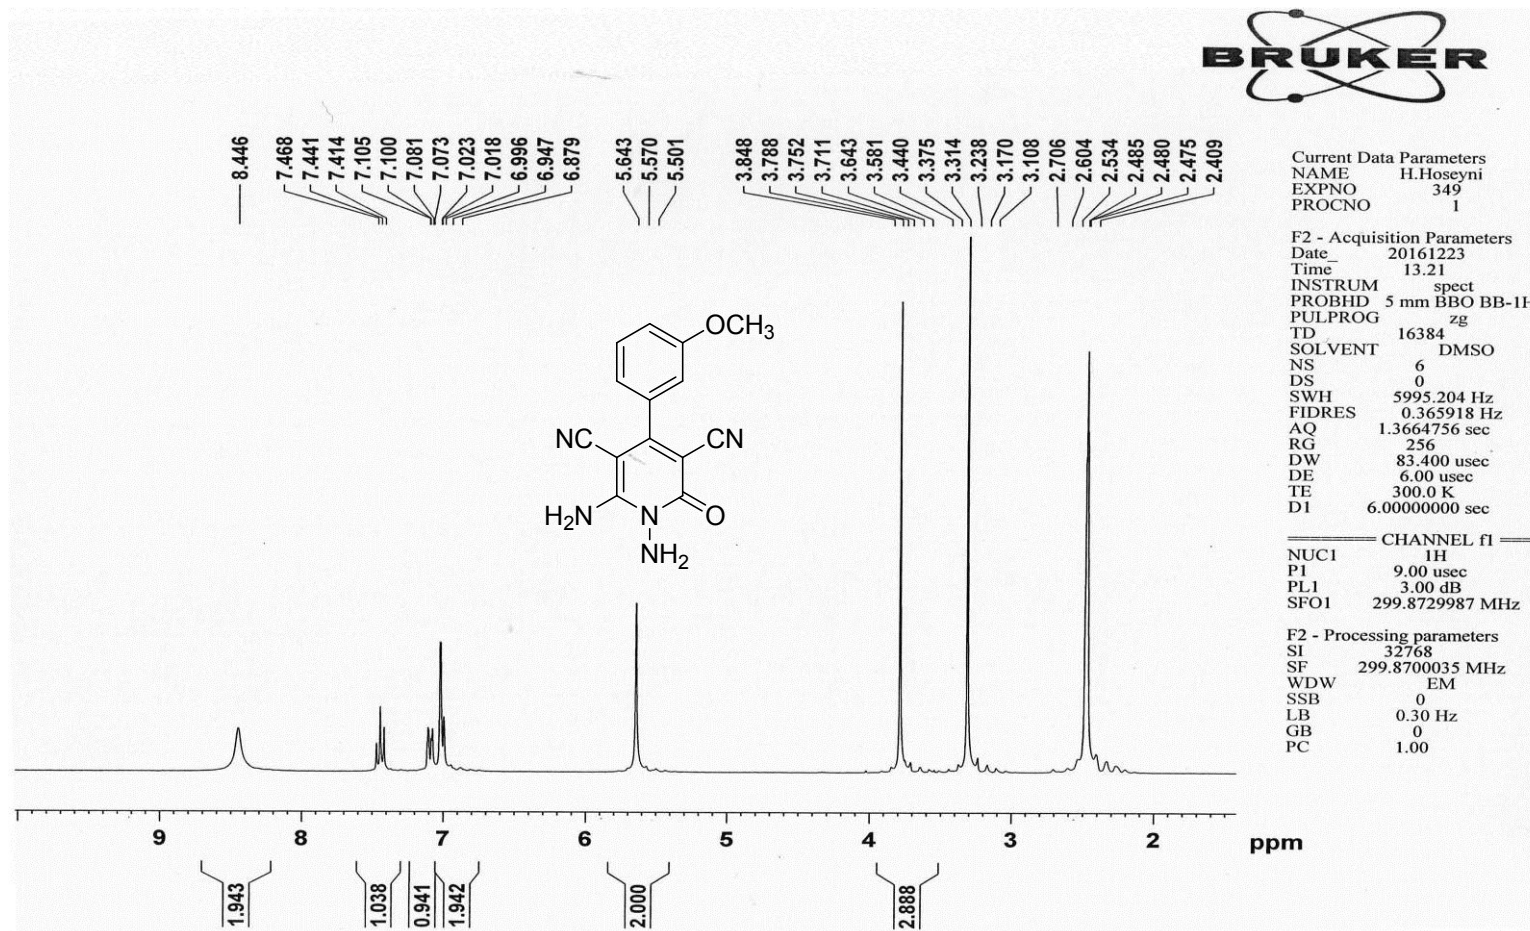

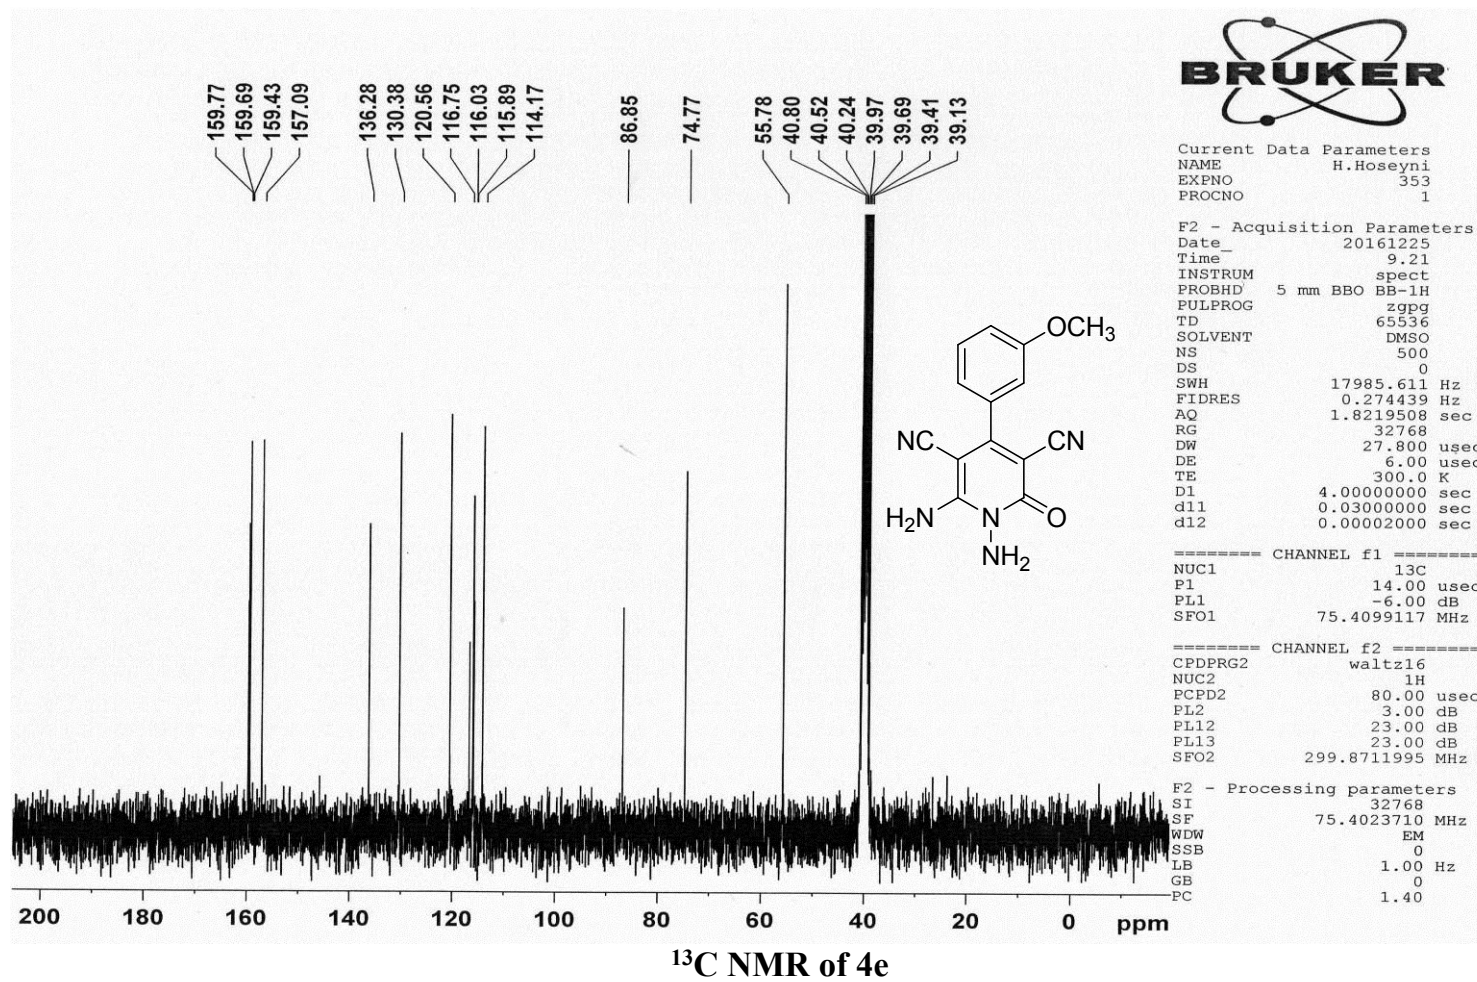



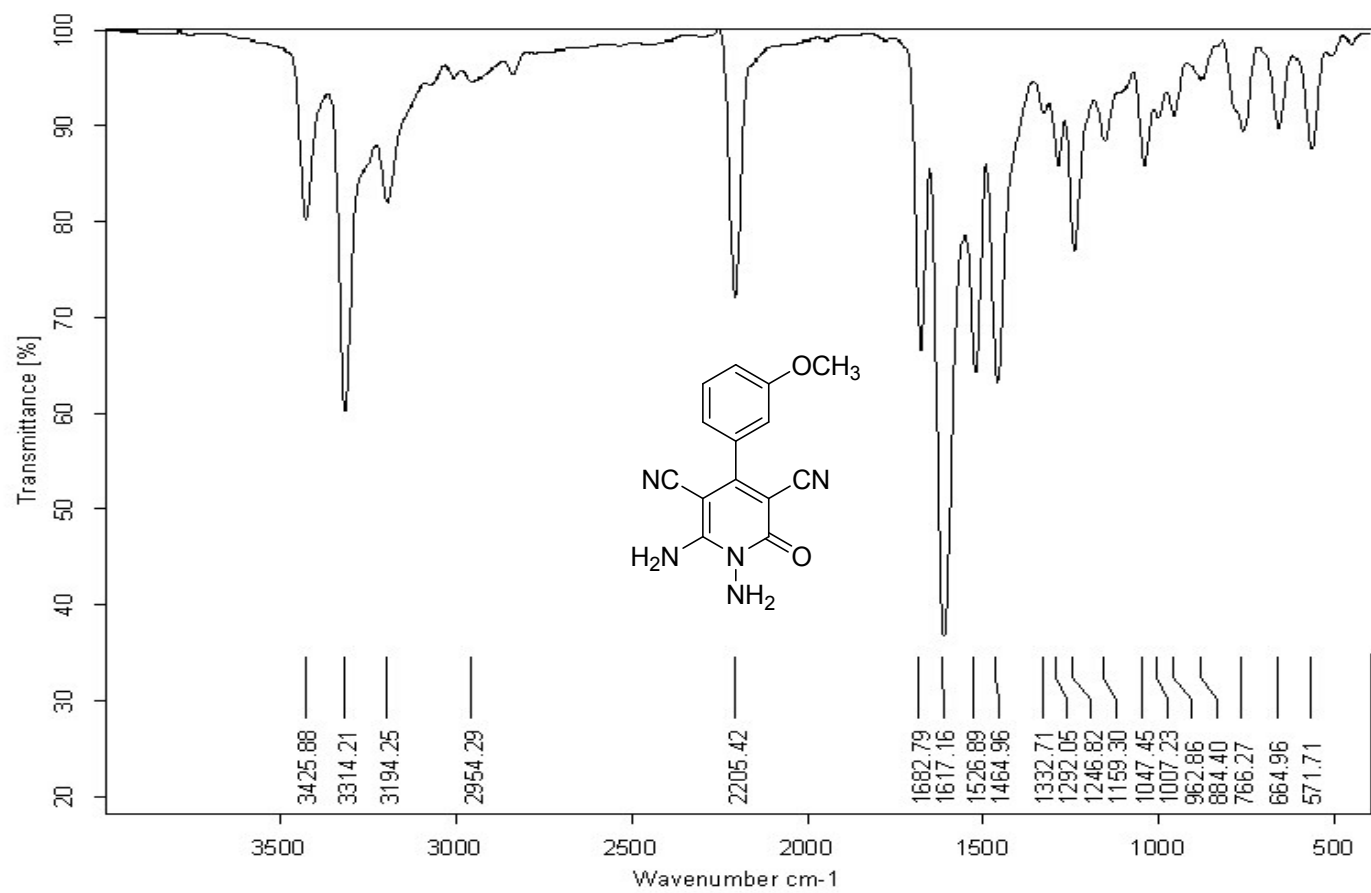**IR of 4e**

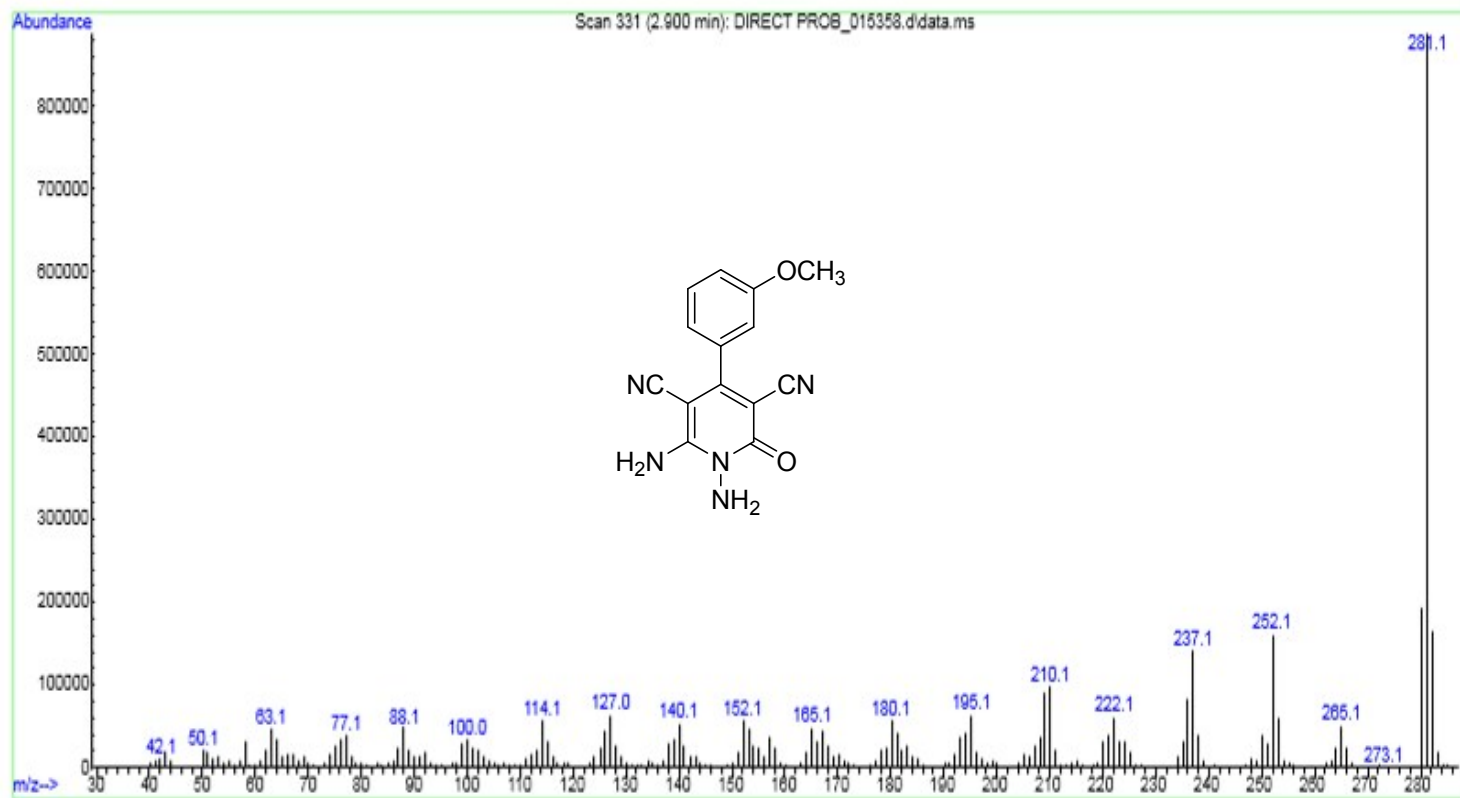

MS of 4e

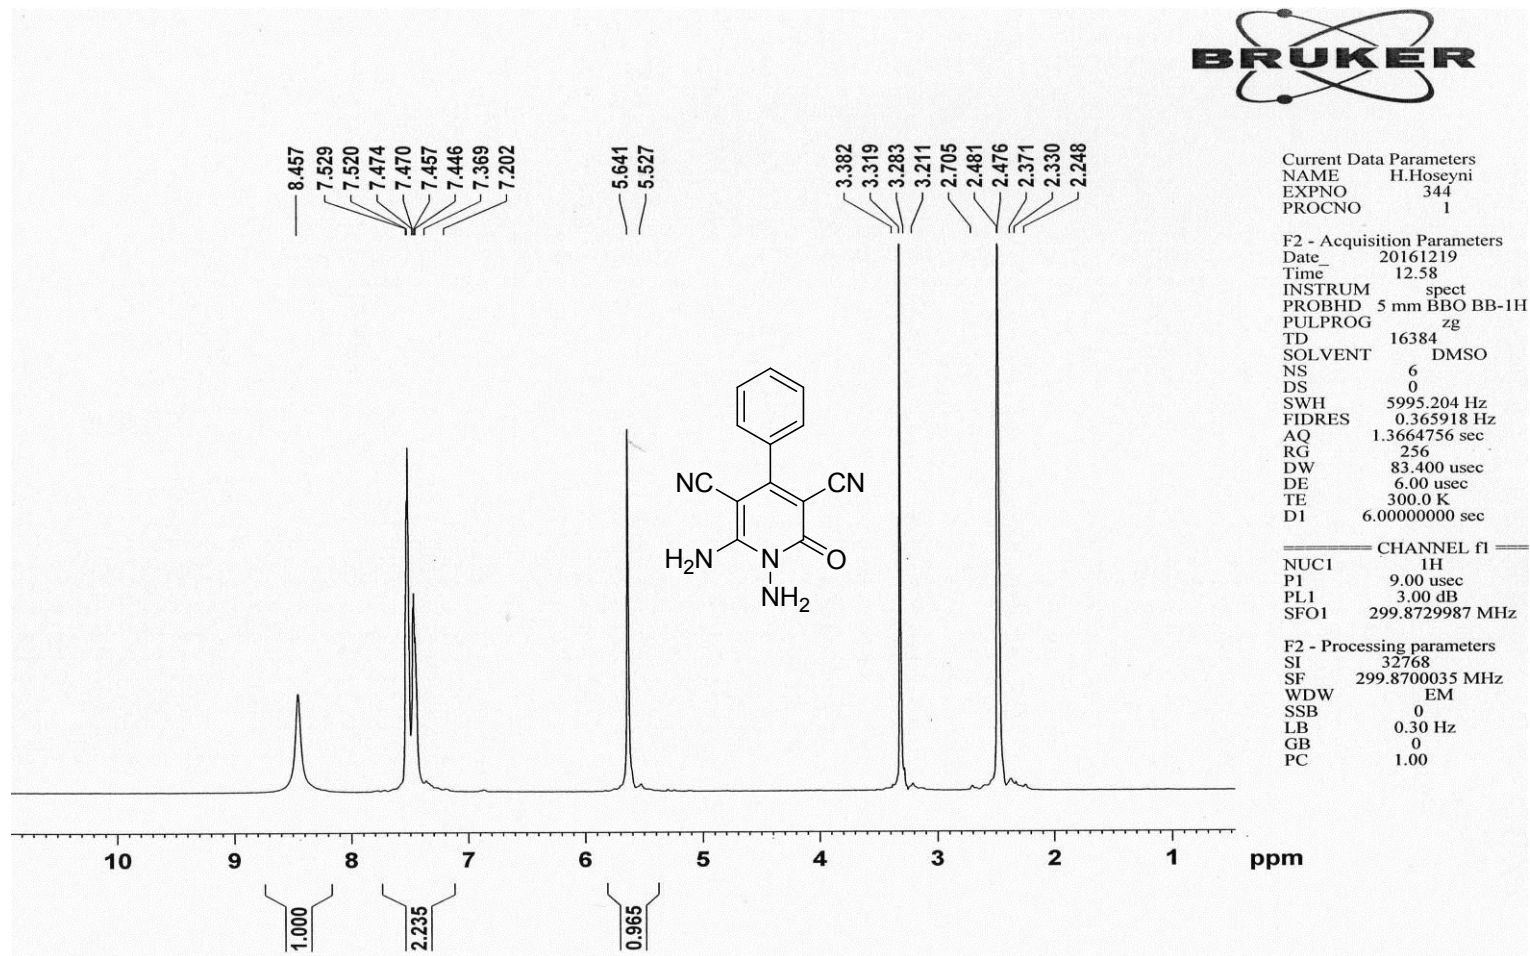<sup>1</sup>H NMR of 4f

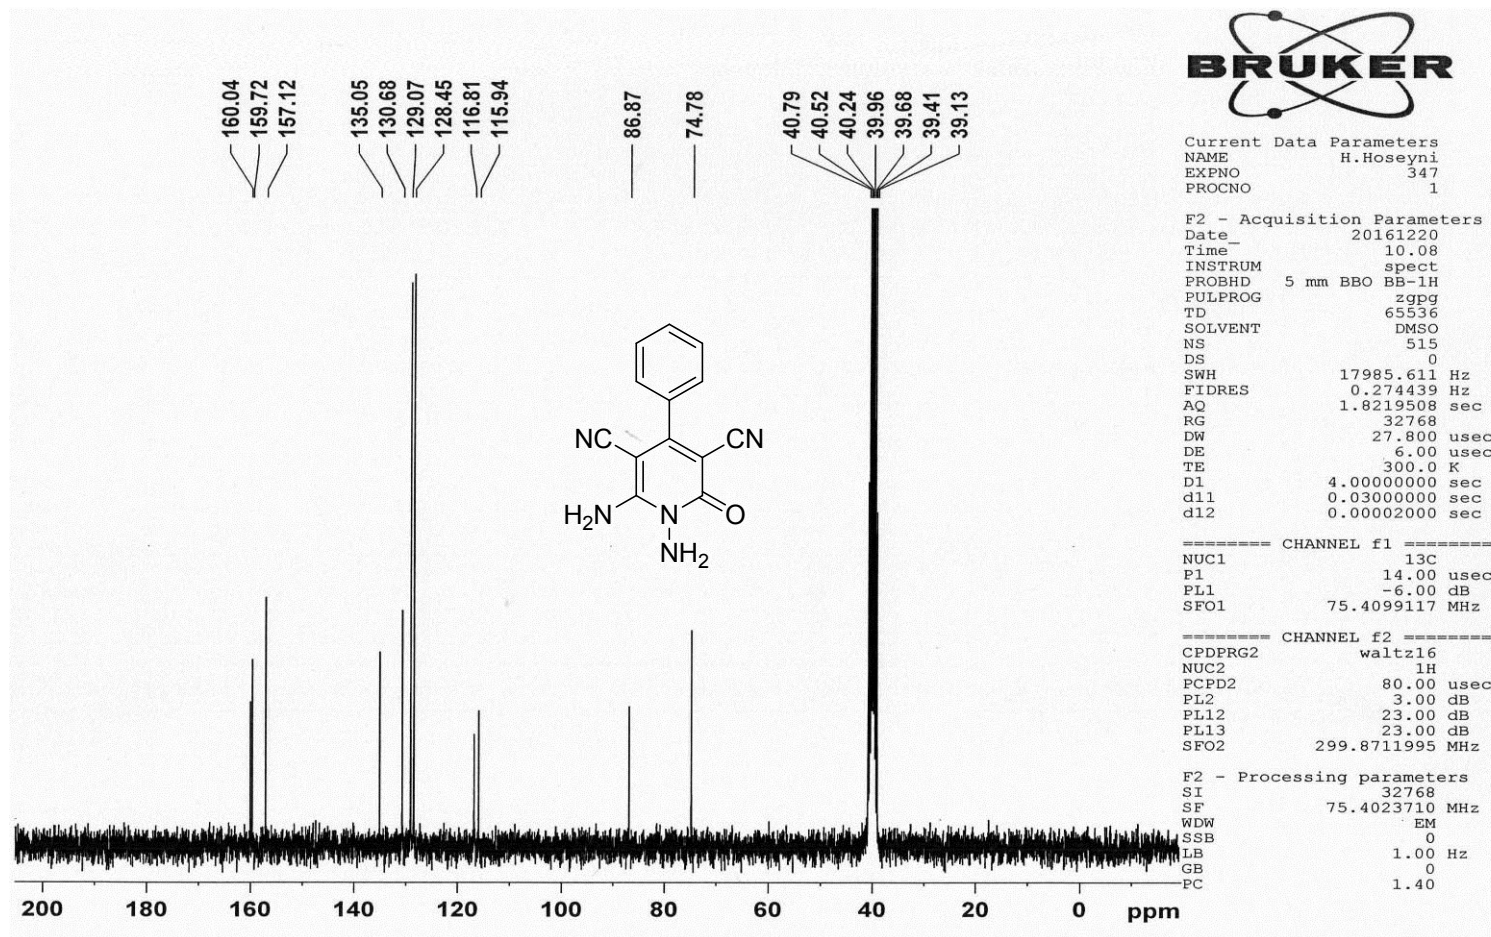<sup>13</sup>C NMR of 4f

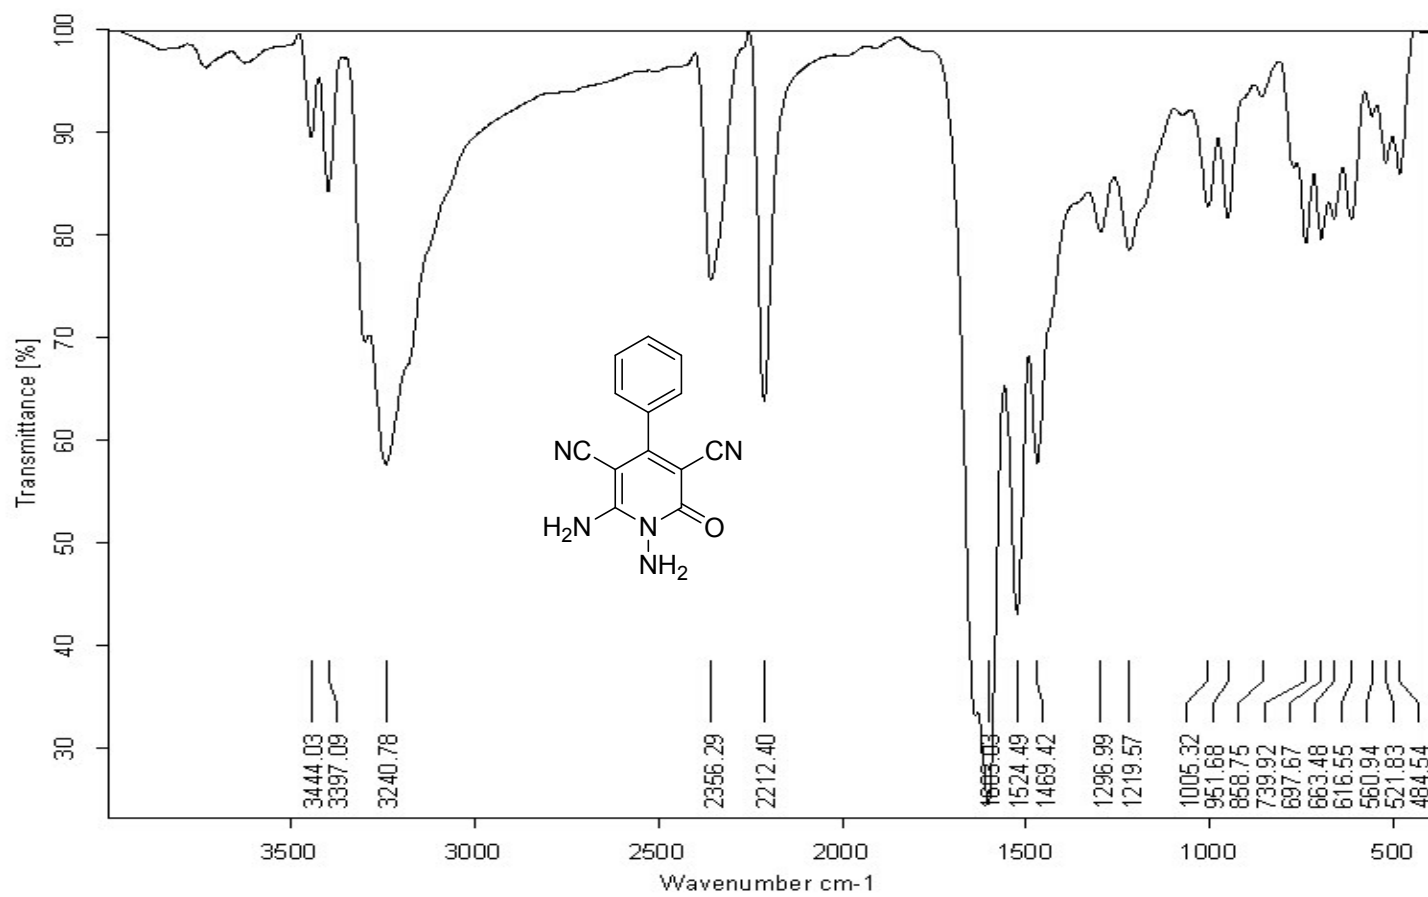

IR of 4f

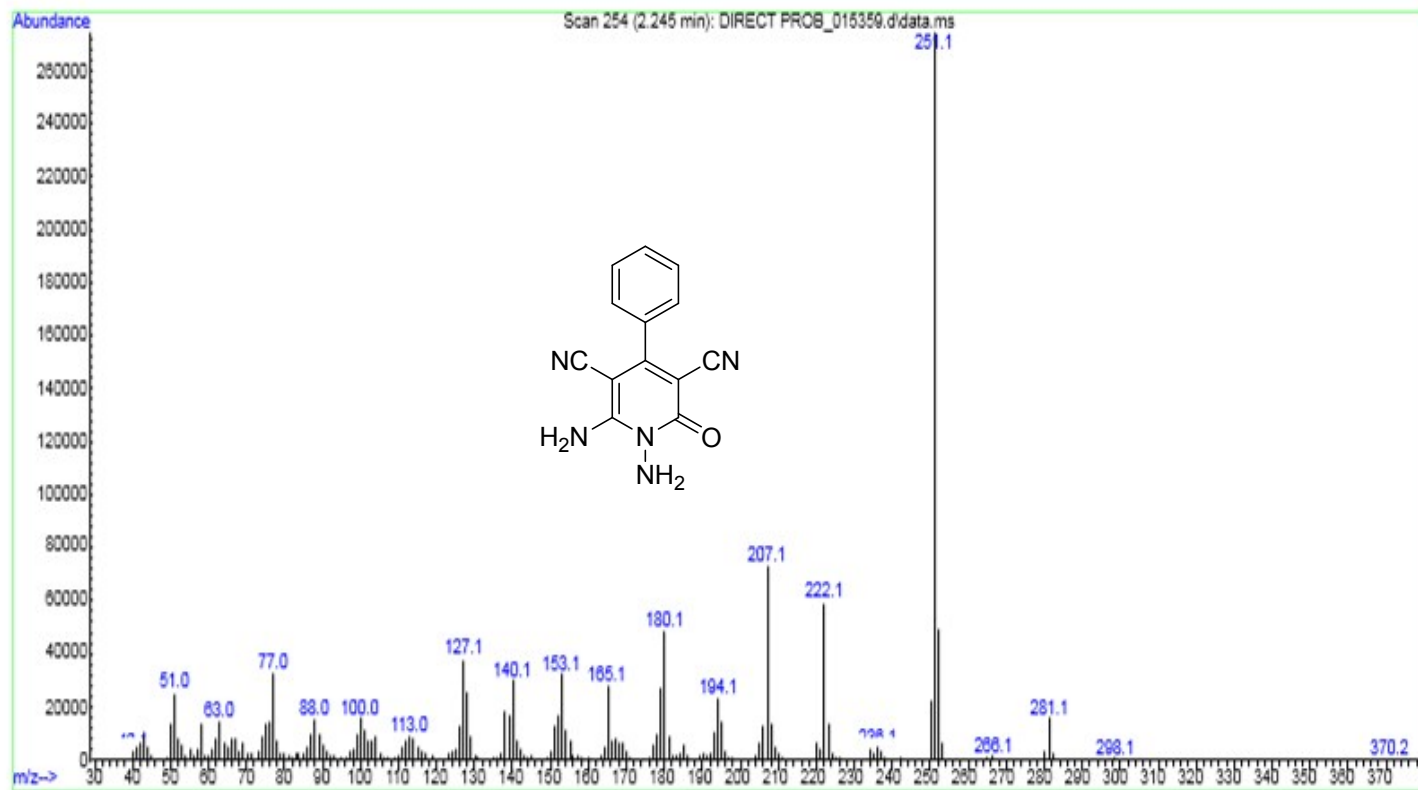

MS of 4f

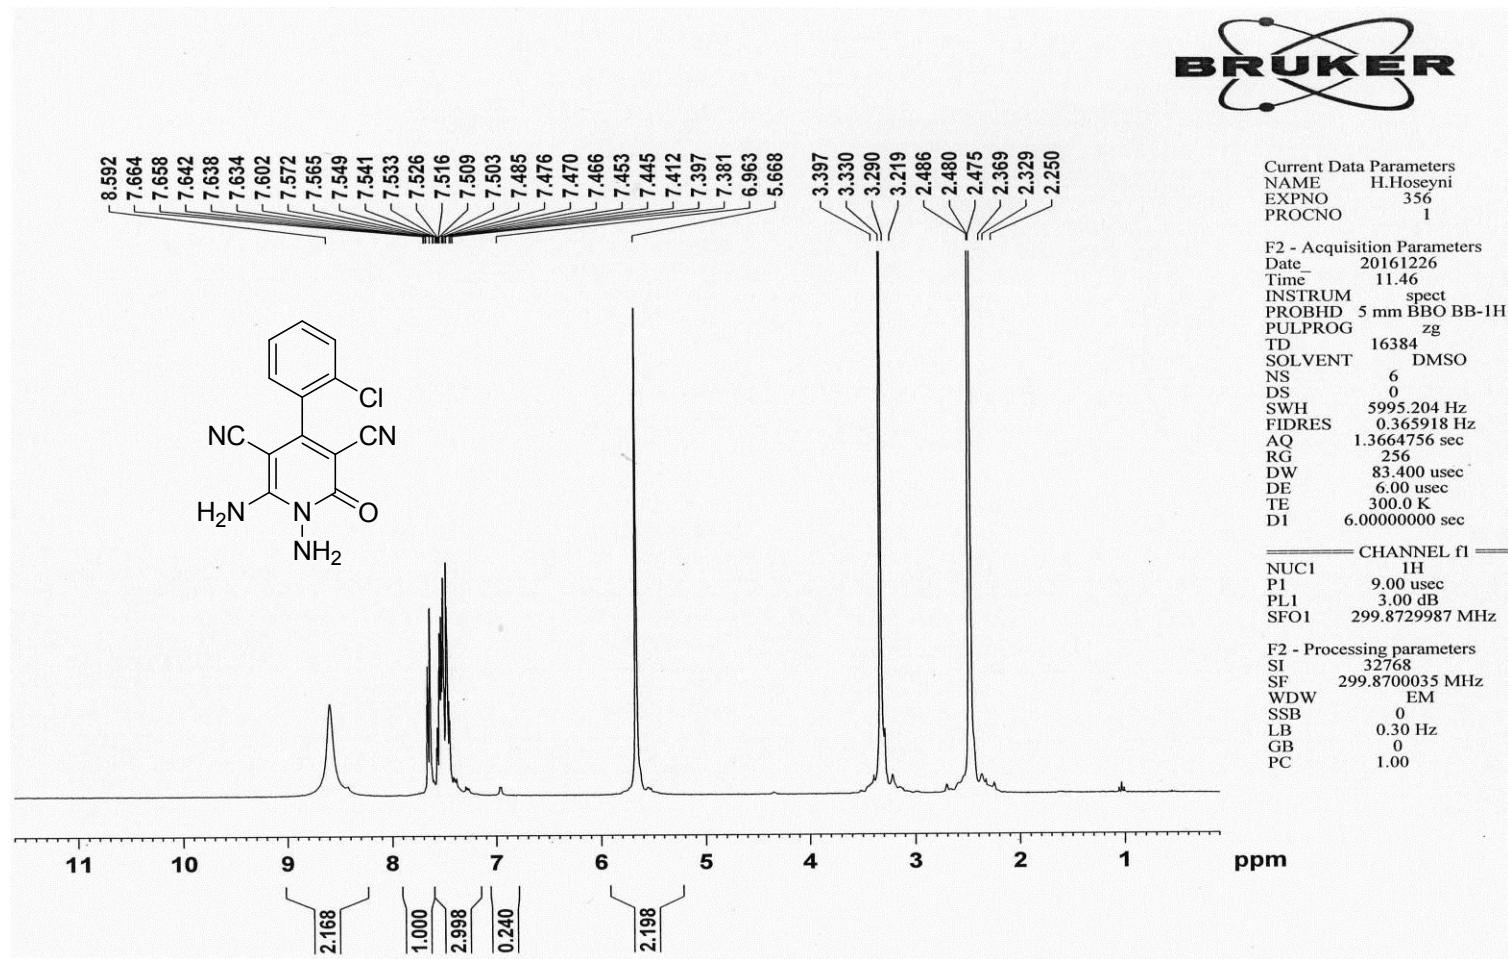



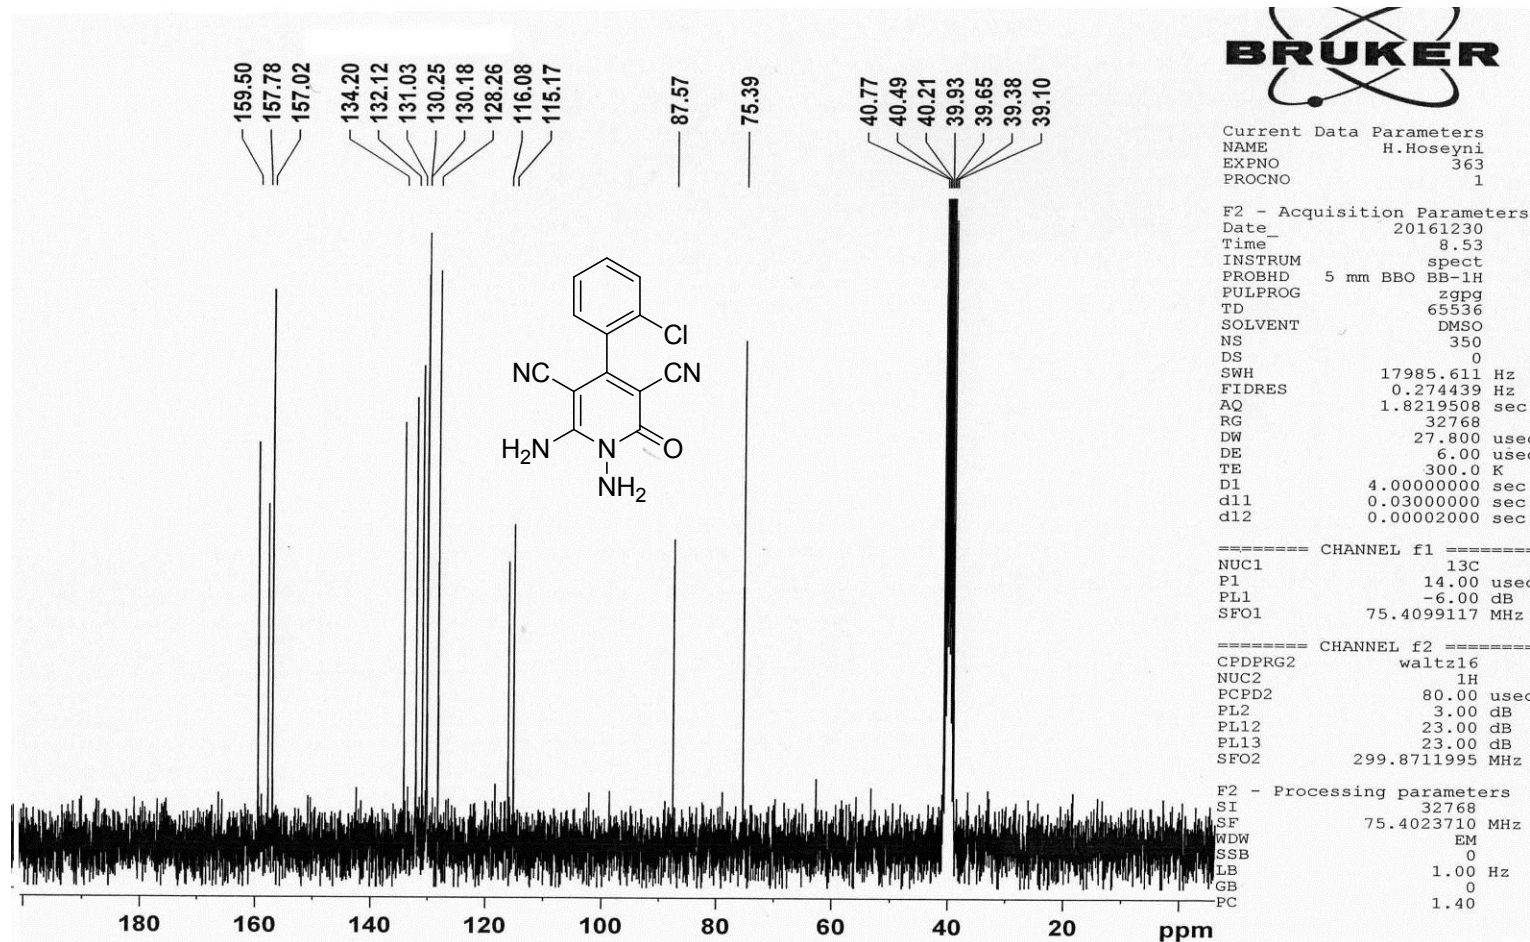<sup>13</sup>C NMR of 4g



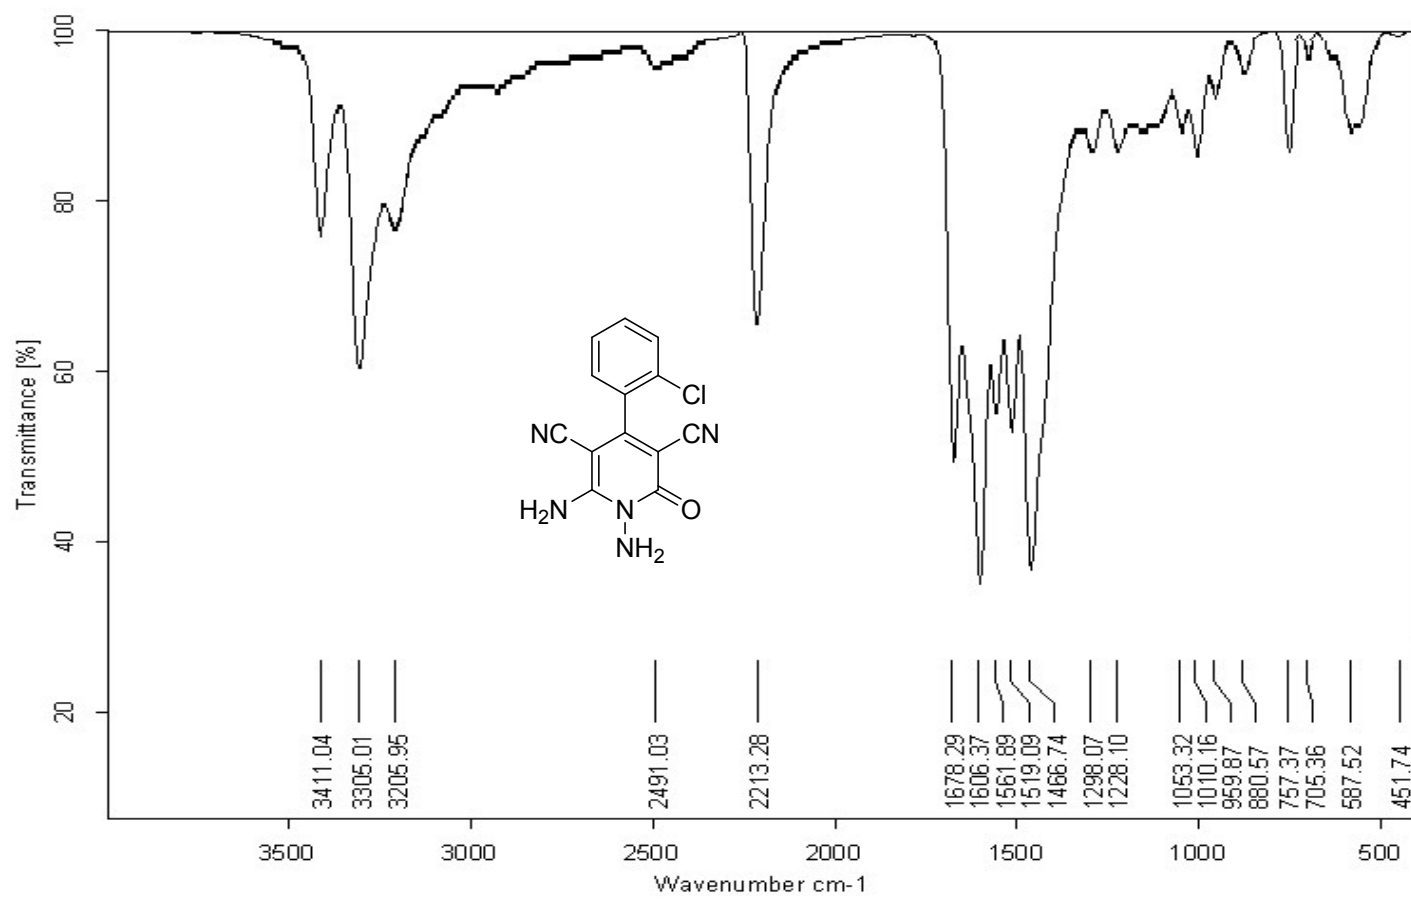

IR of 4g

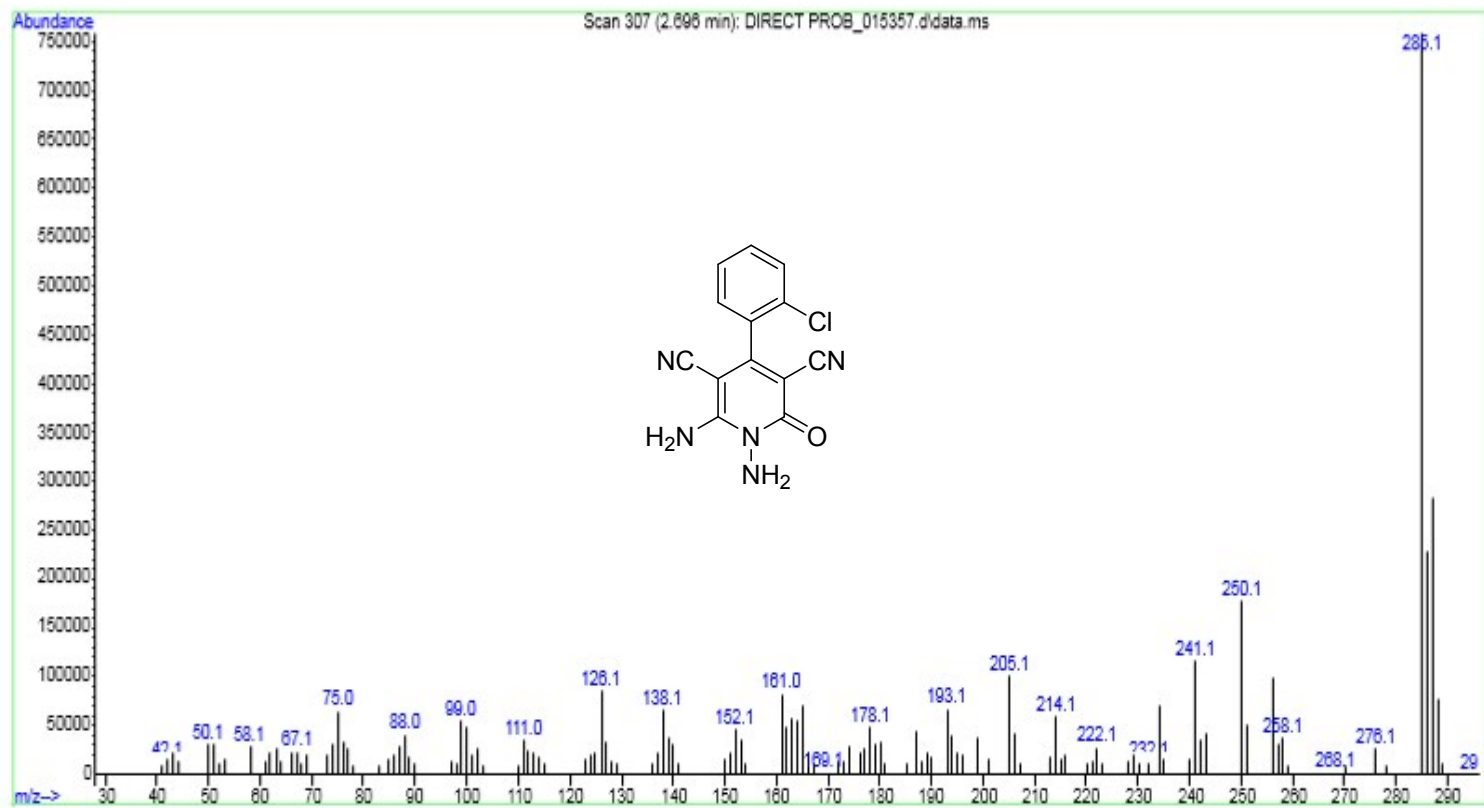

MS of 4g

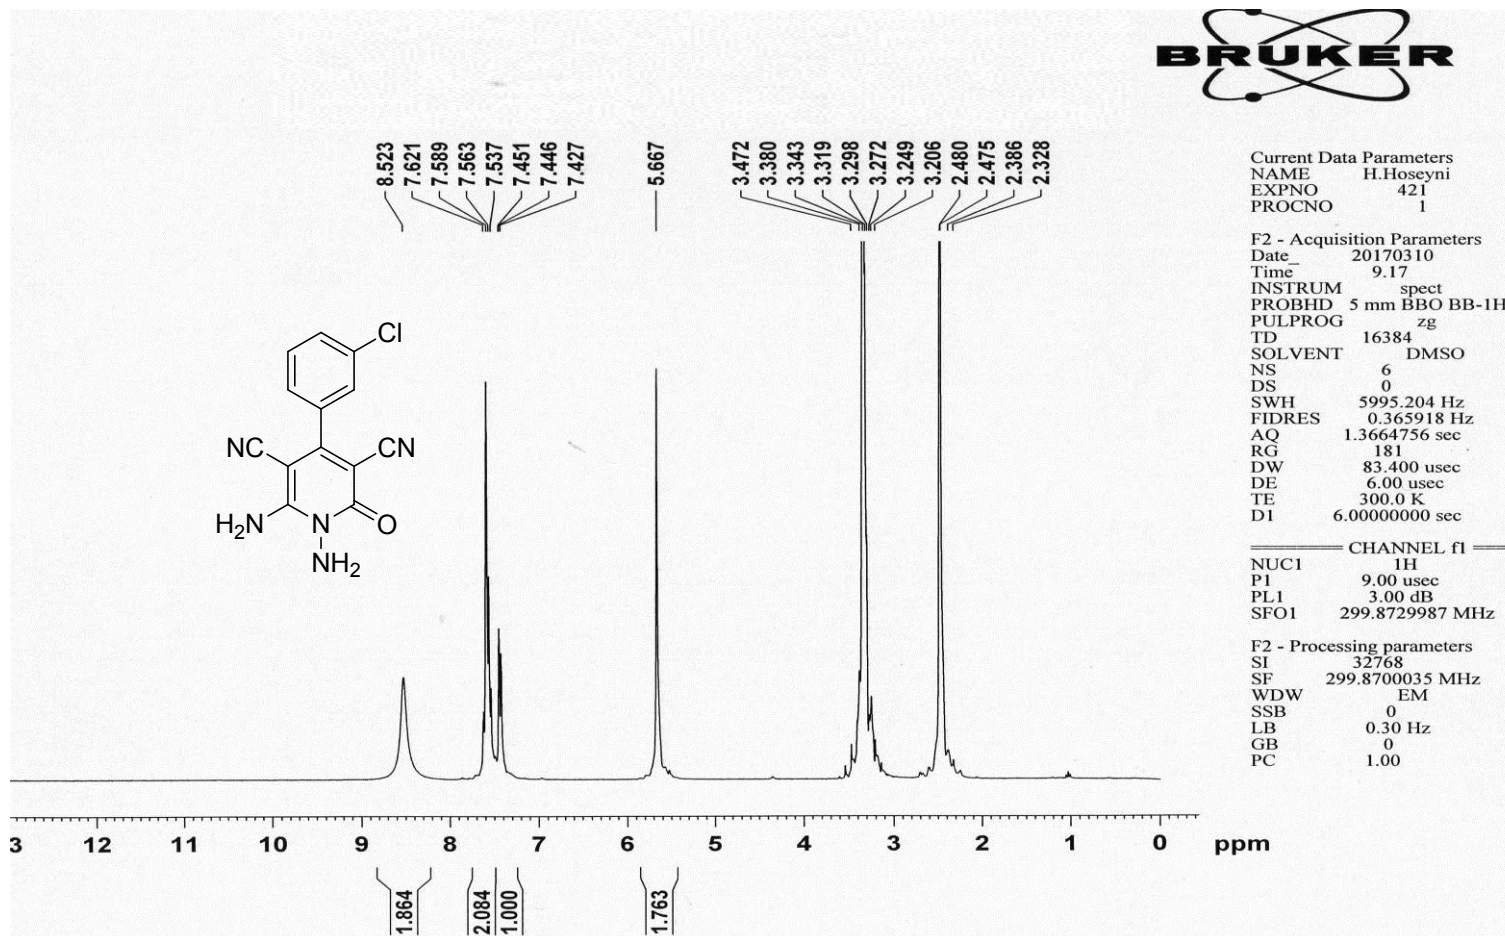

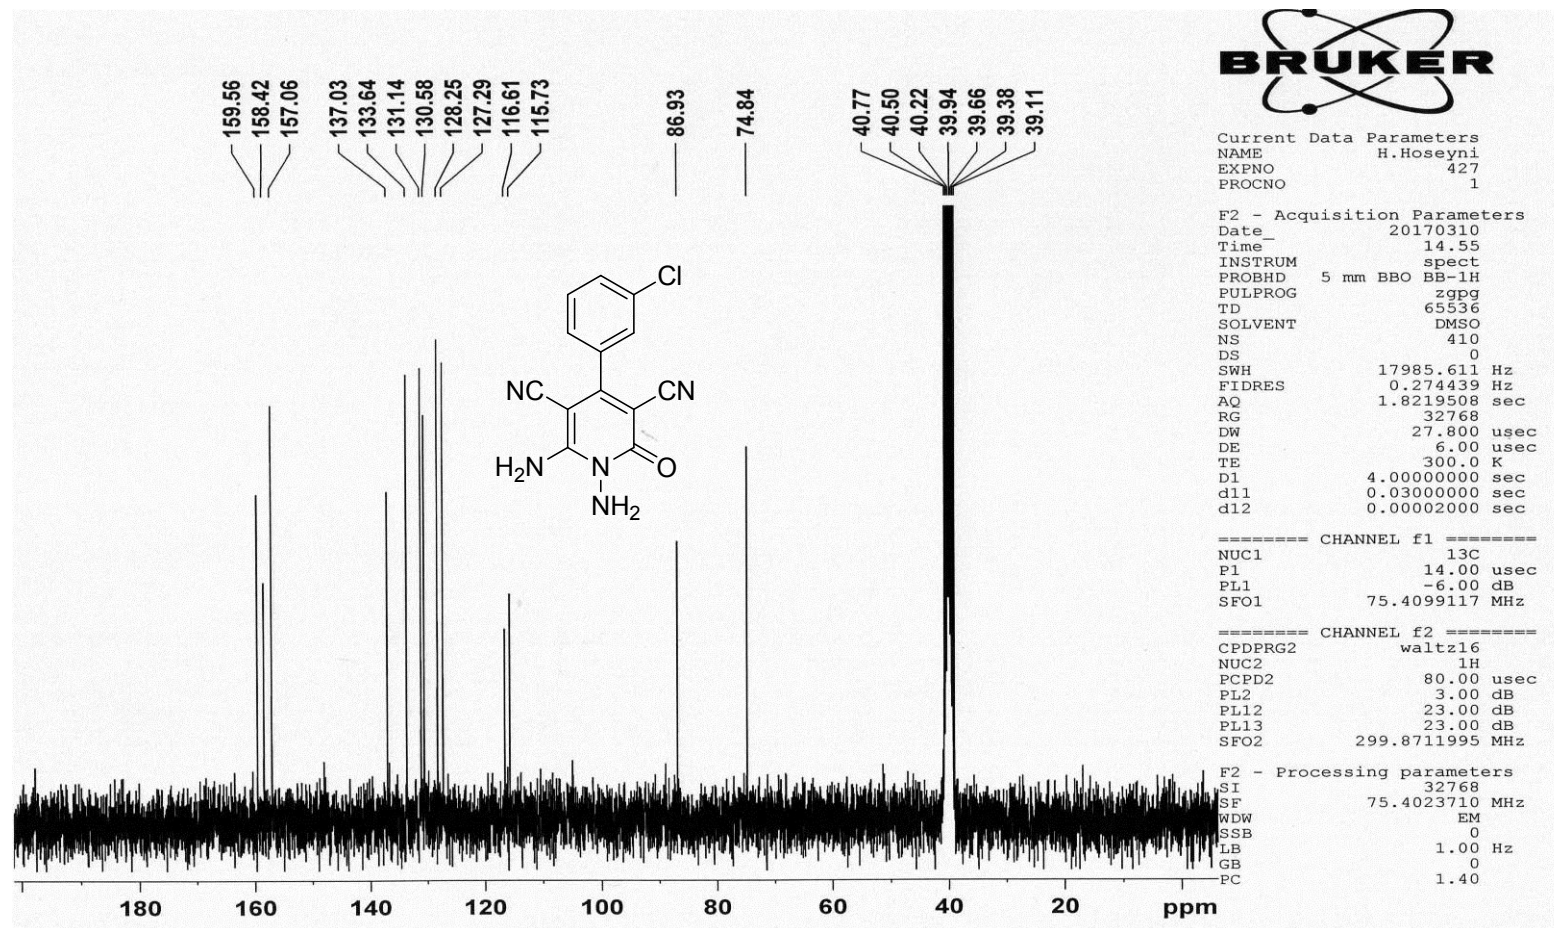<sup>13</sup>C NMR of 4h

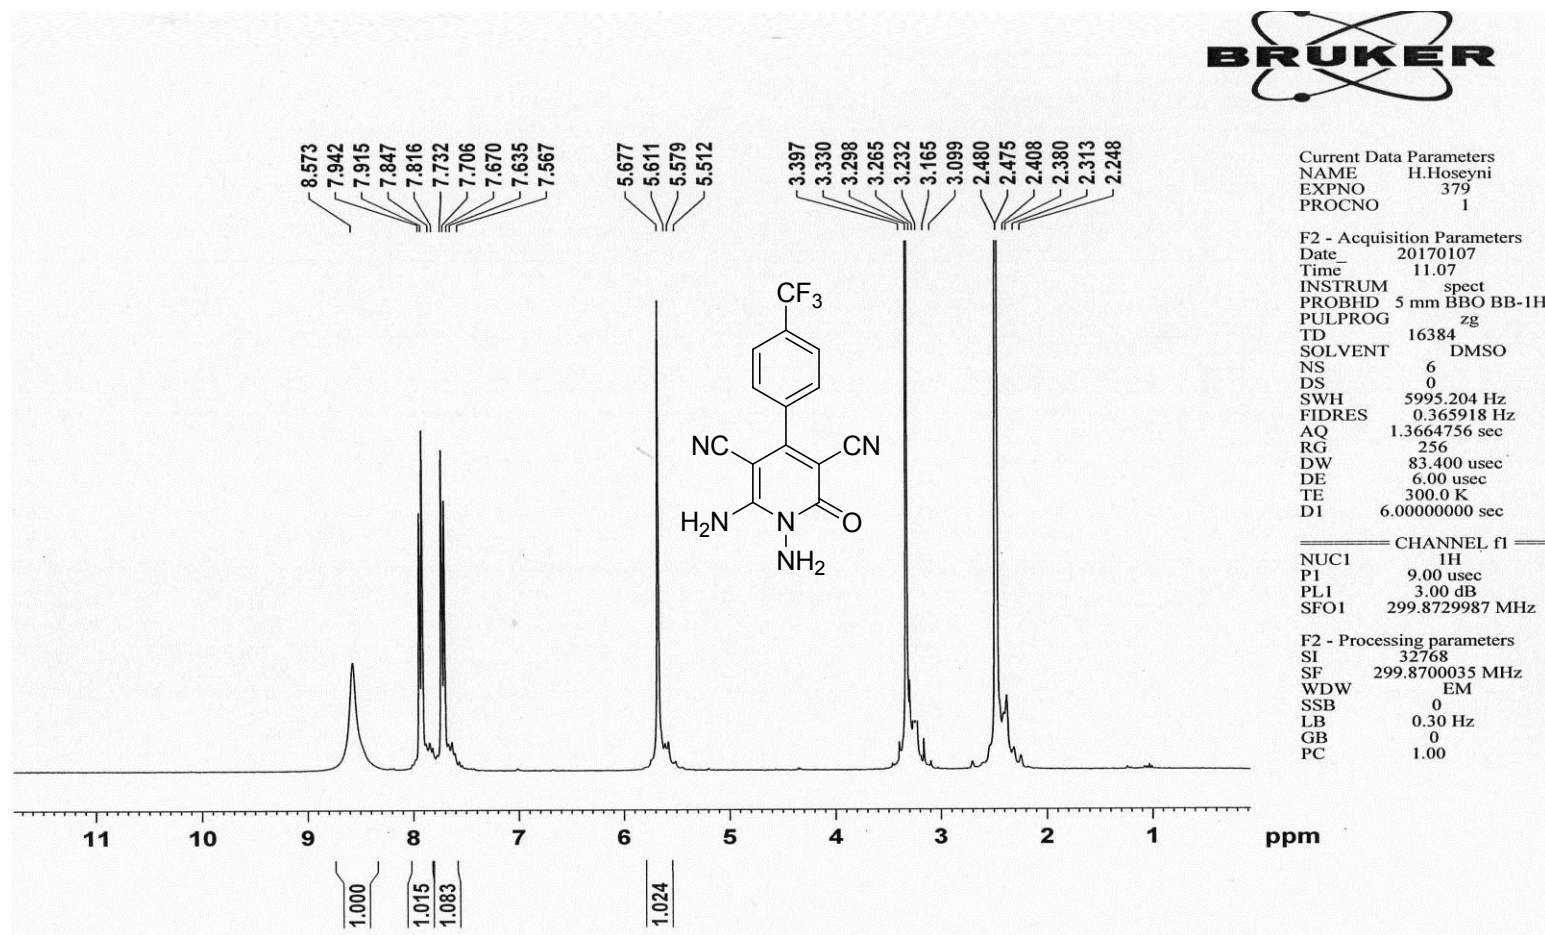**<sup>1</sup>H NMR of 4i**

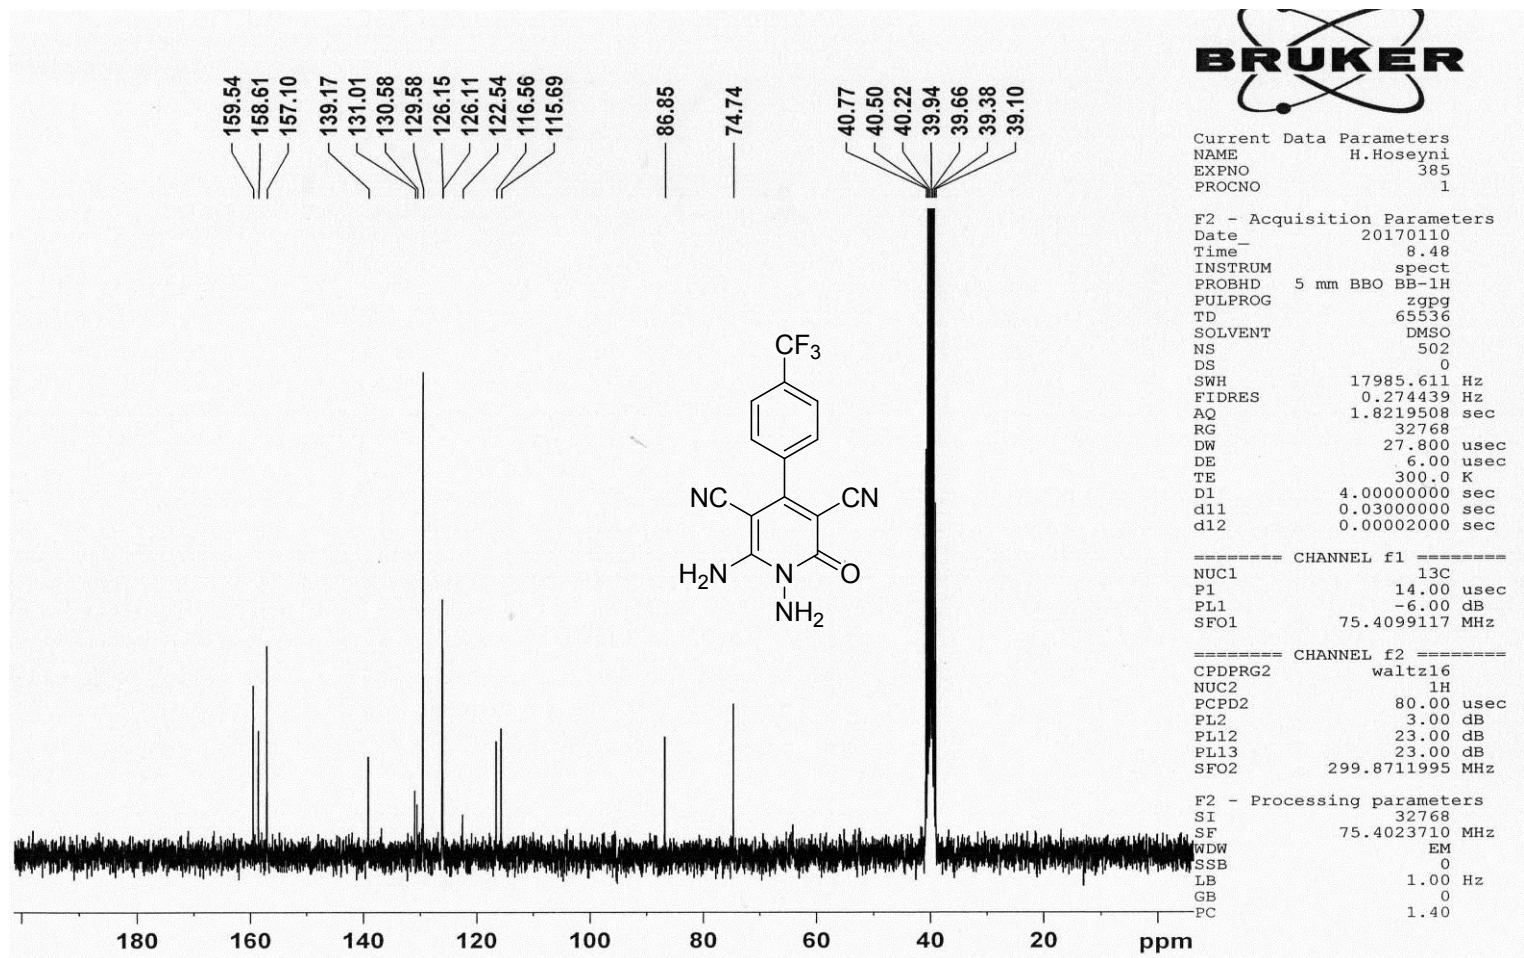**<sup>13</sup>C NMR of 4i**



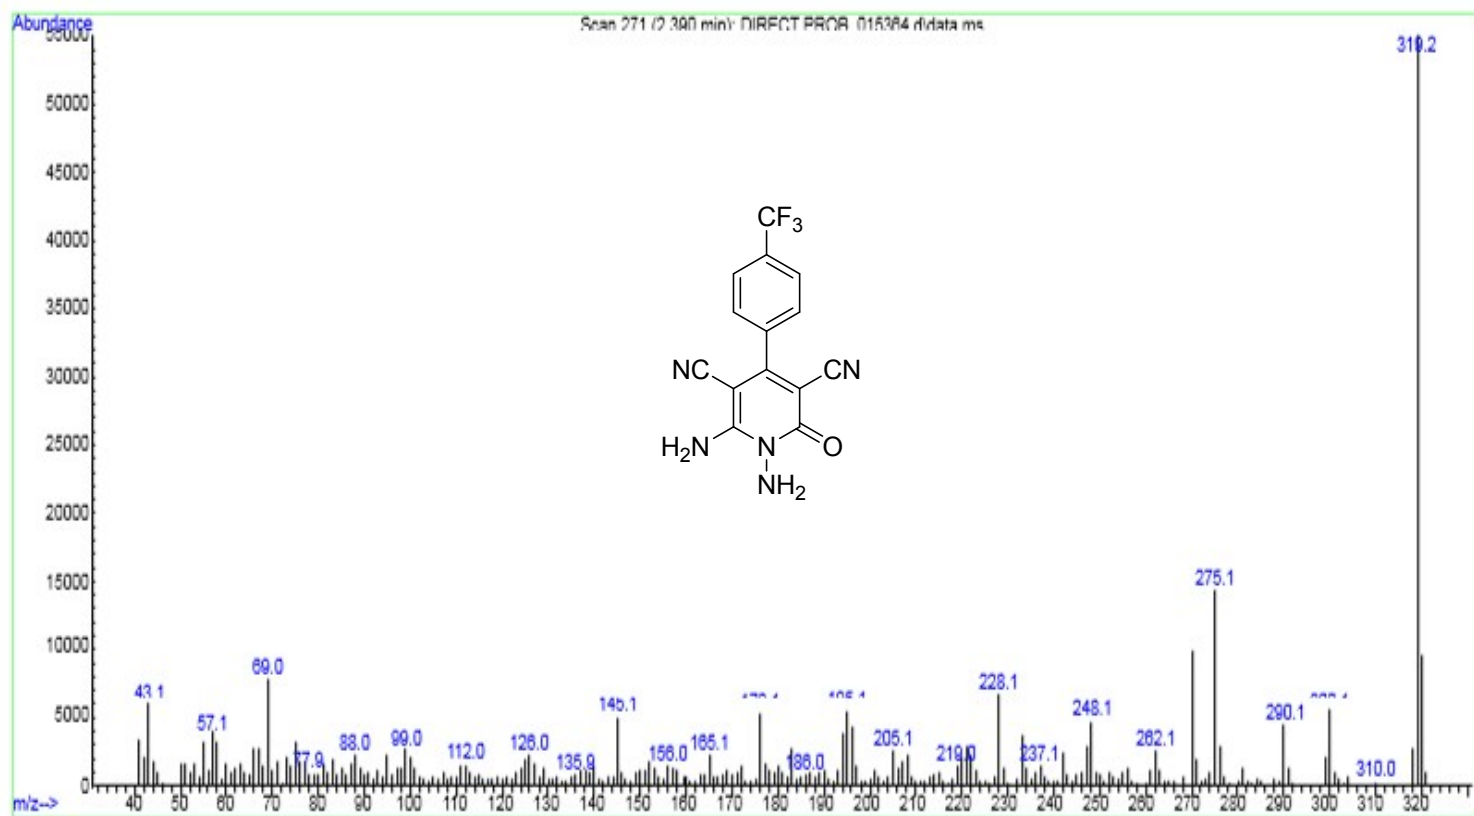

MS of 4i

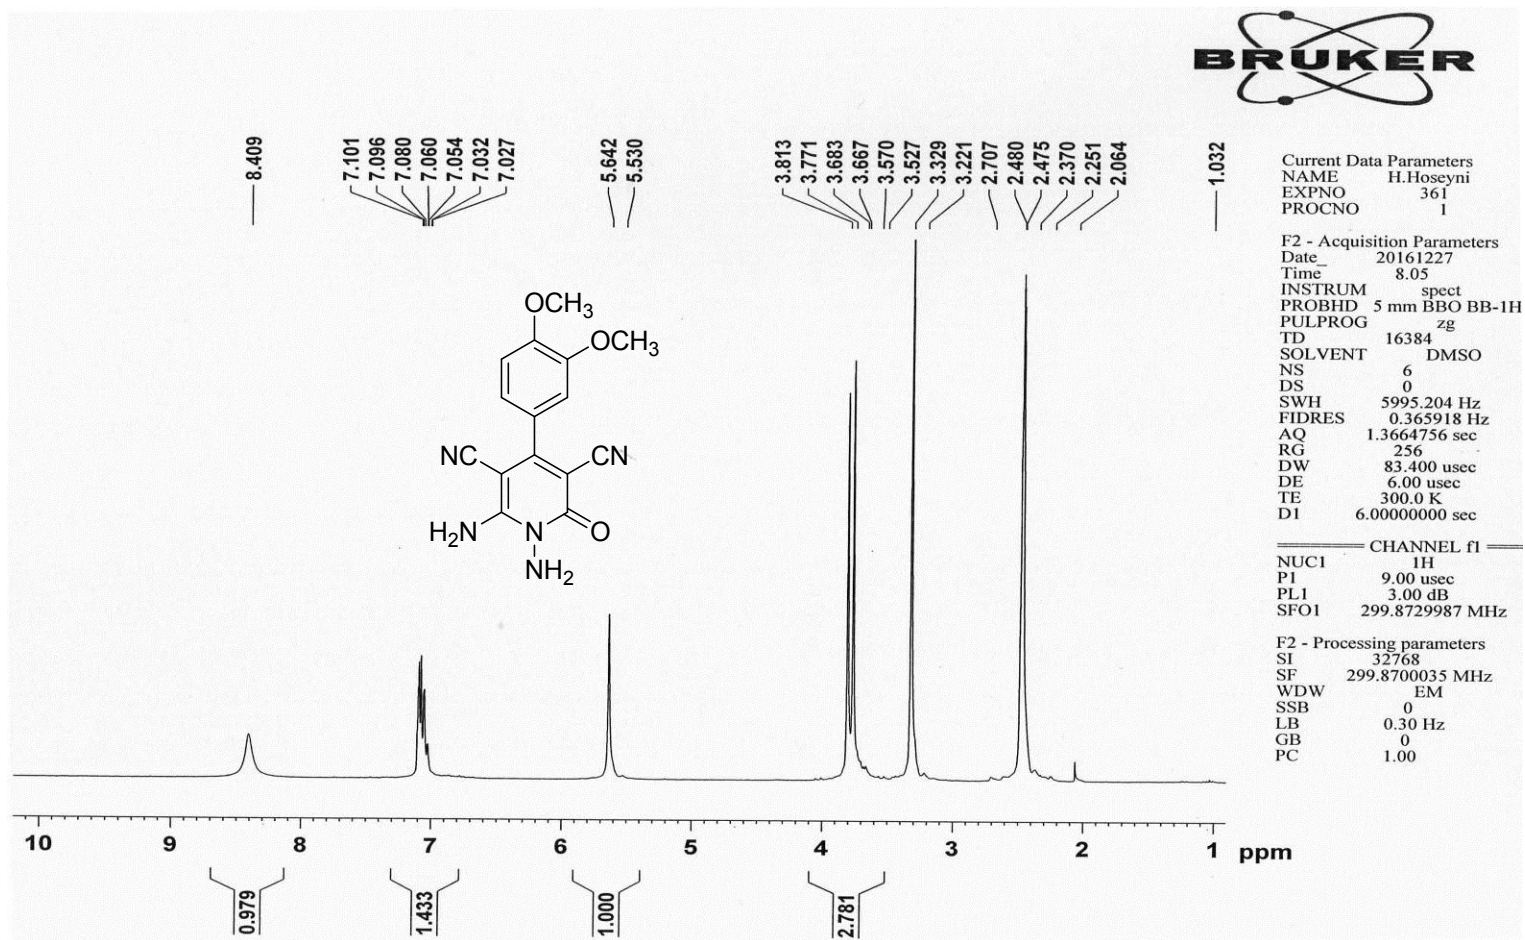



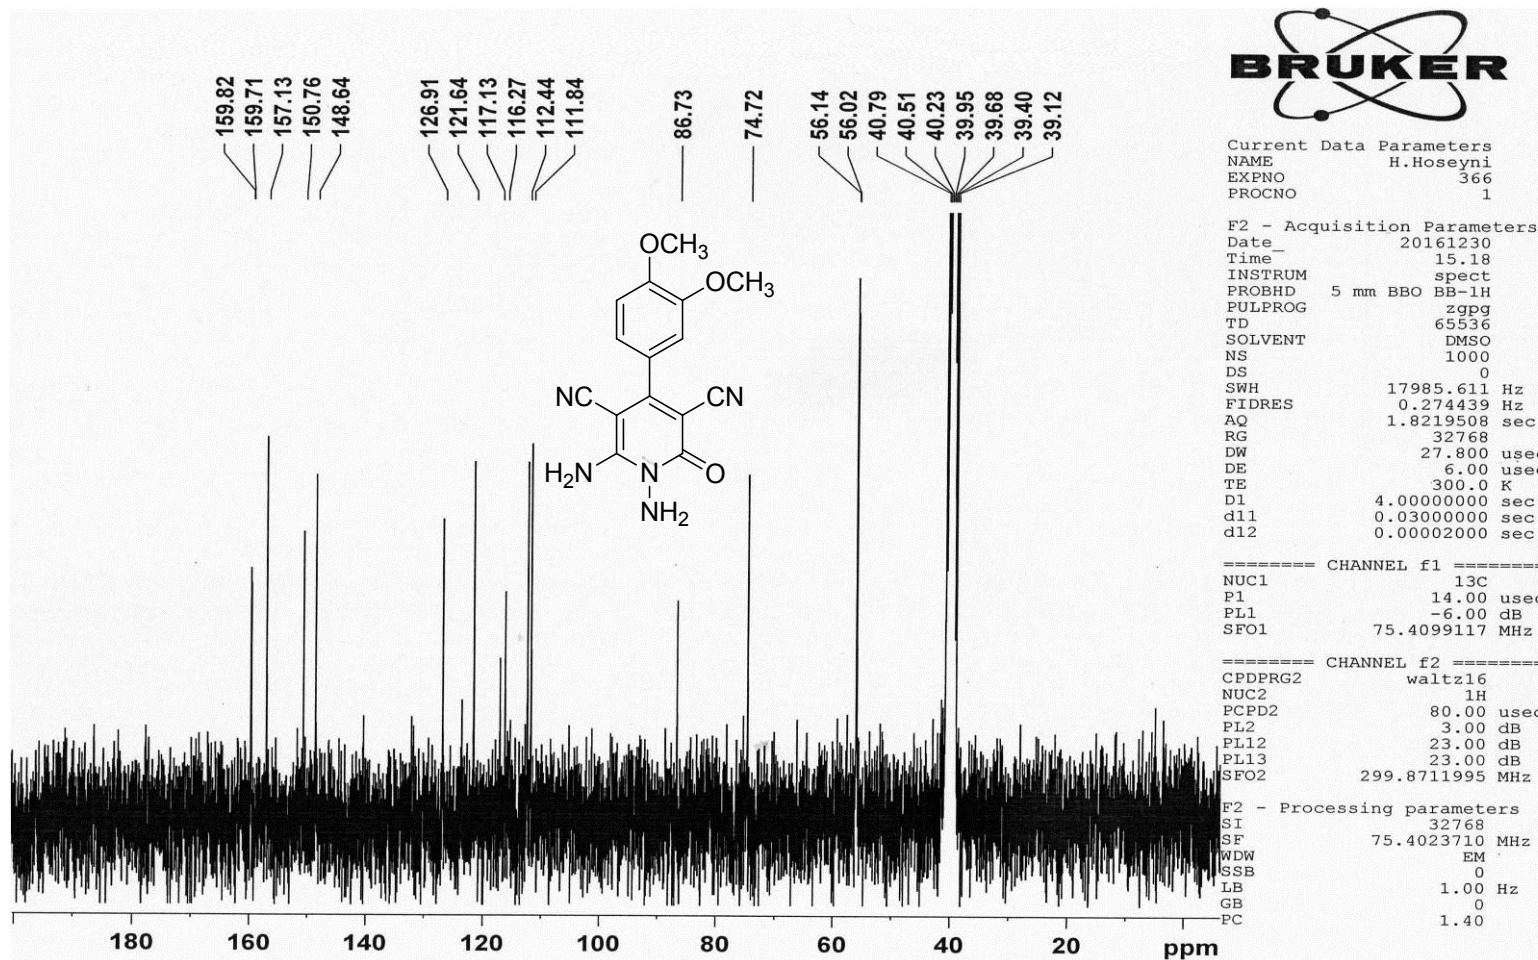<sup>13</sup>C NMR of 4j

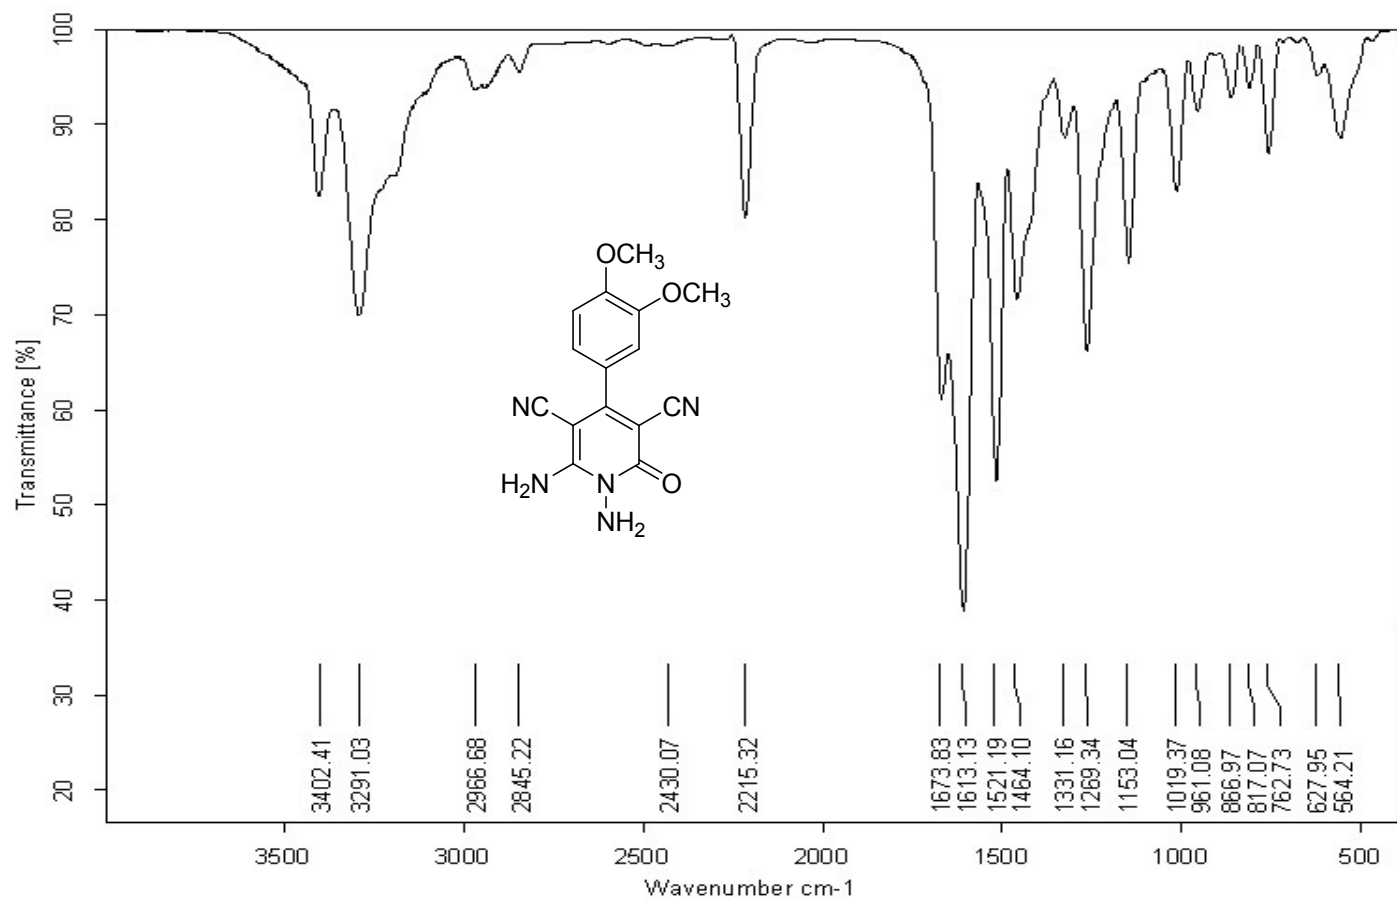

IR of 4j

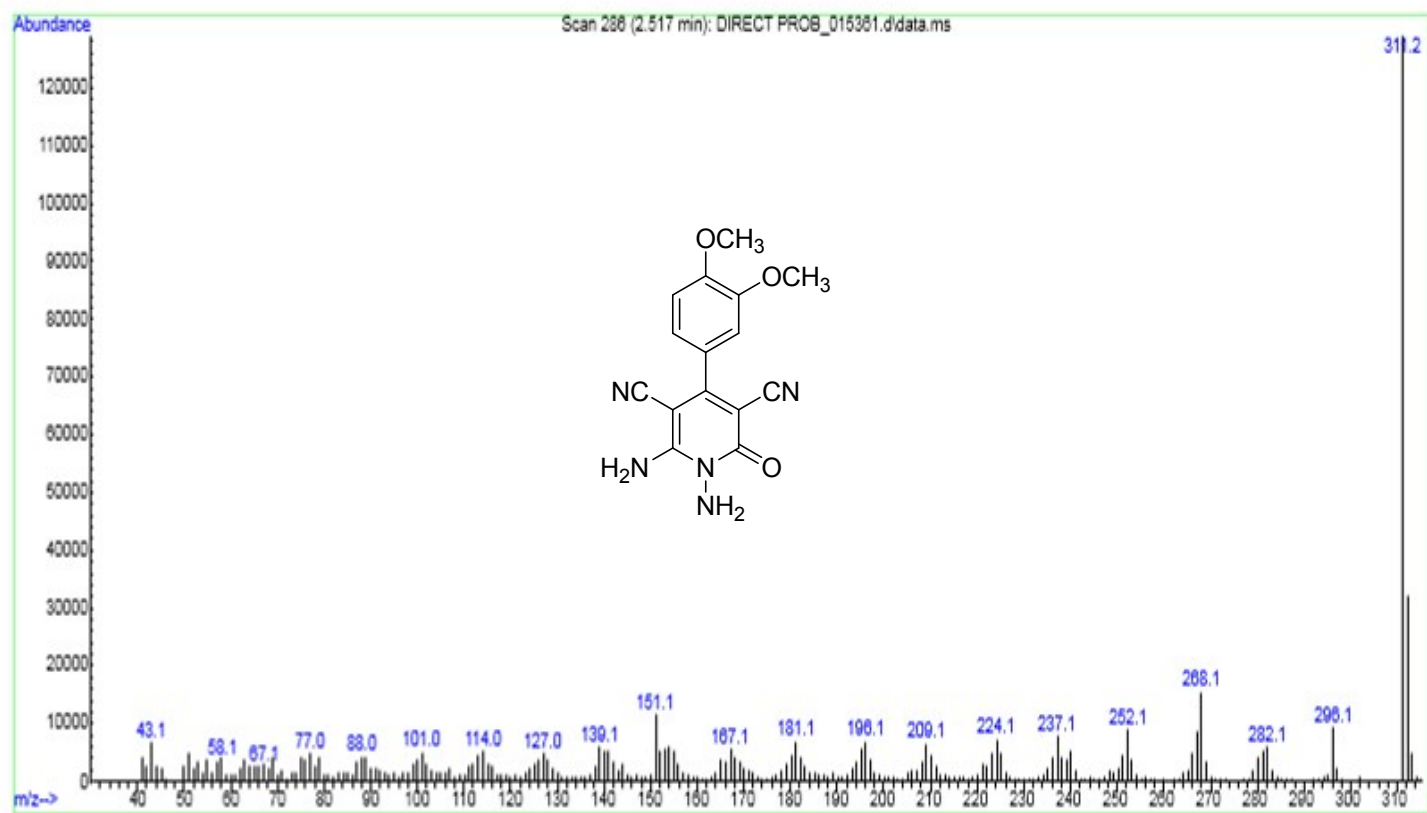

MS of 4j

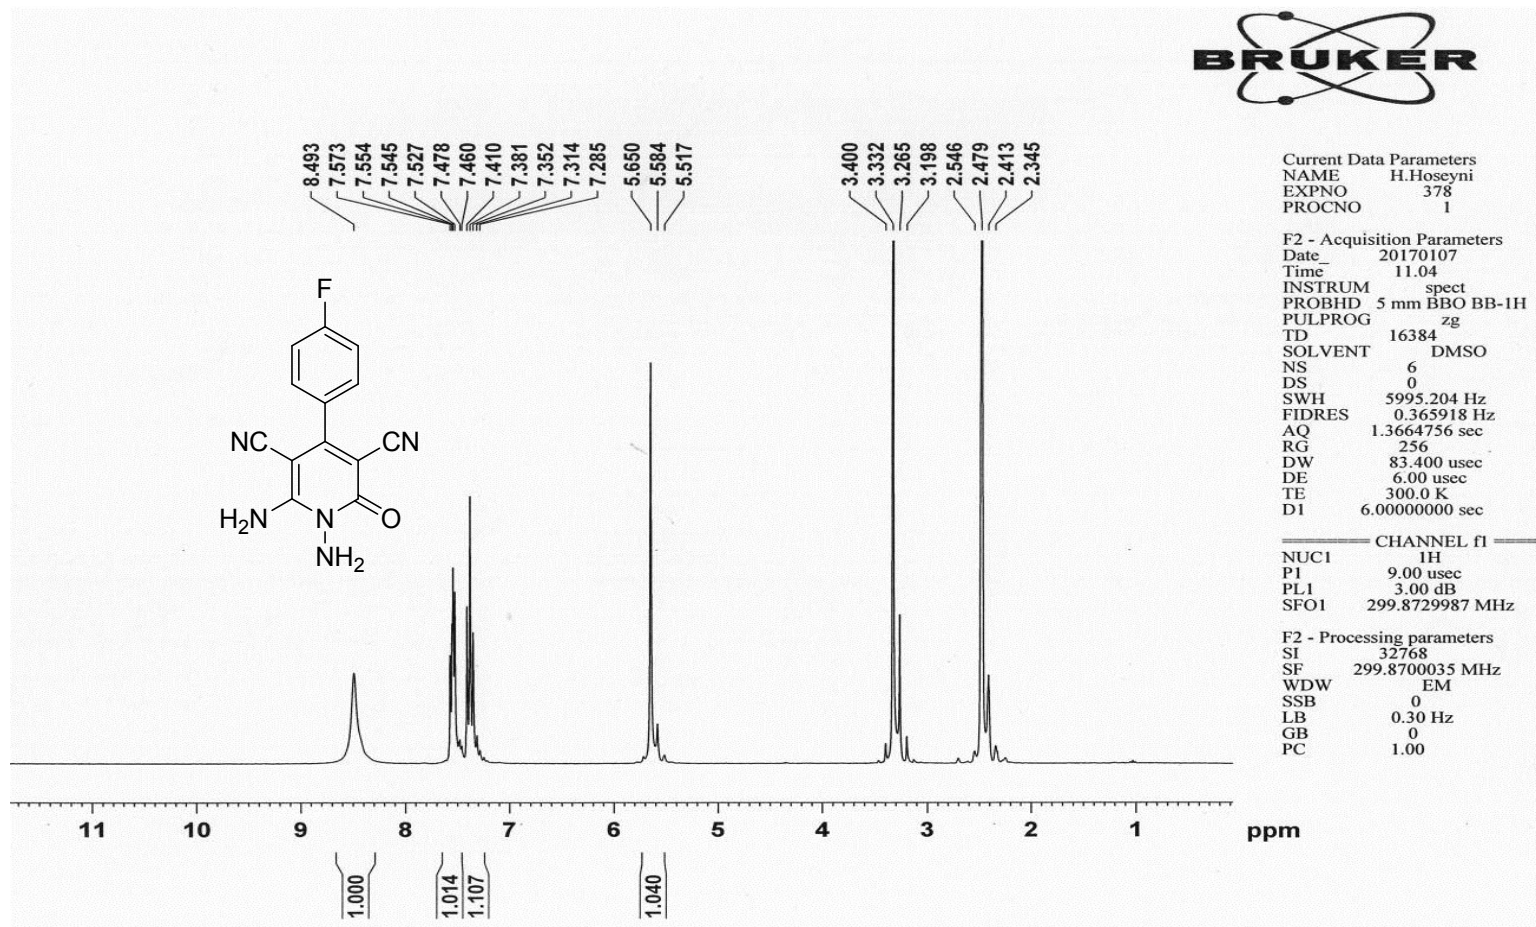<sup>1</sup>H NMR of 4k

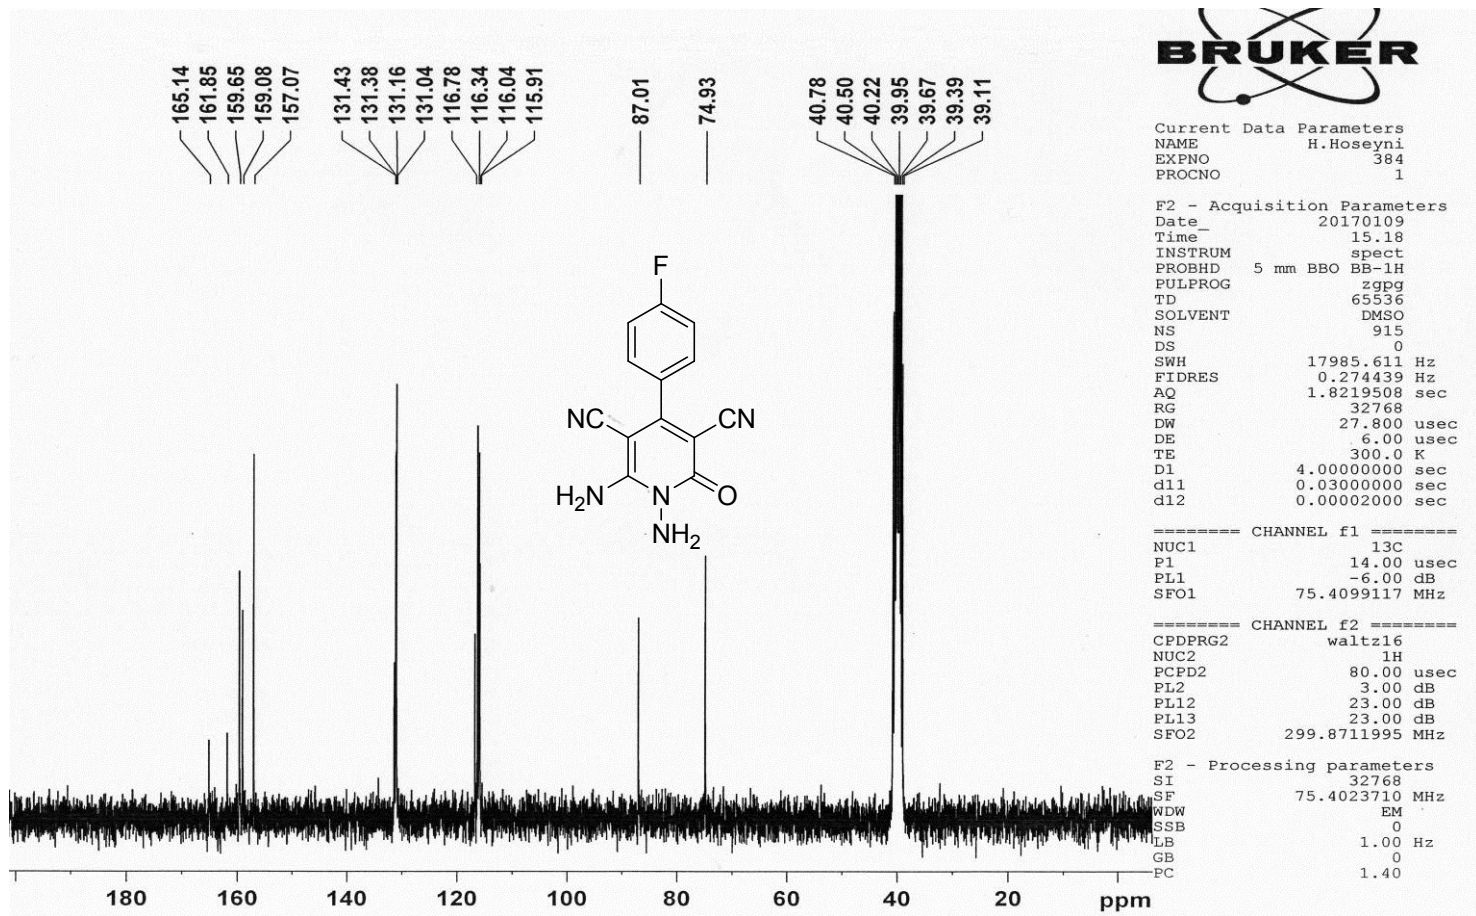<sup>13</sup>C NMR of 4k

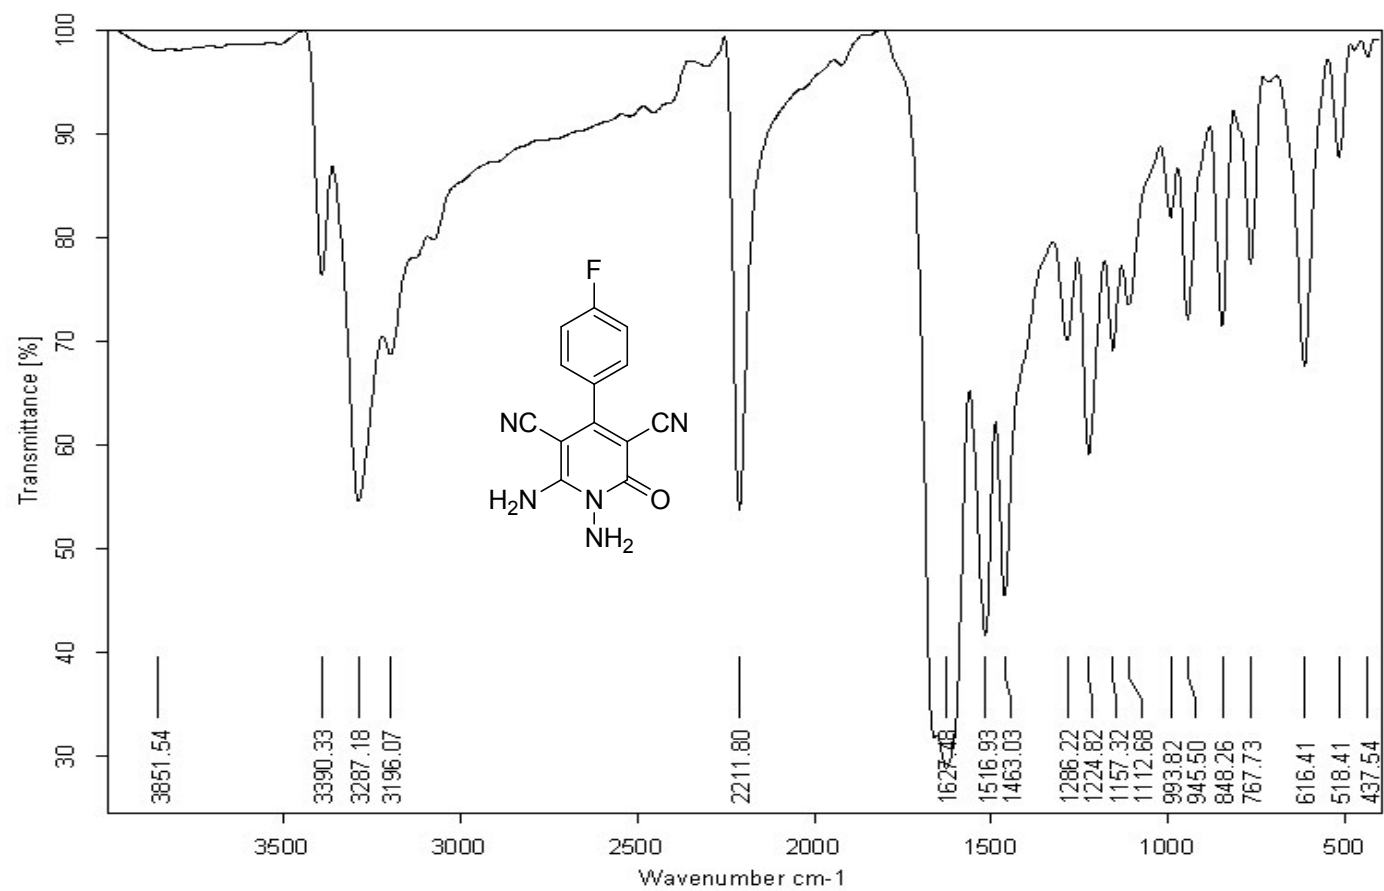

IR of 4k

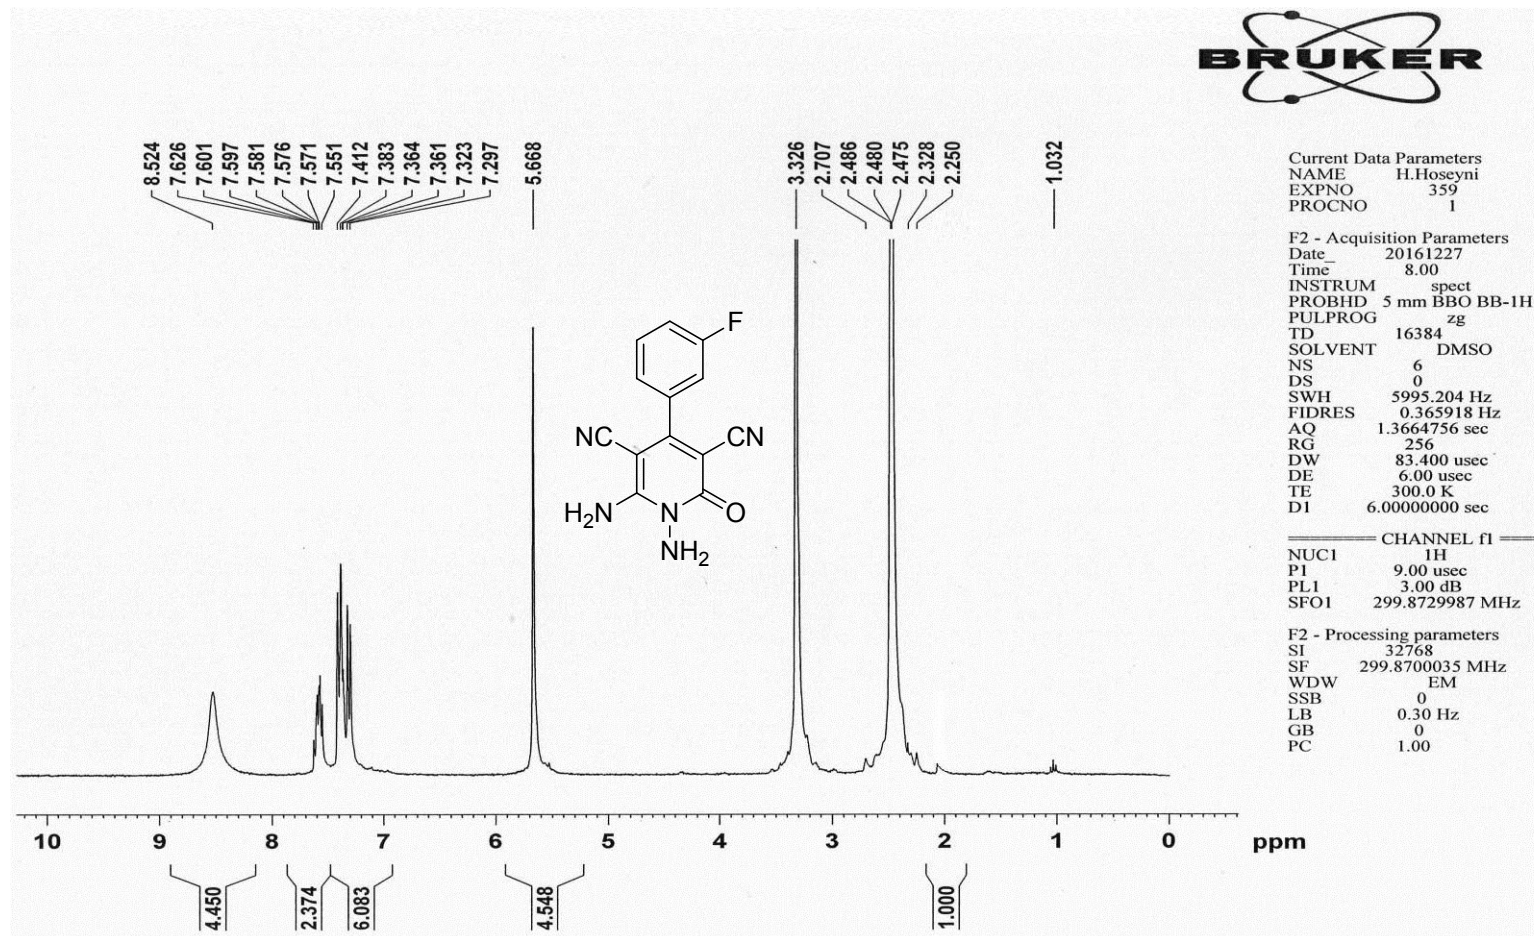



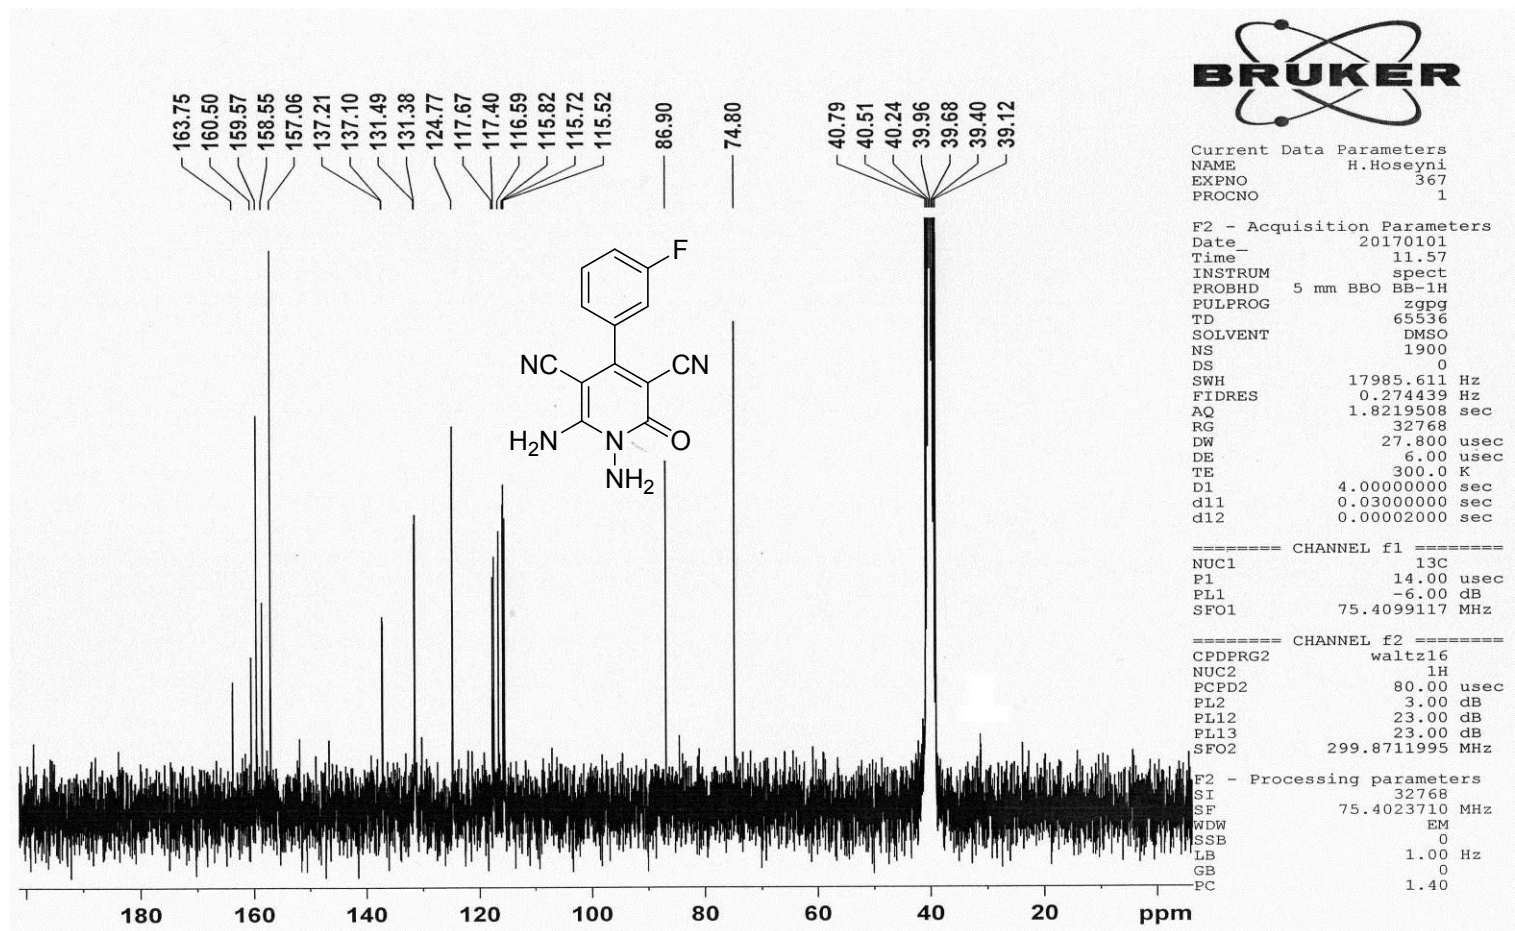

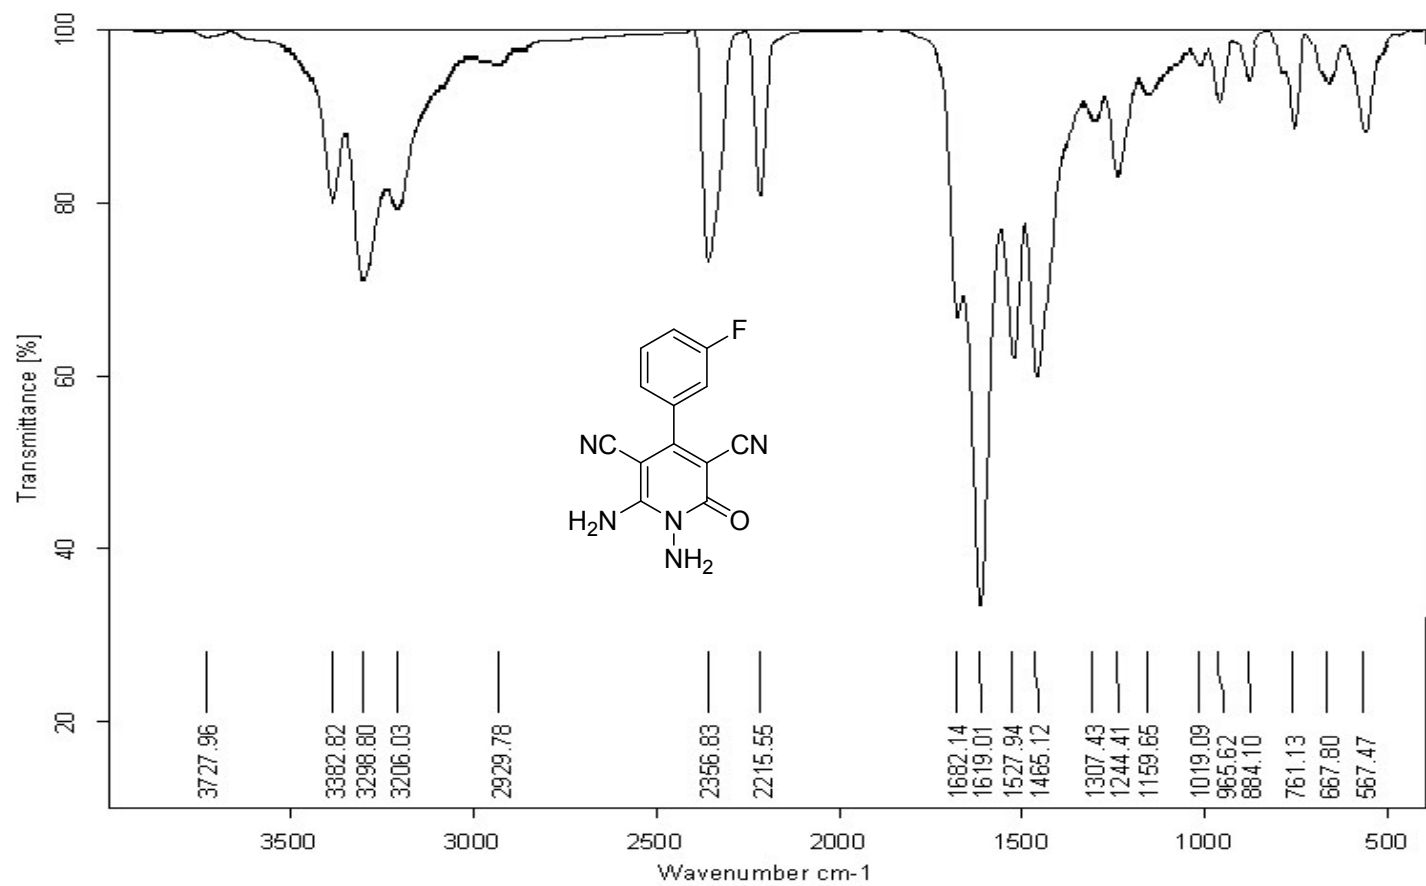**IR of 4l**

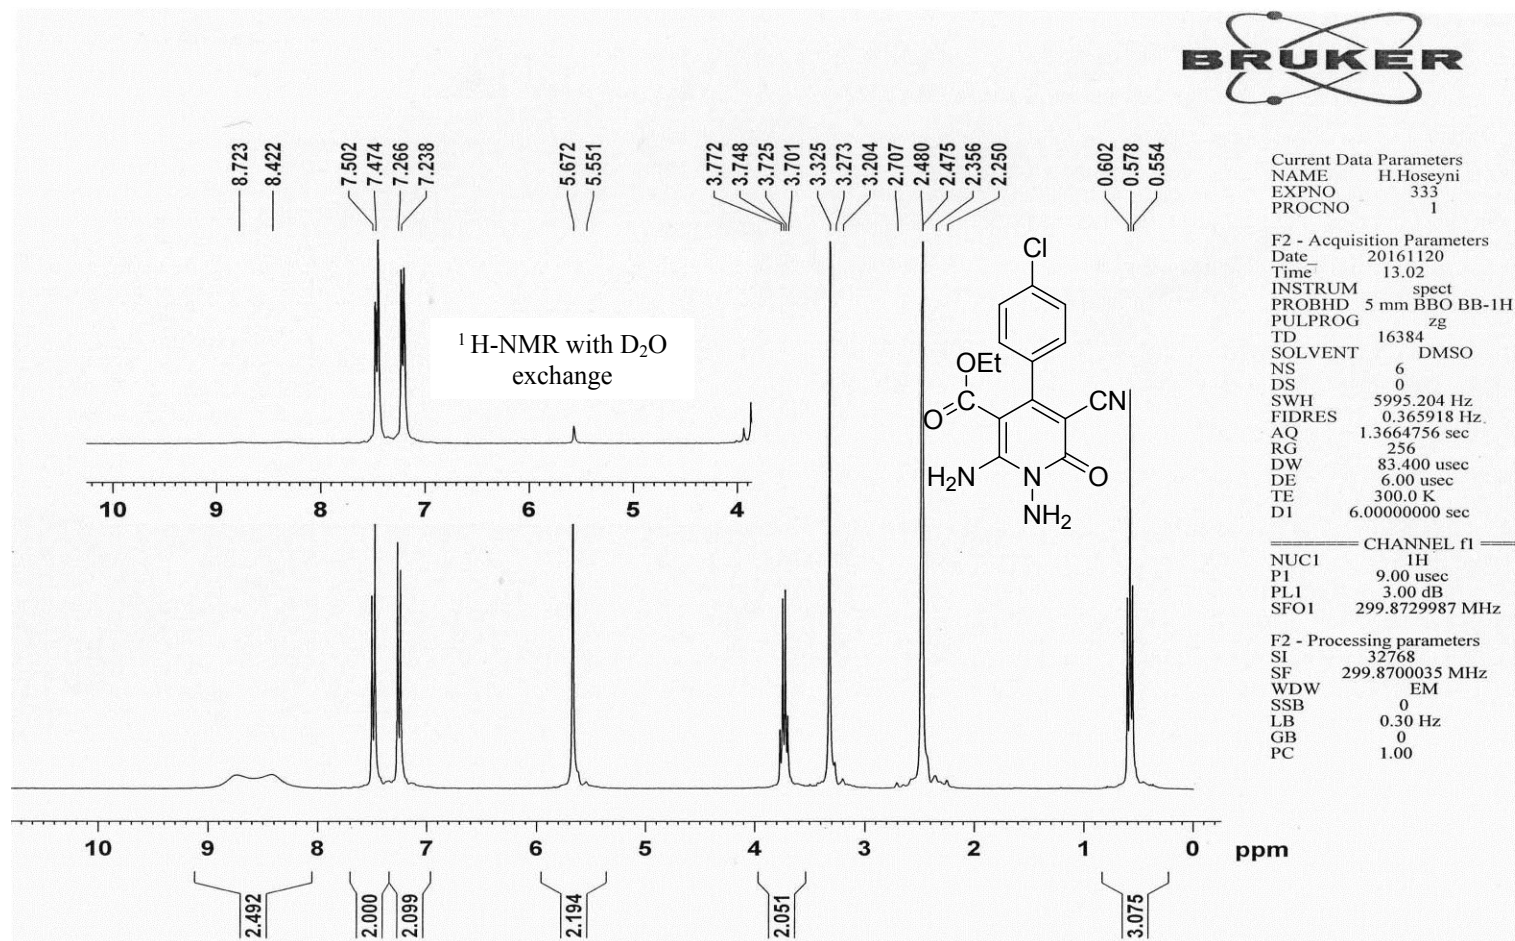<sup>1</sup>H NMR of 5a

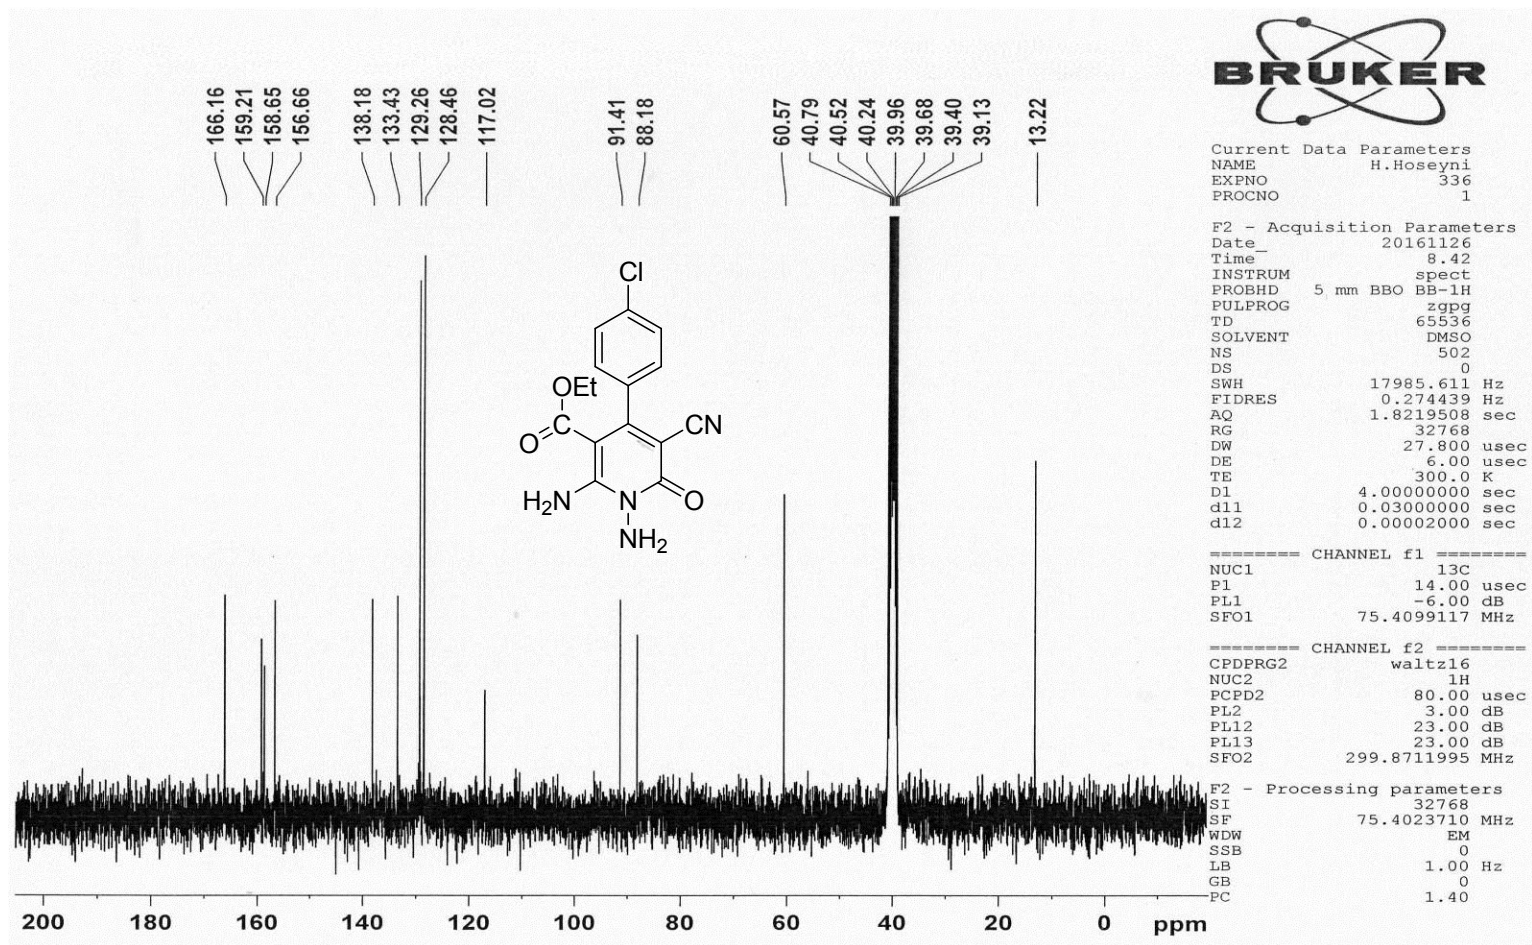<sup>13</sup>C NMR of 5a

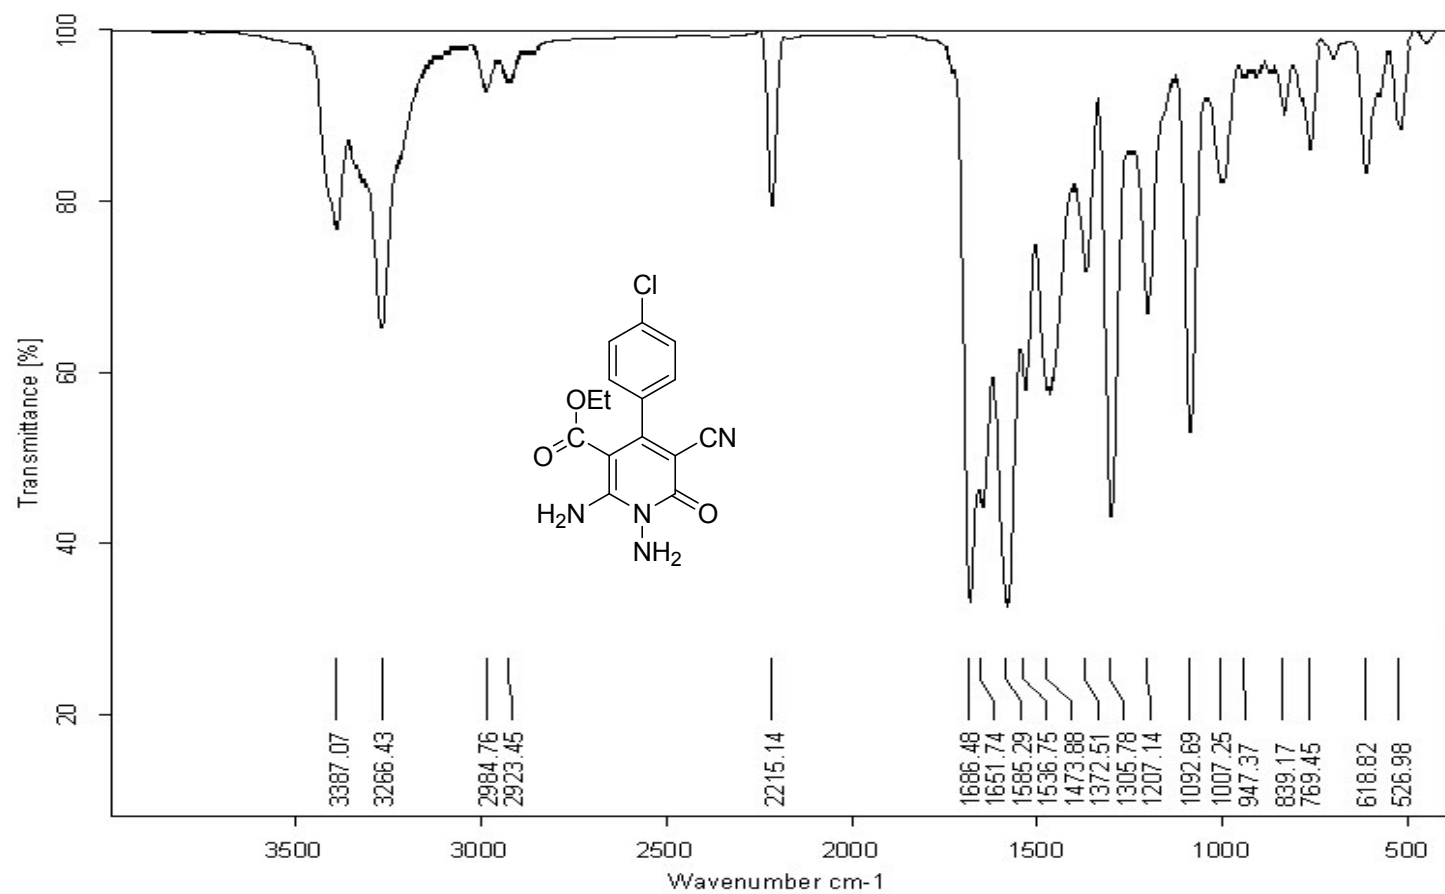

IR of 5a

Abundance

Scan 201 (1.456 min): 30000947.D

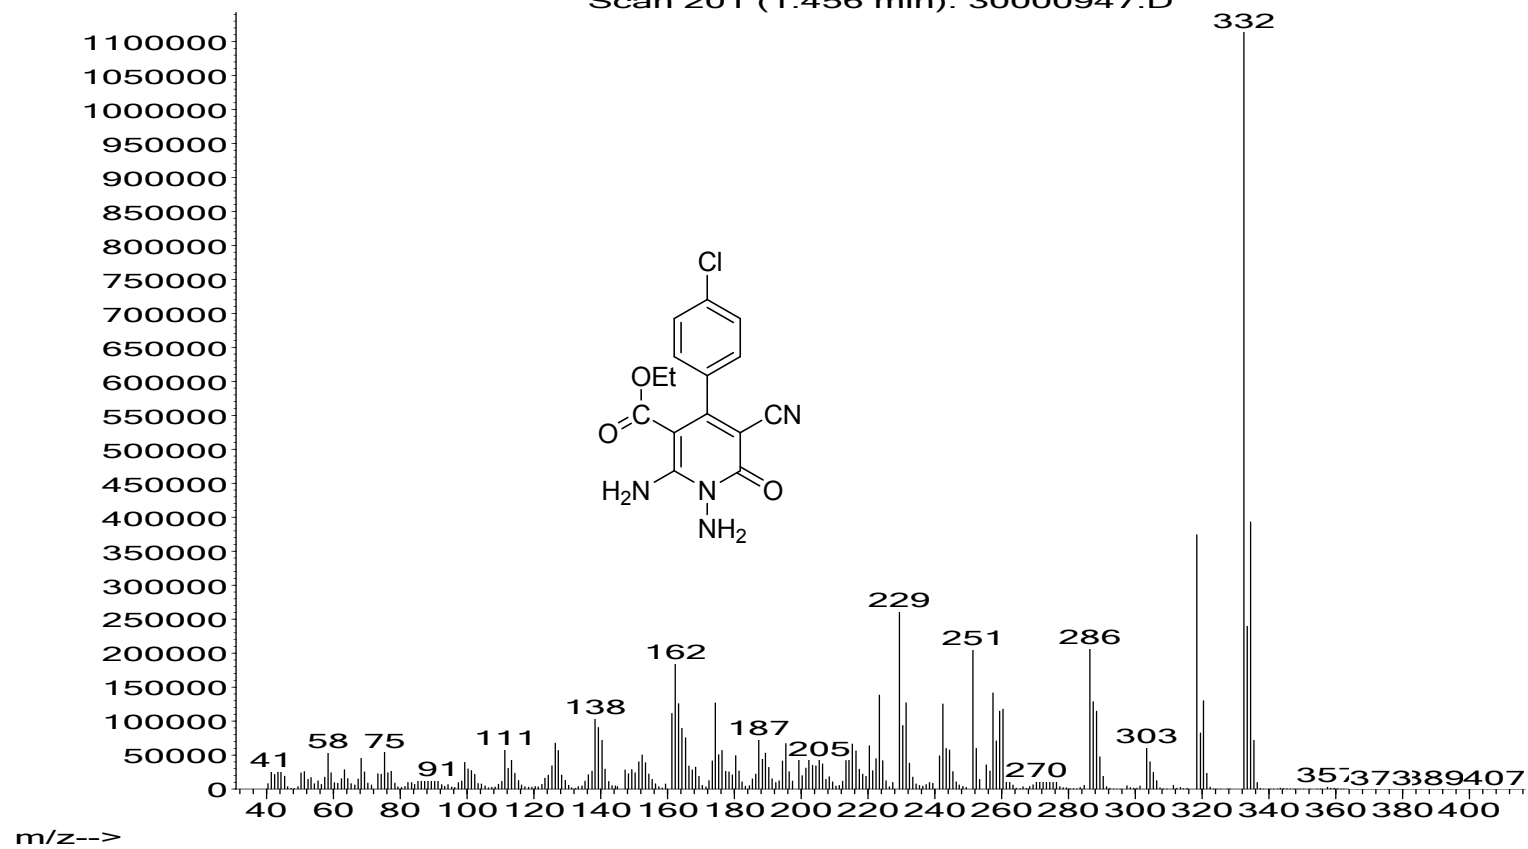

MS of 5a

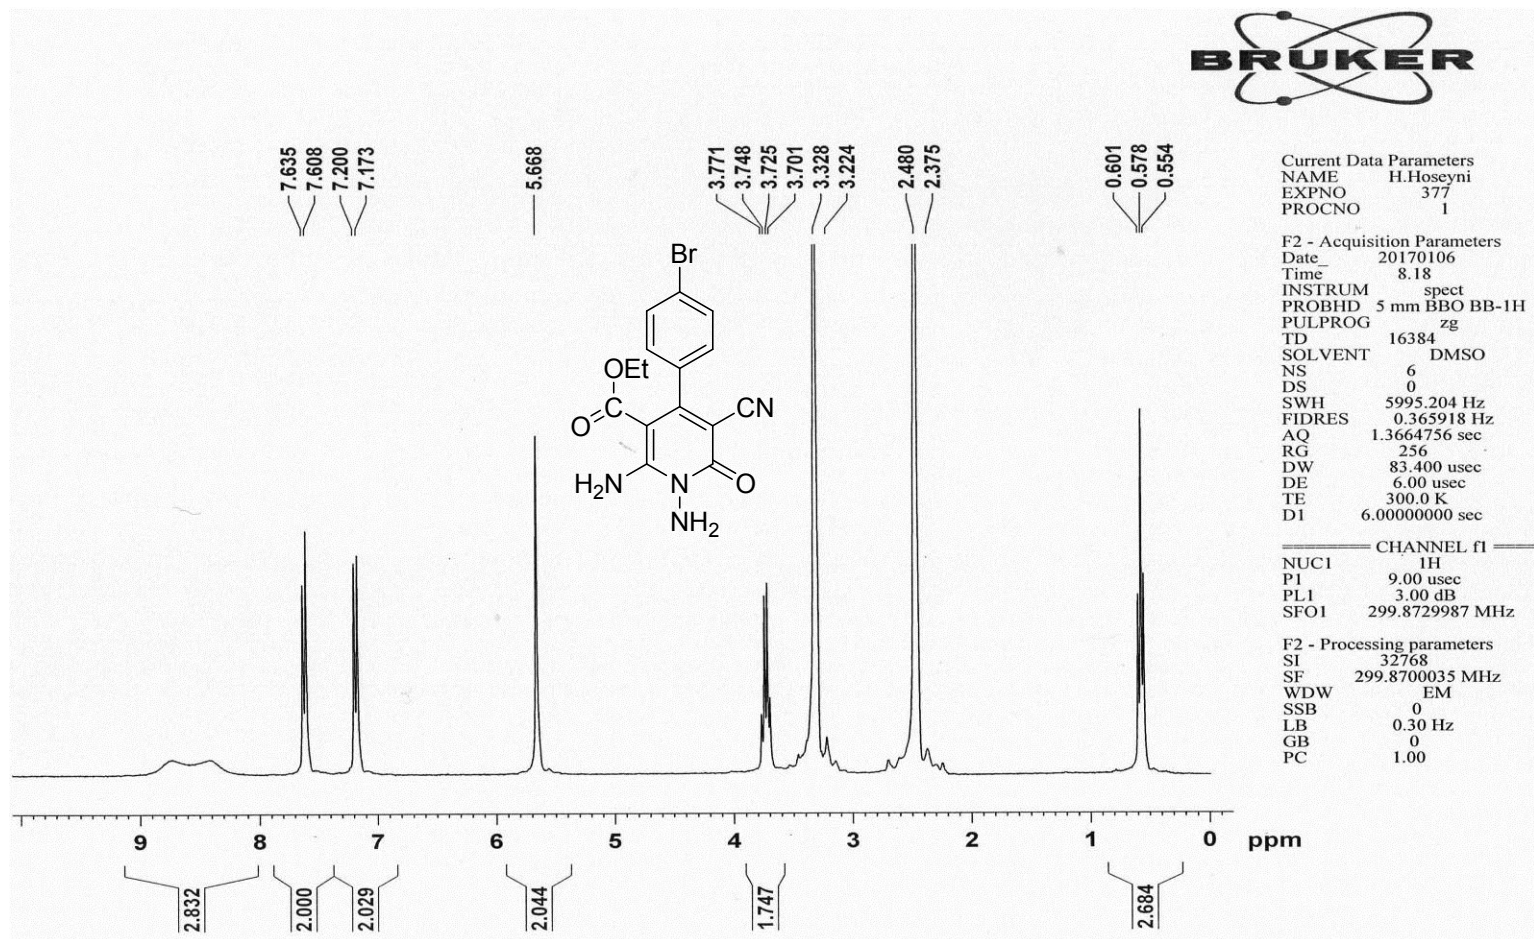<sup>1</sup>H NMR of 5b



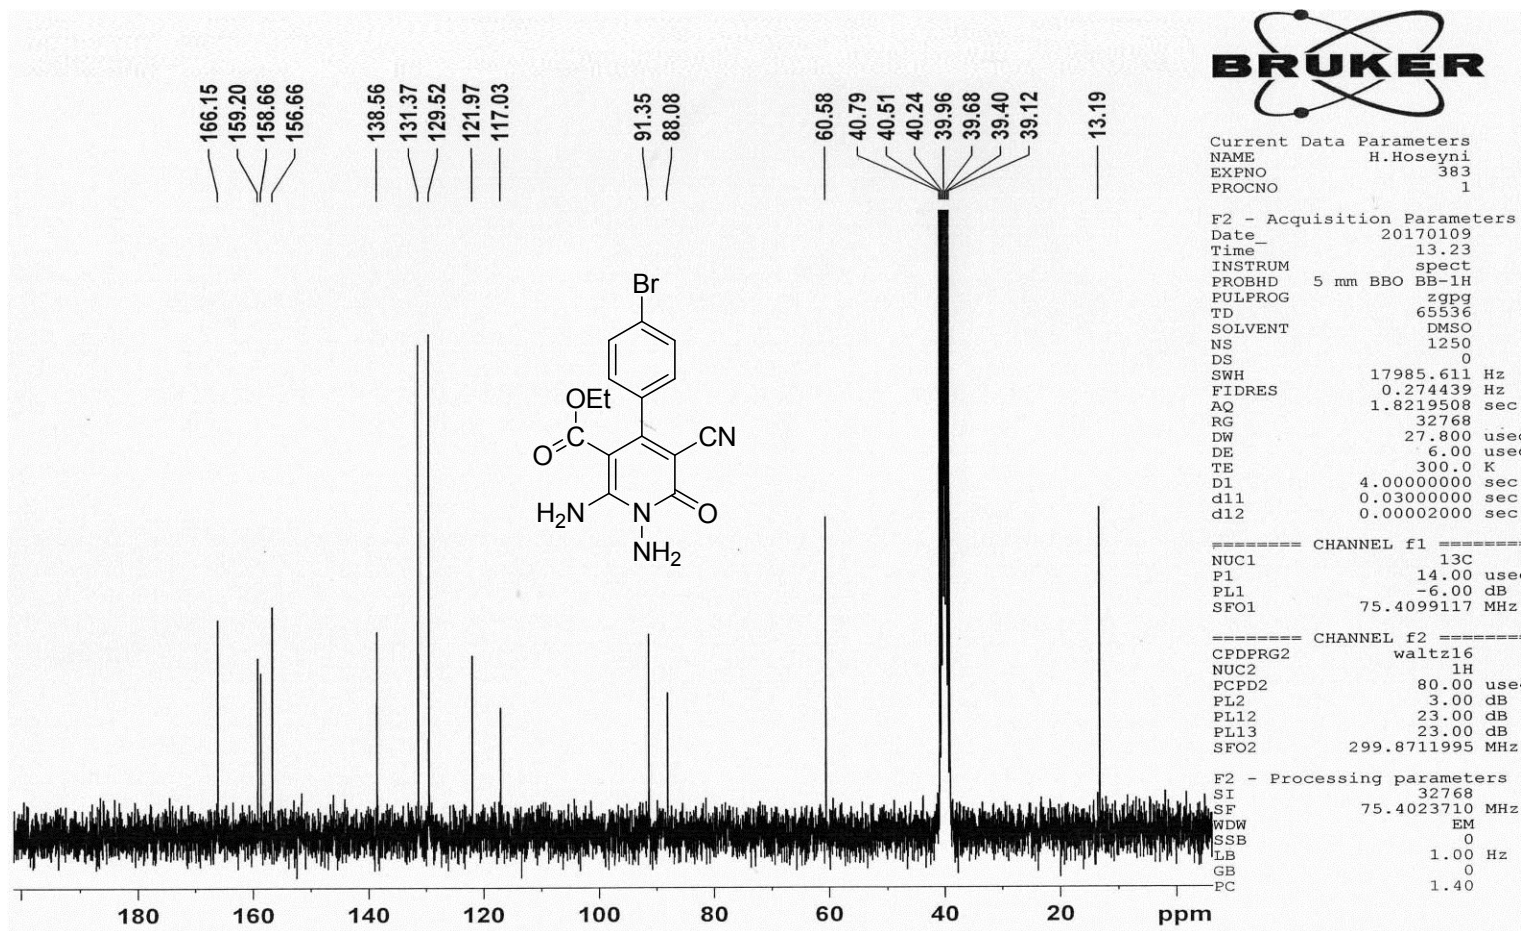<sup>13</sup>C NMR of 5b

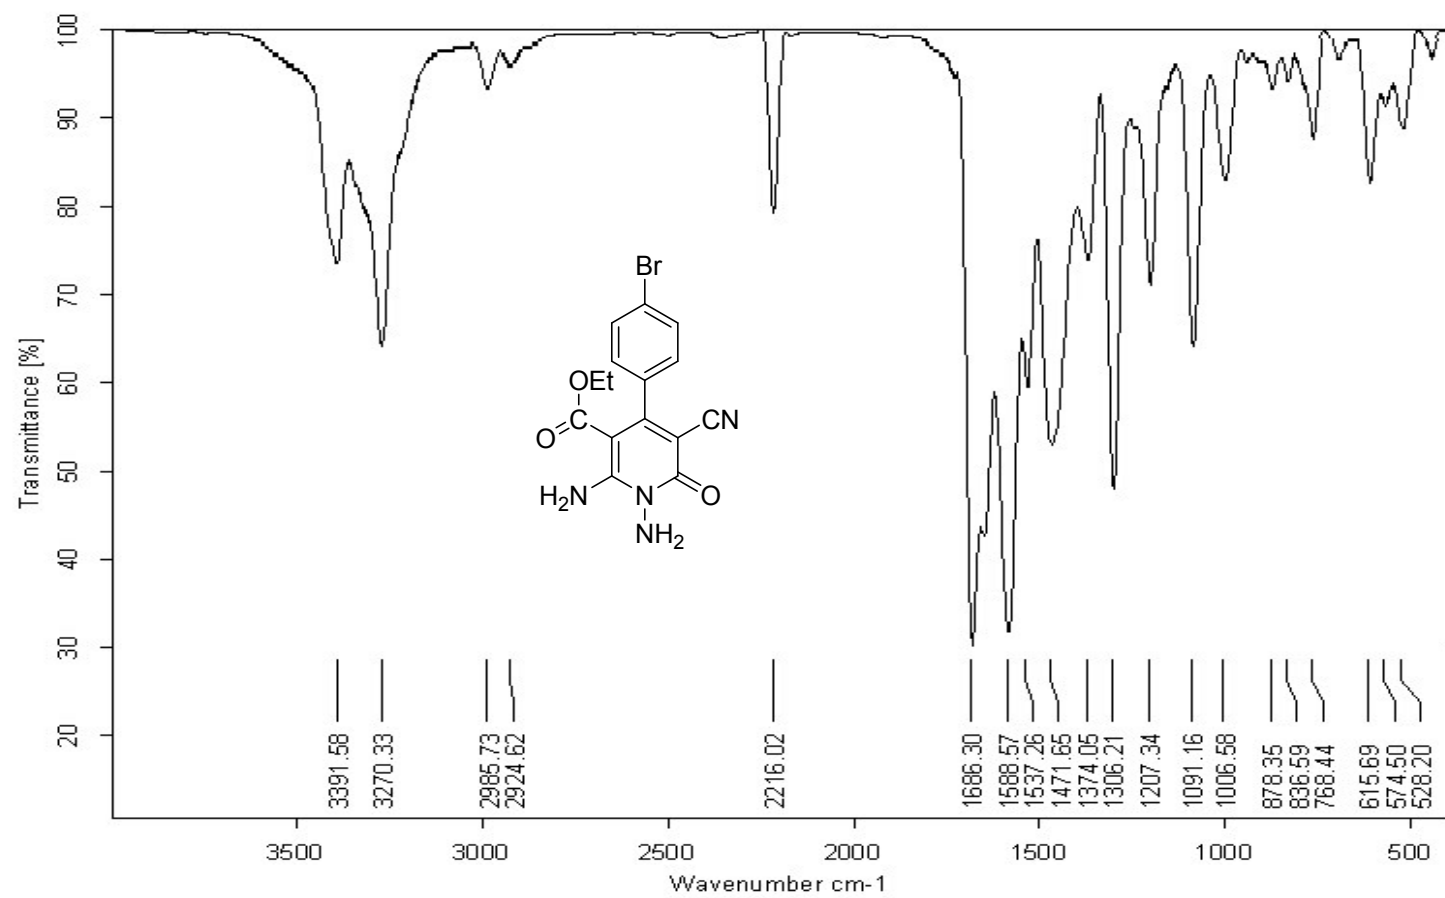**IR of 5b**

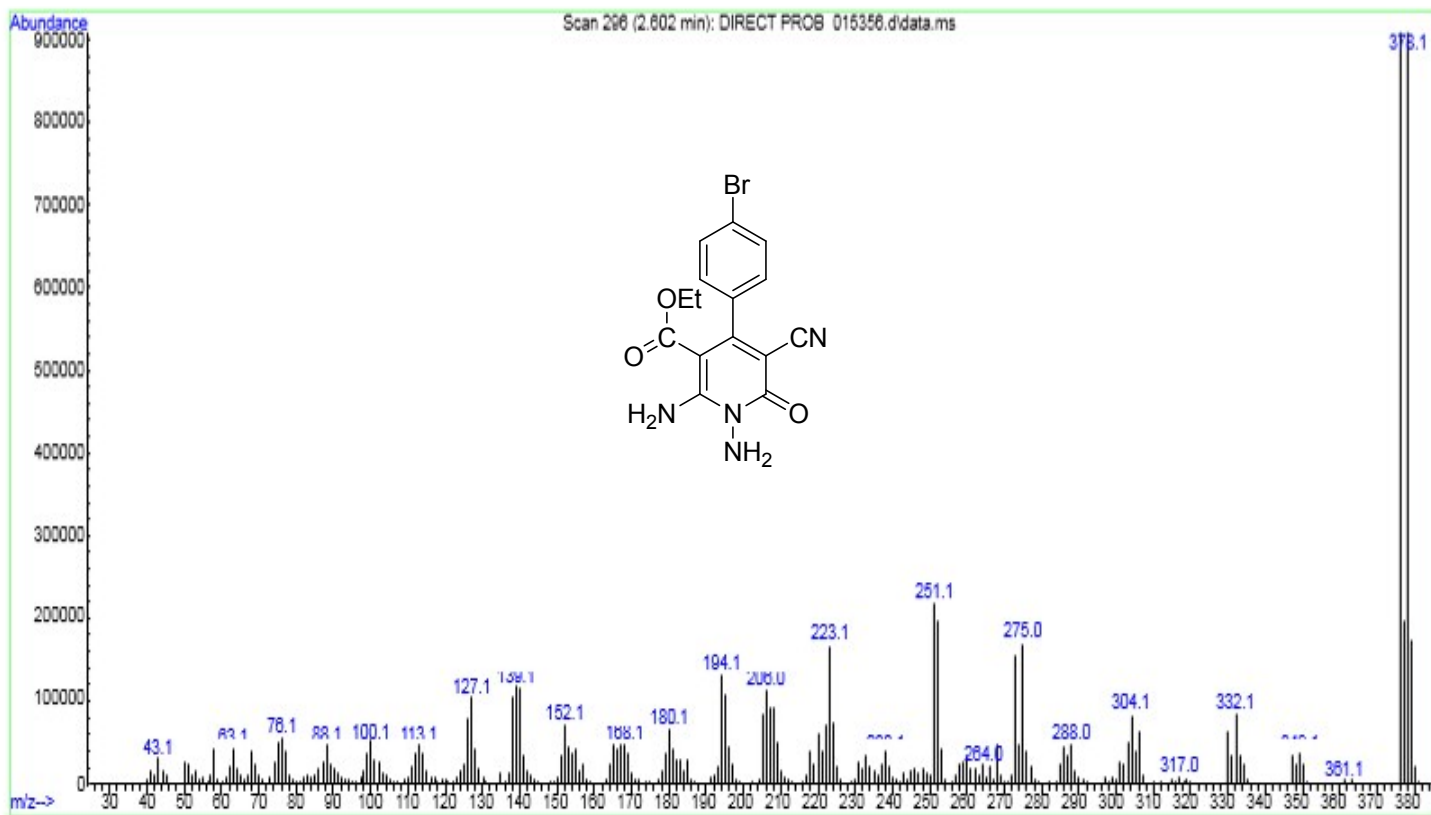

MS of 5b

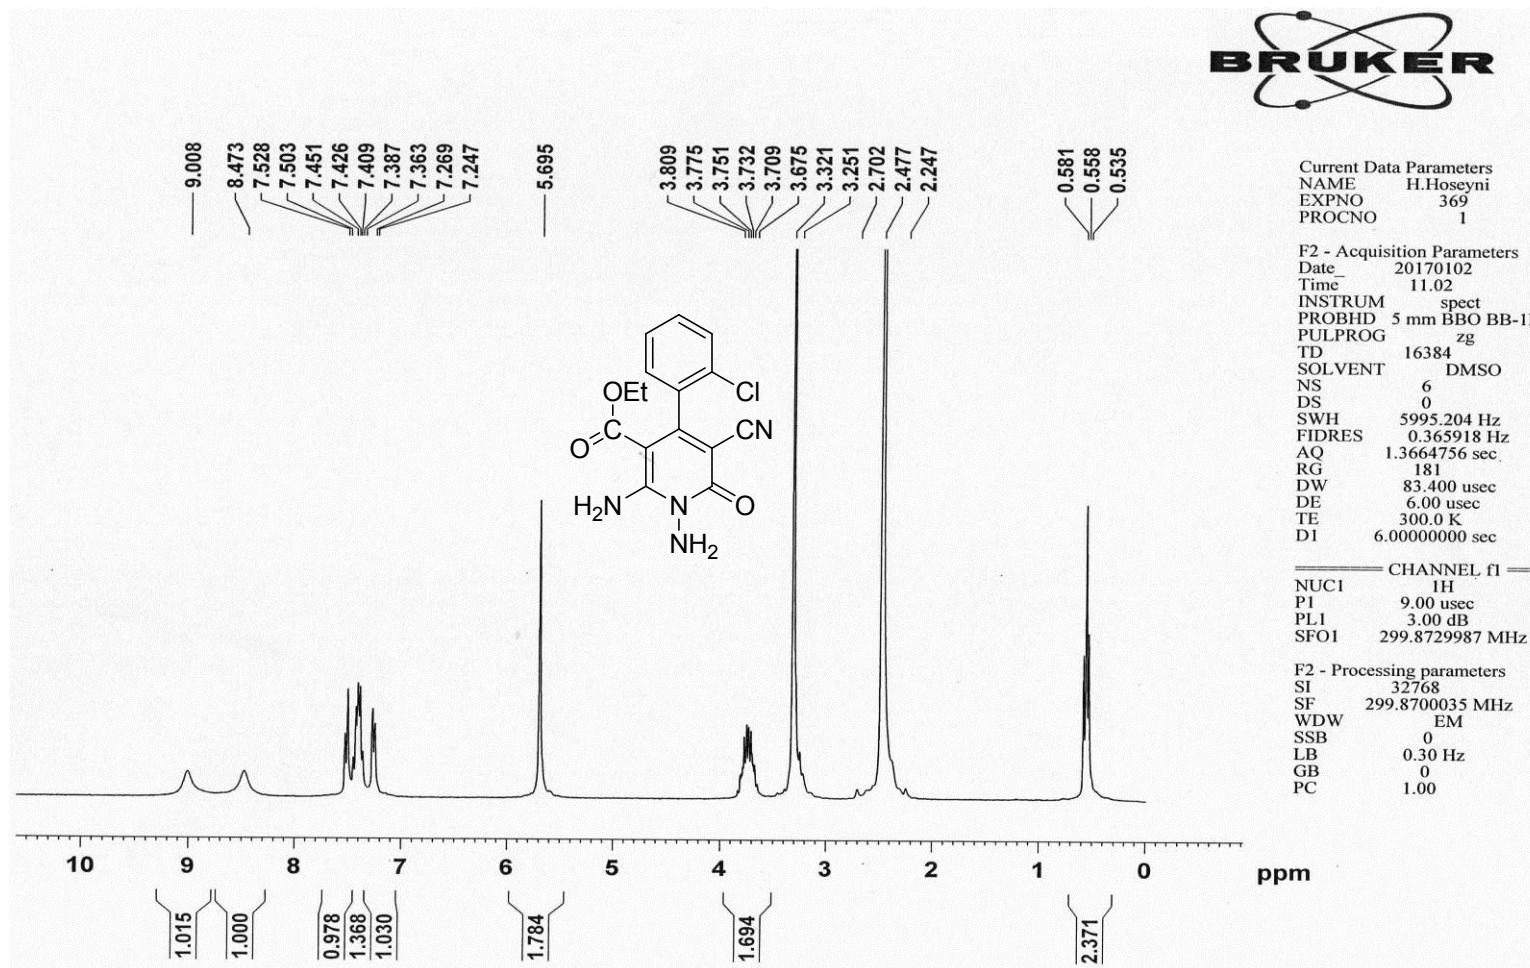 $^1\text{H}$  NMR of 5c

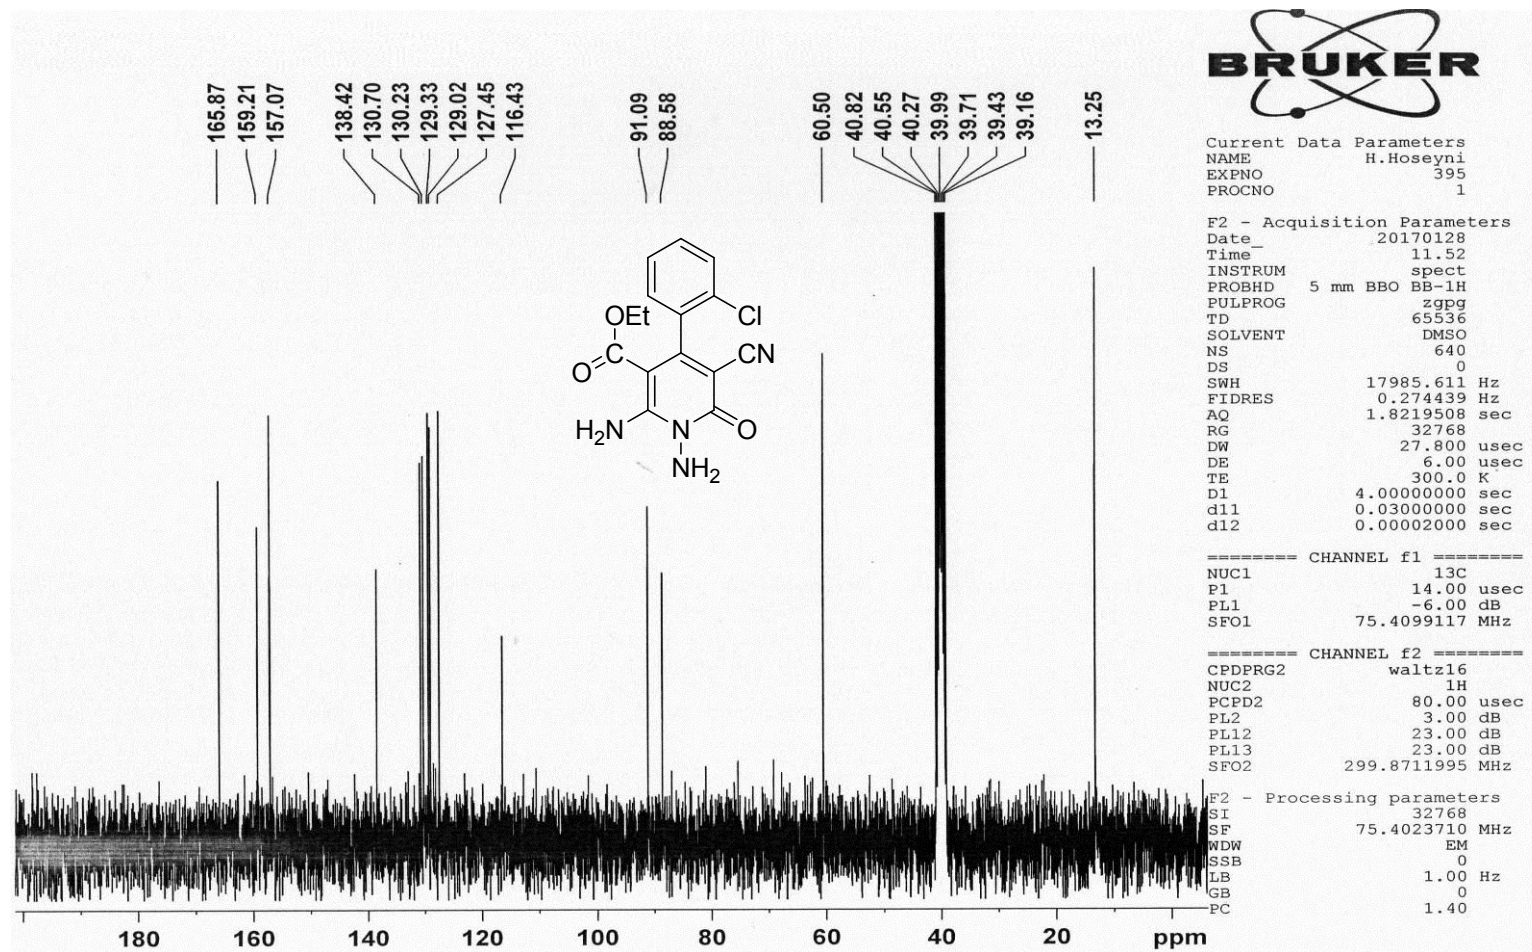 $^{13}\text{C}$  NMR of 5c

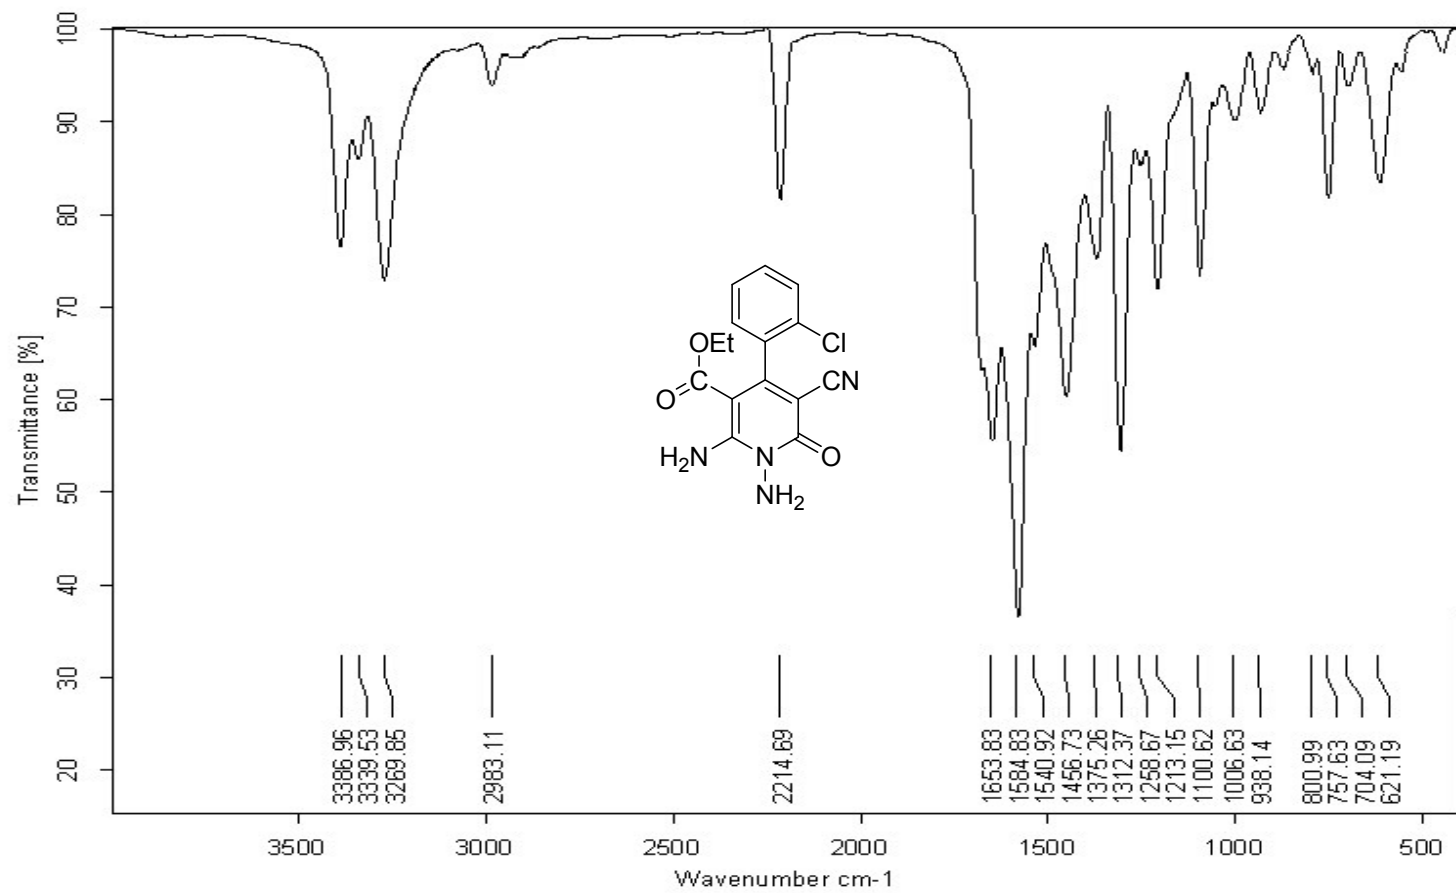

IR of 5c

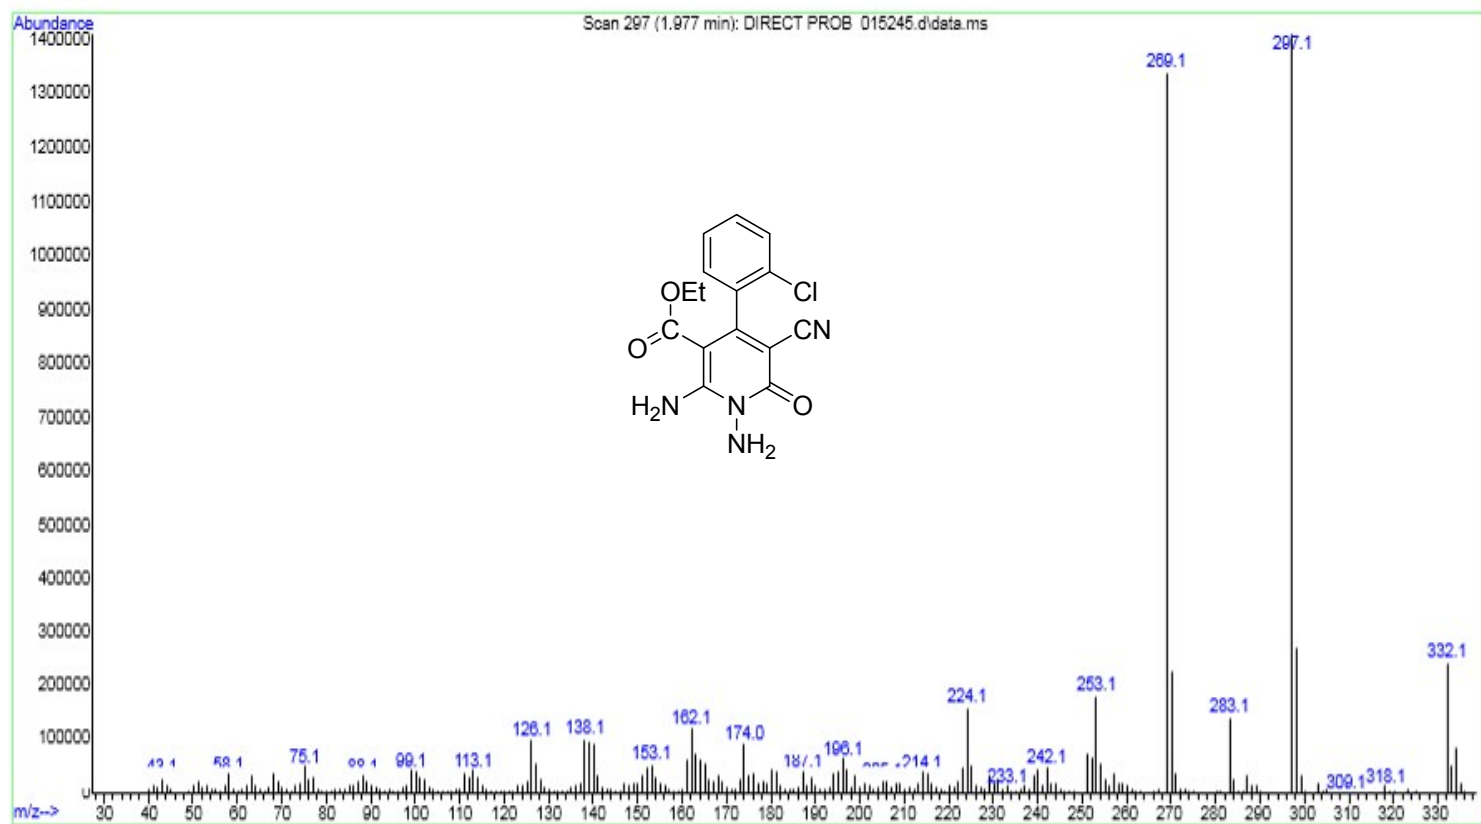

MS of 5c



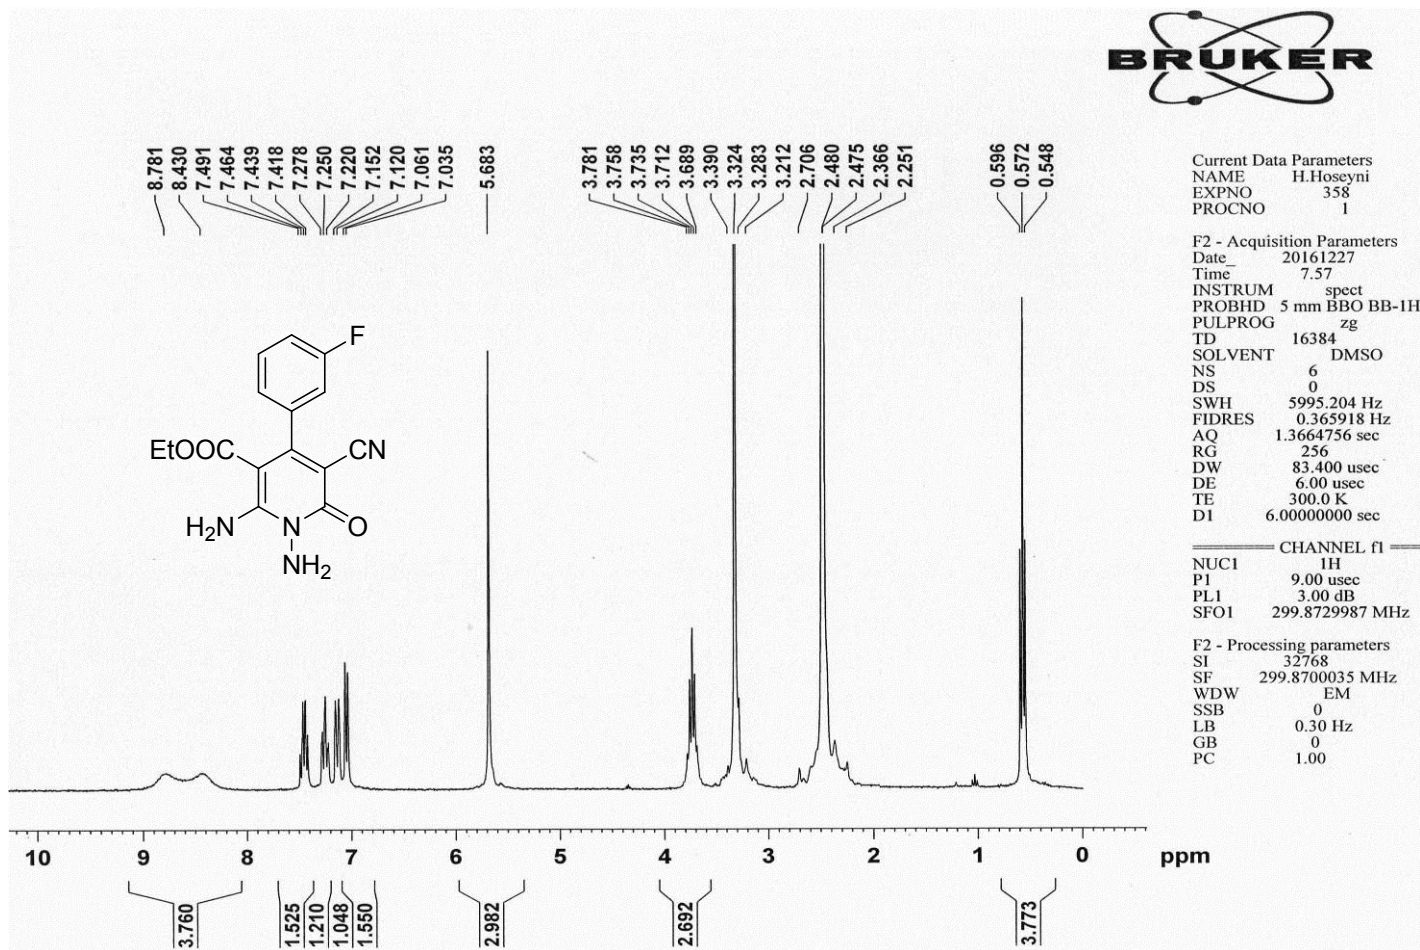**<sup>1</sup>H NMR of 5d**

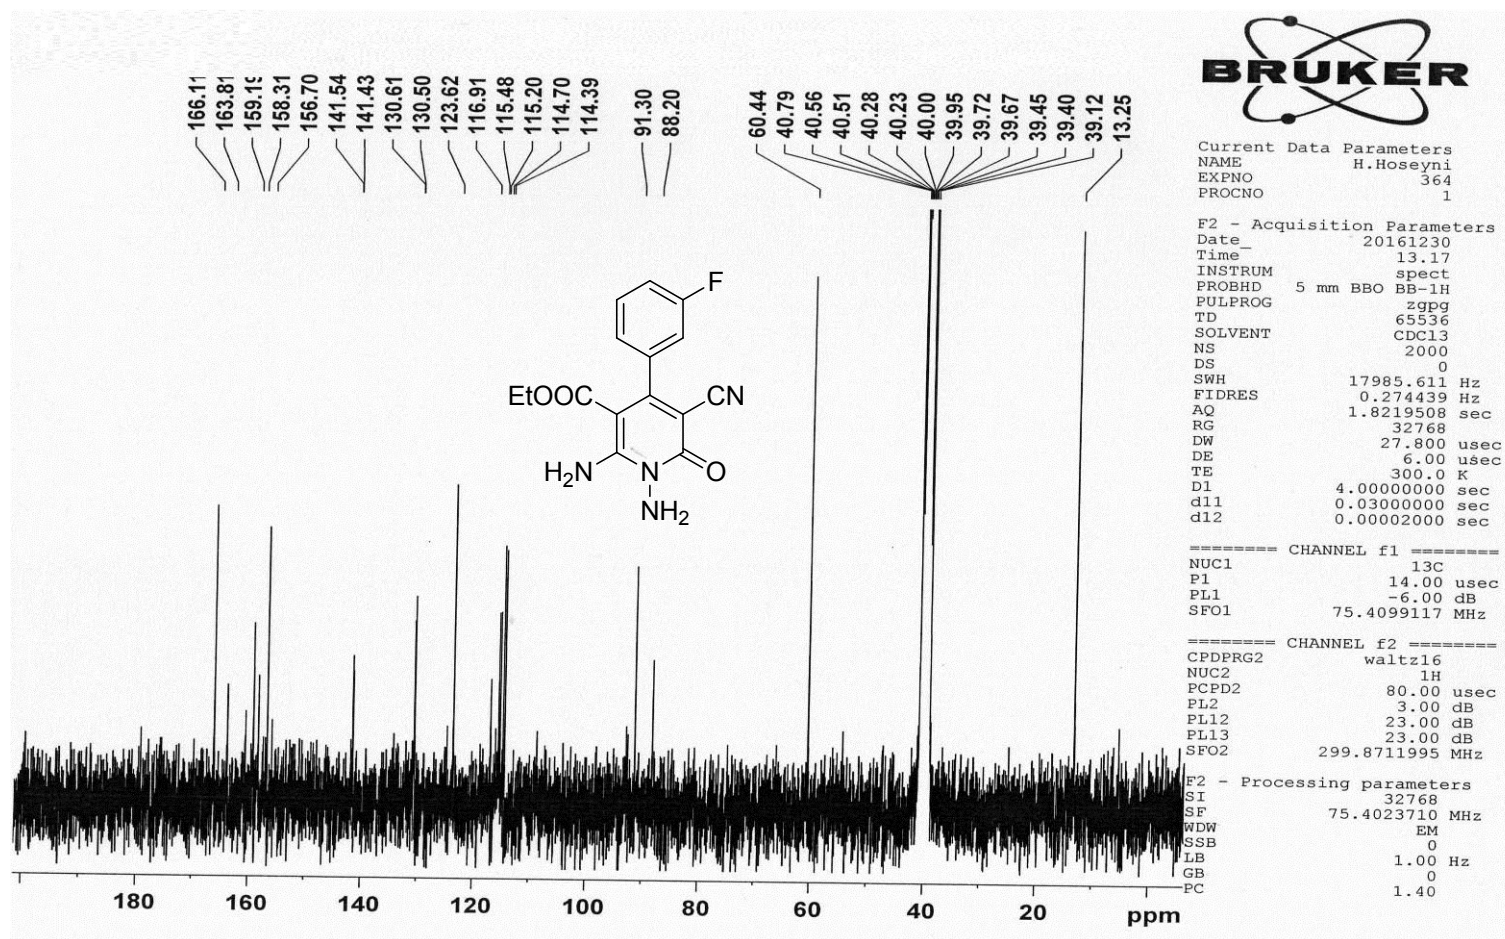<sup>13</sup>C NMR of 5d

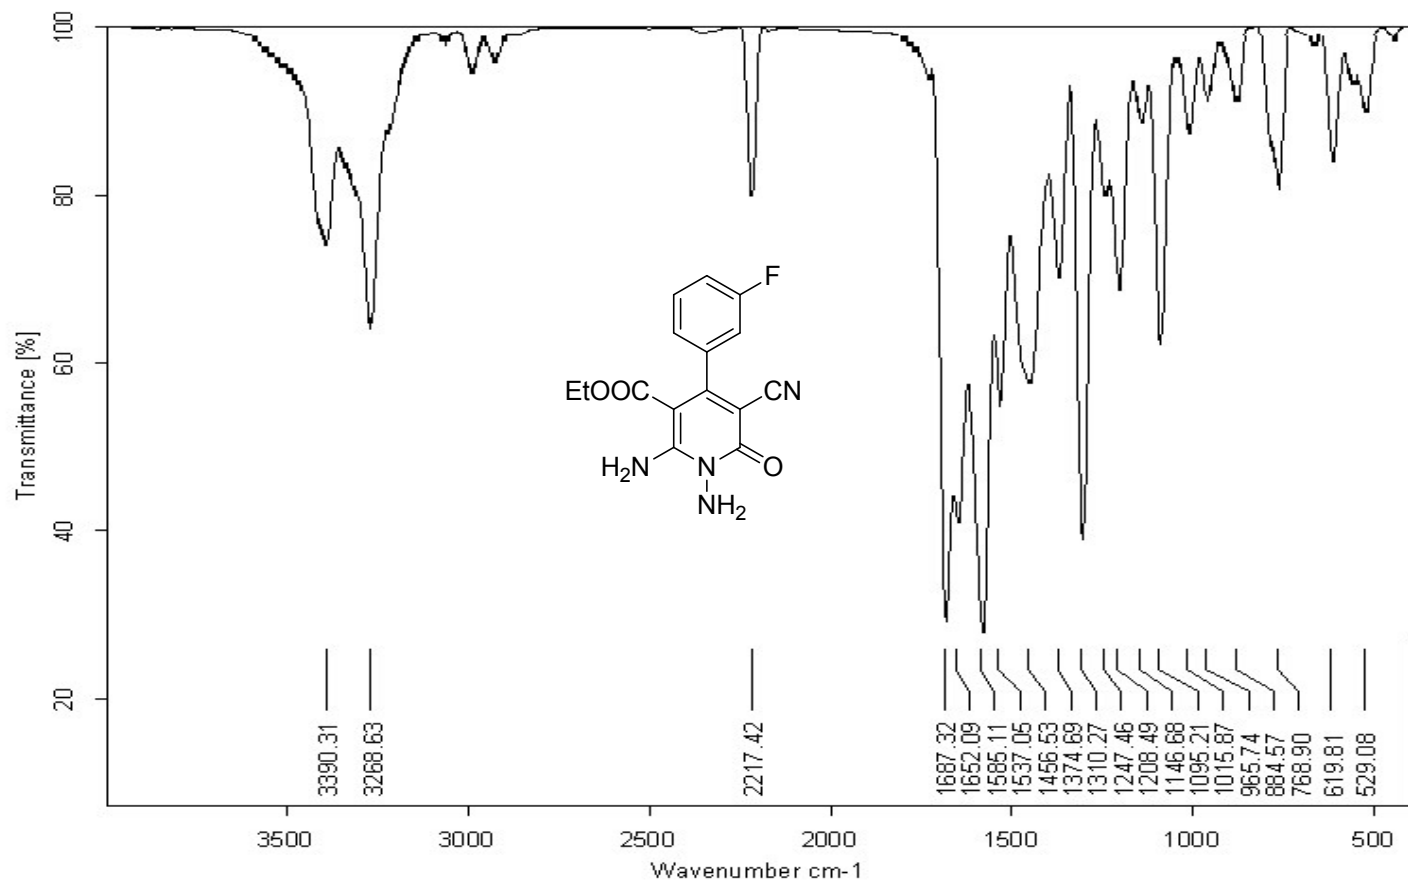

IR of 5d

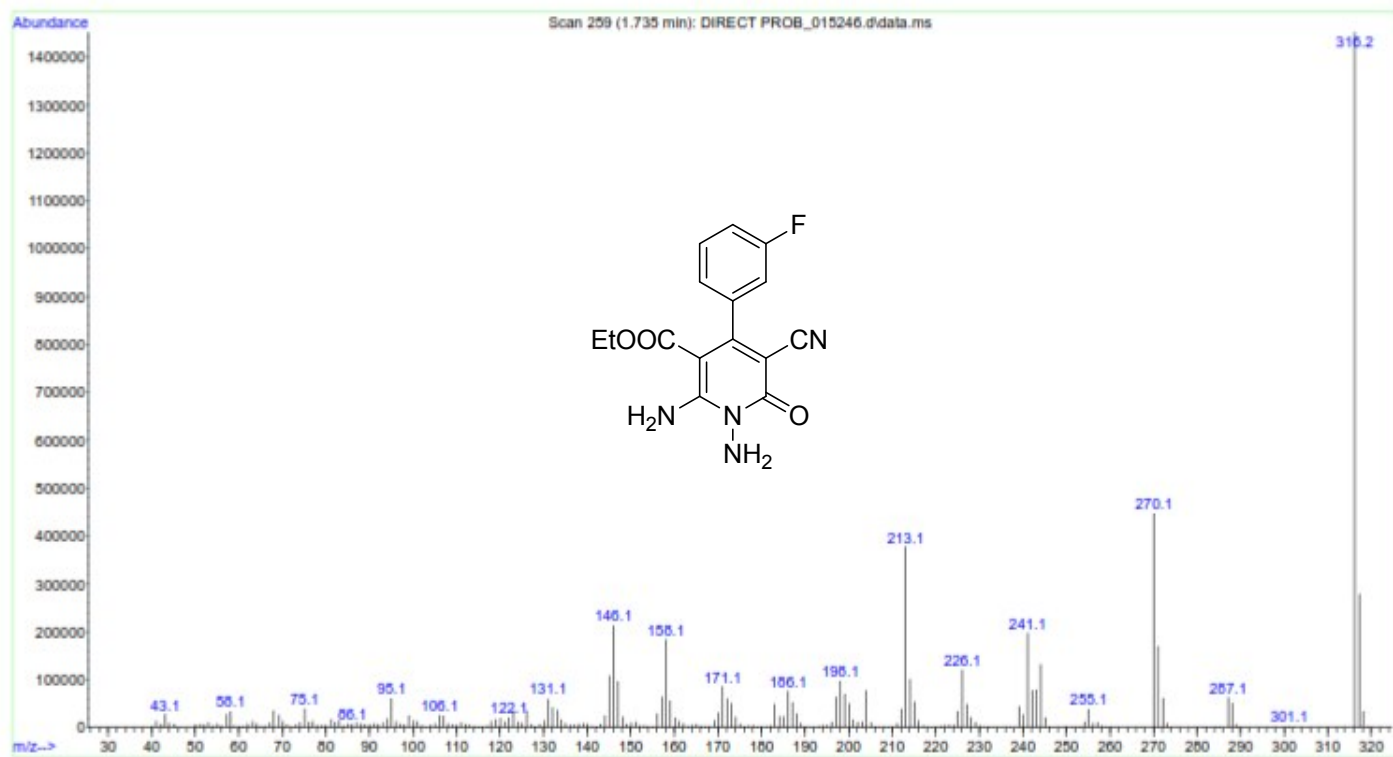

MS of 5d

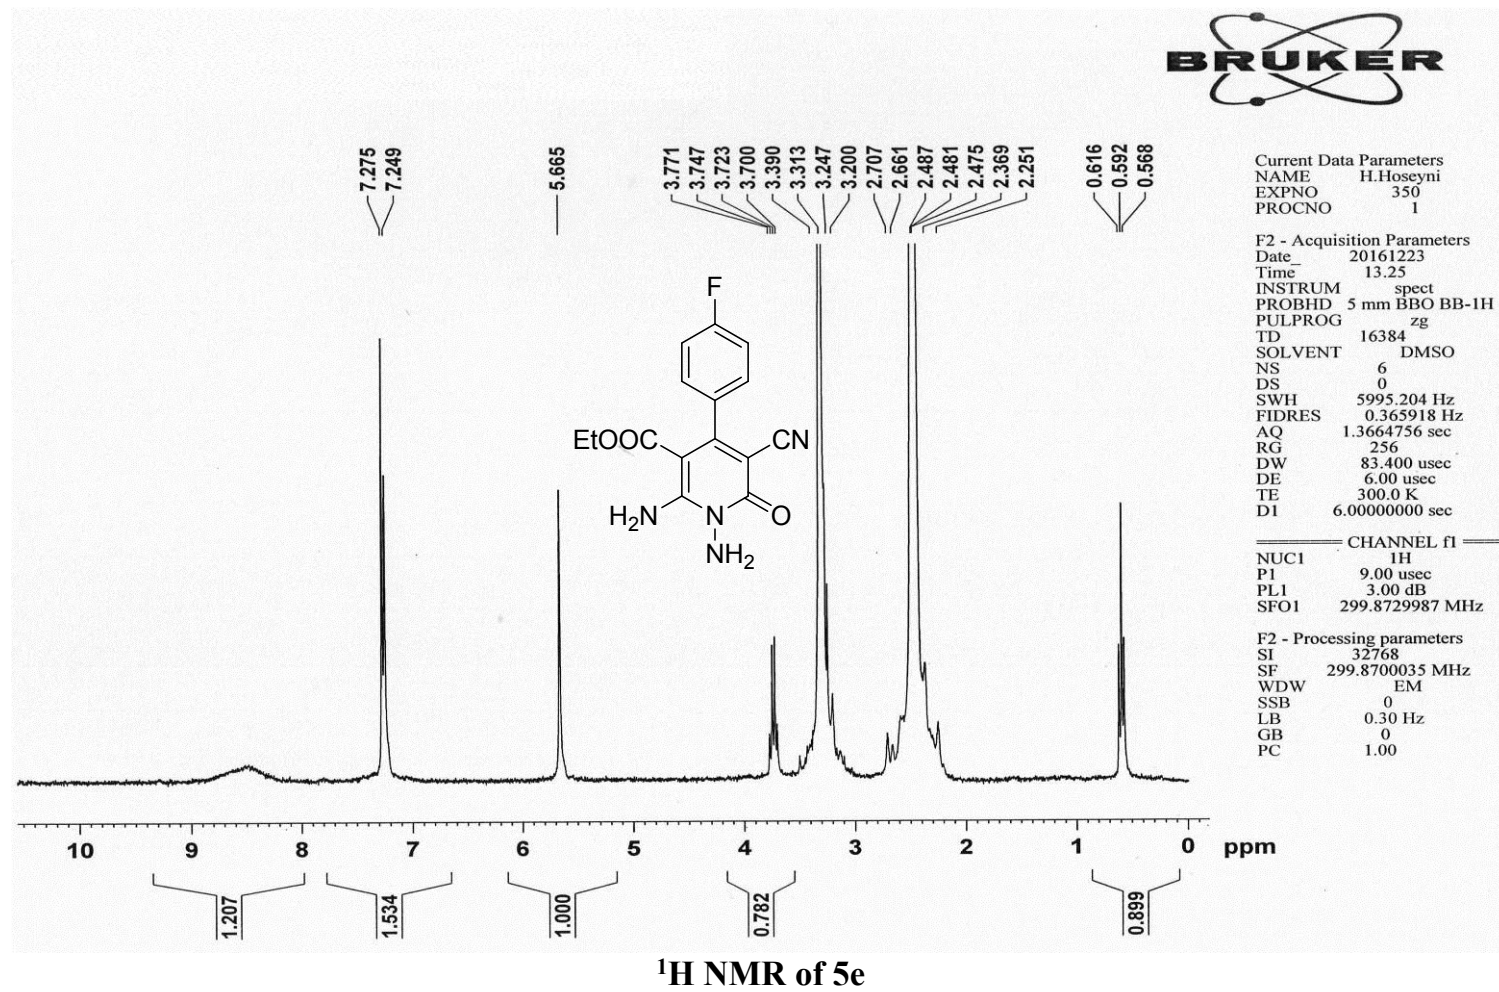

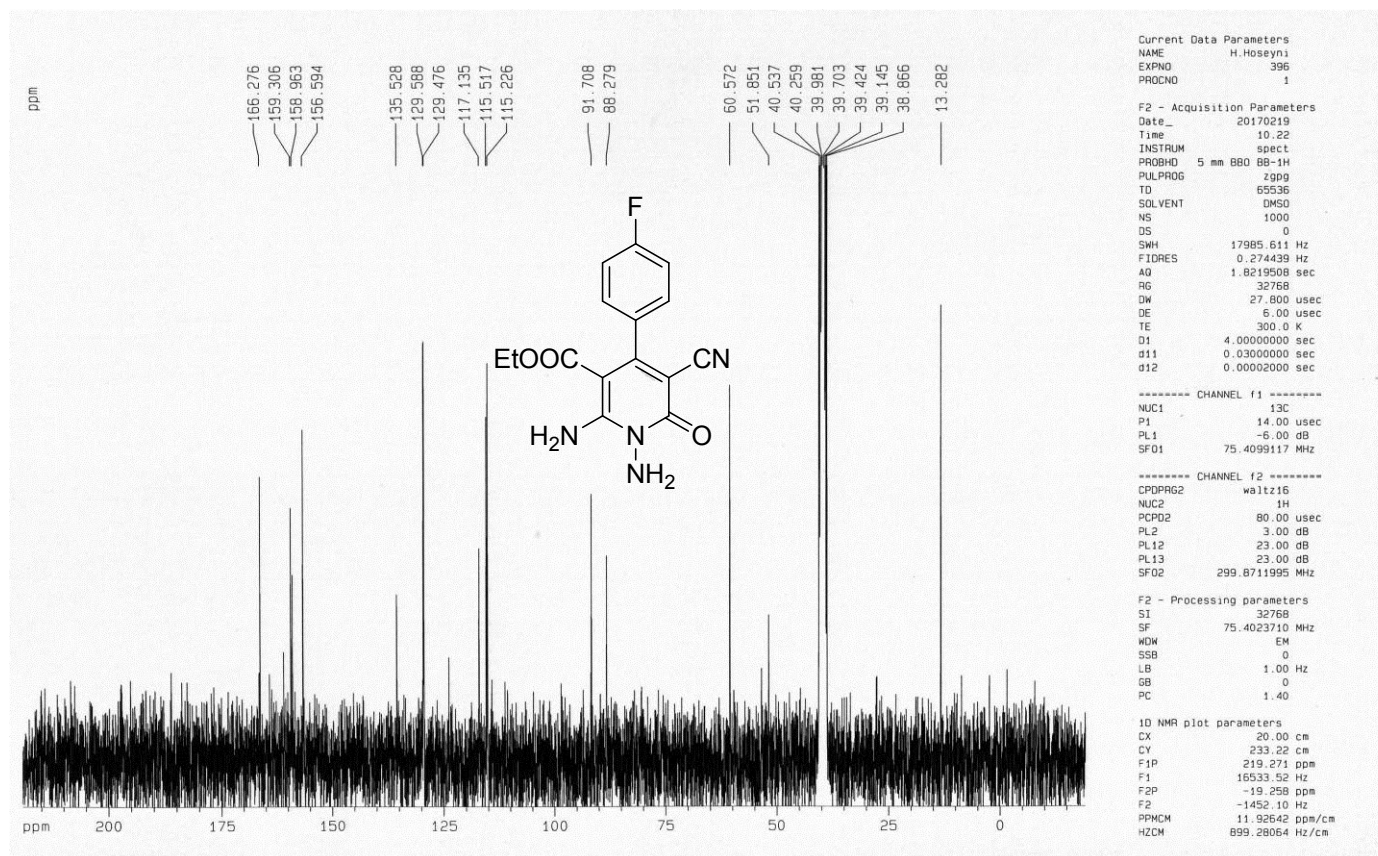<sup>13</sup>C NMR of 5e



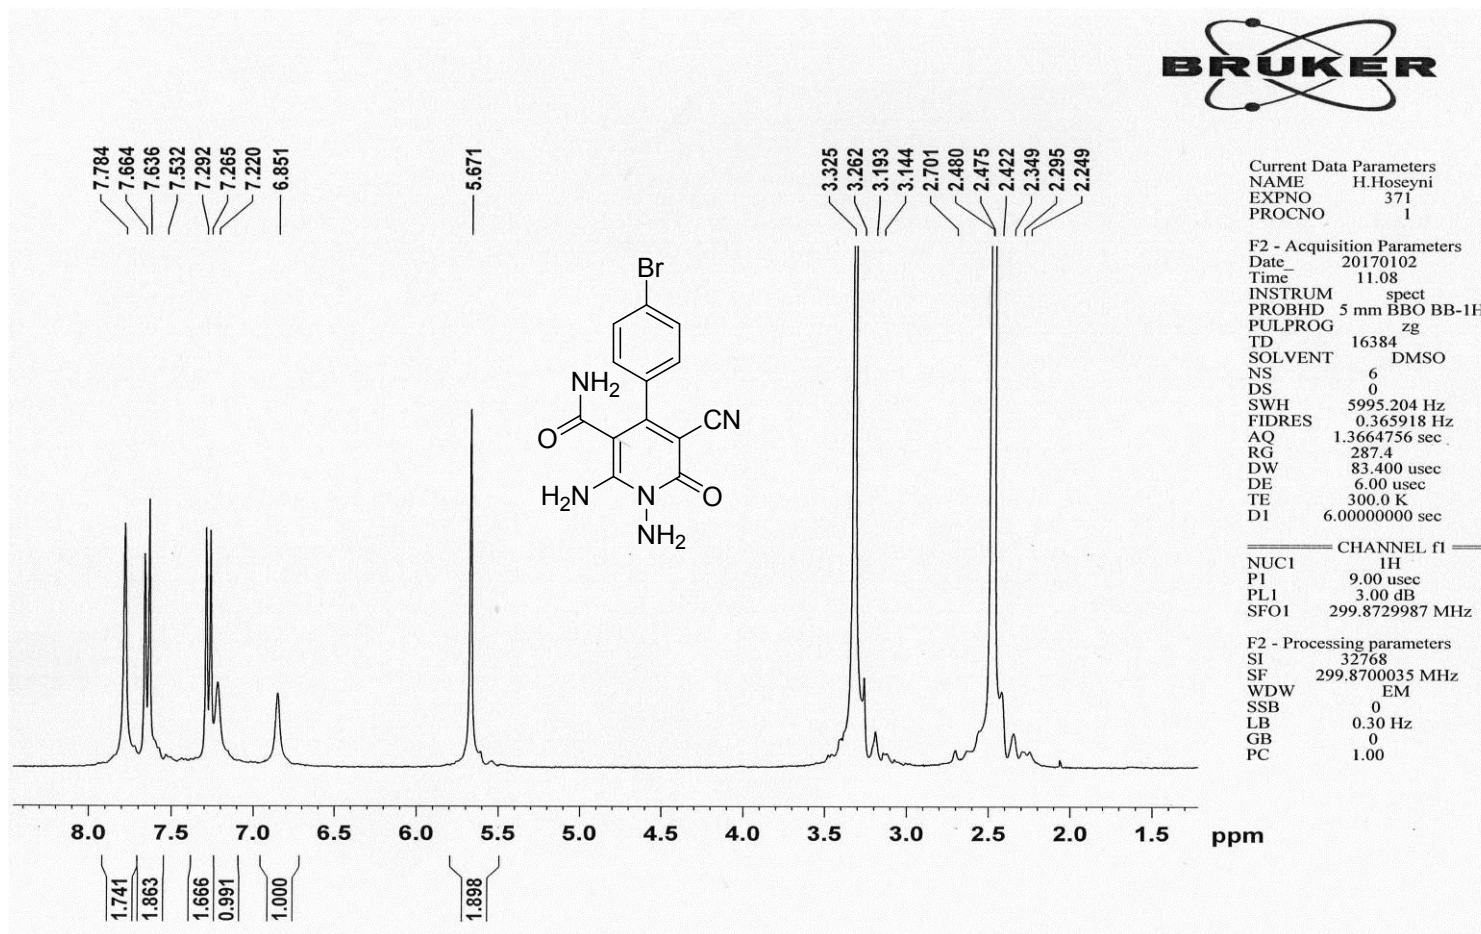<sup>1</sup>H NMR of 6a



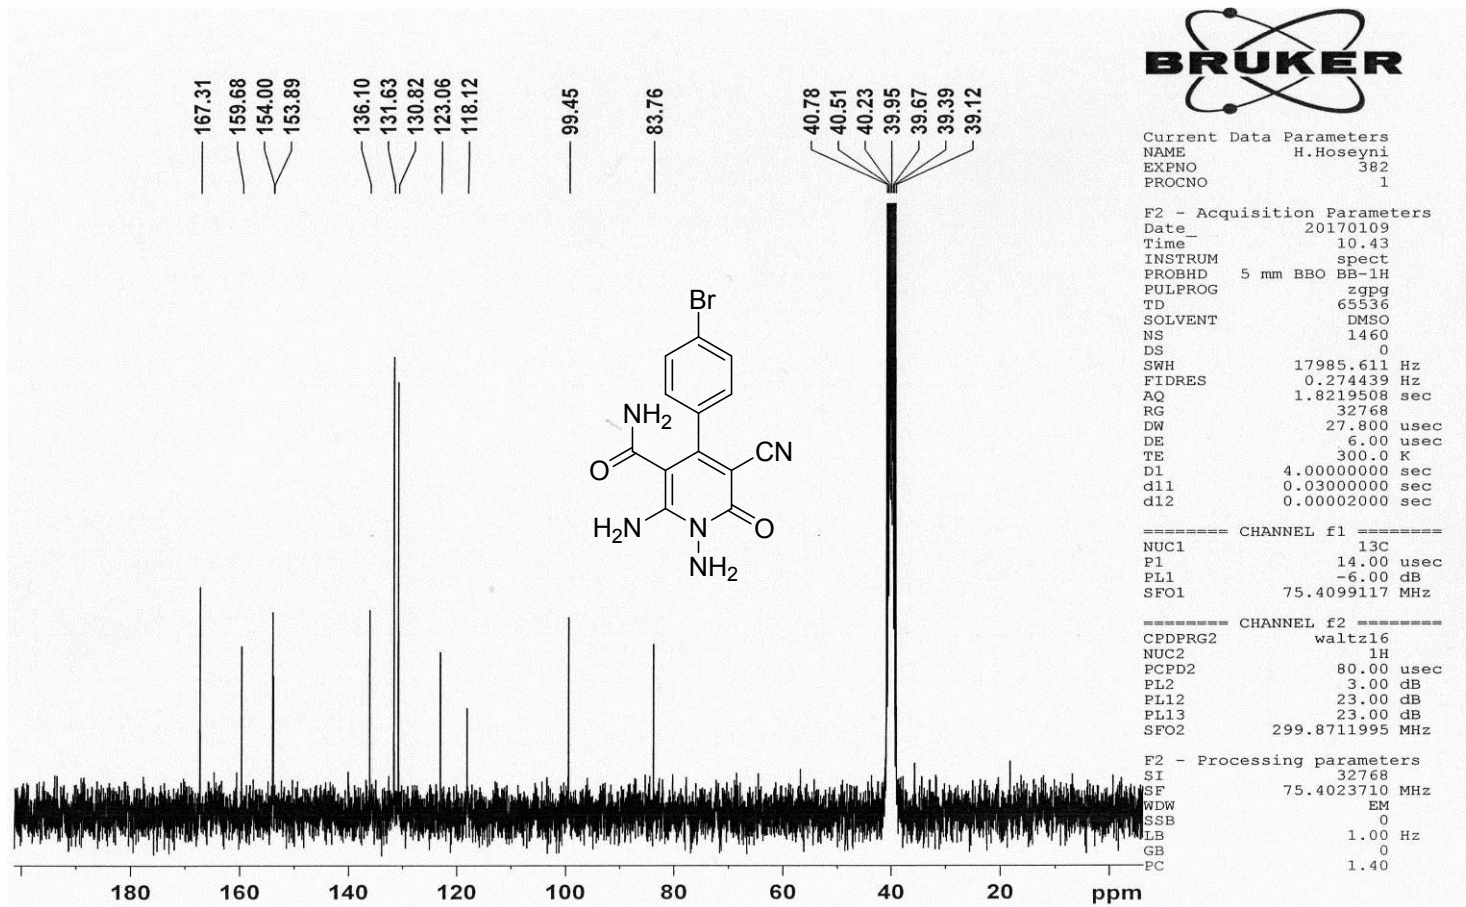

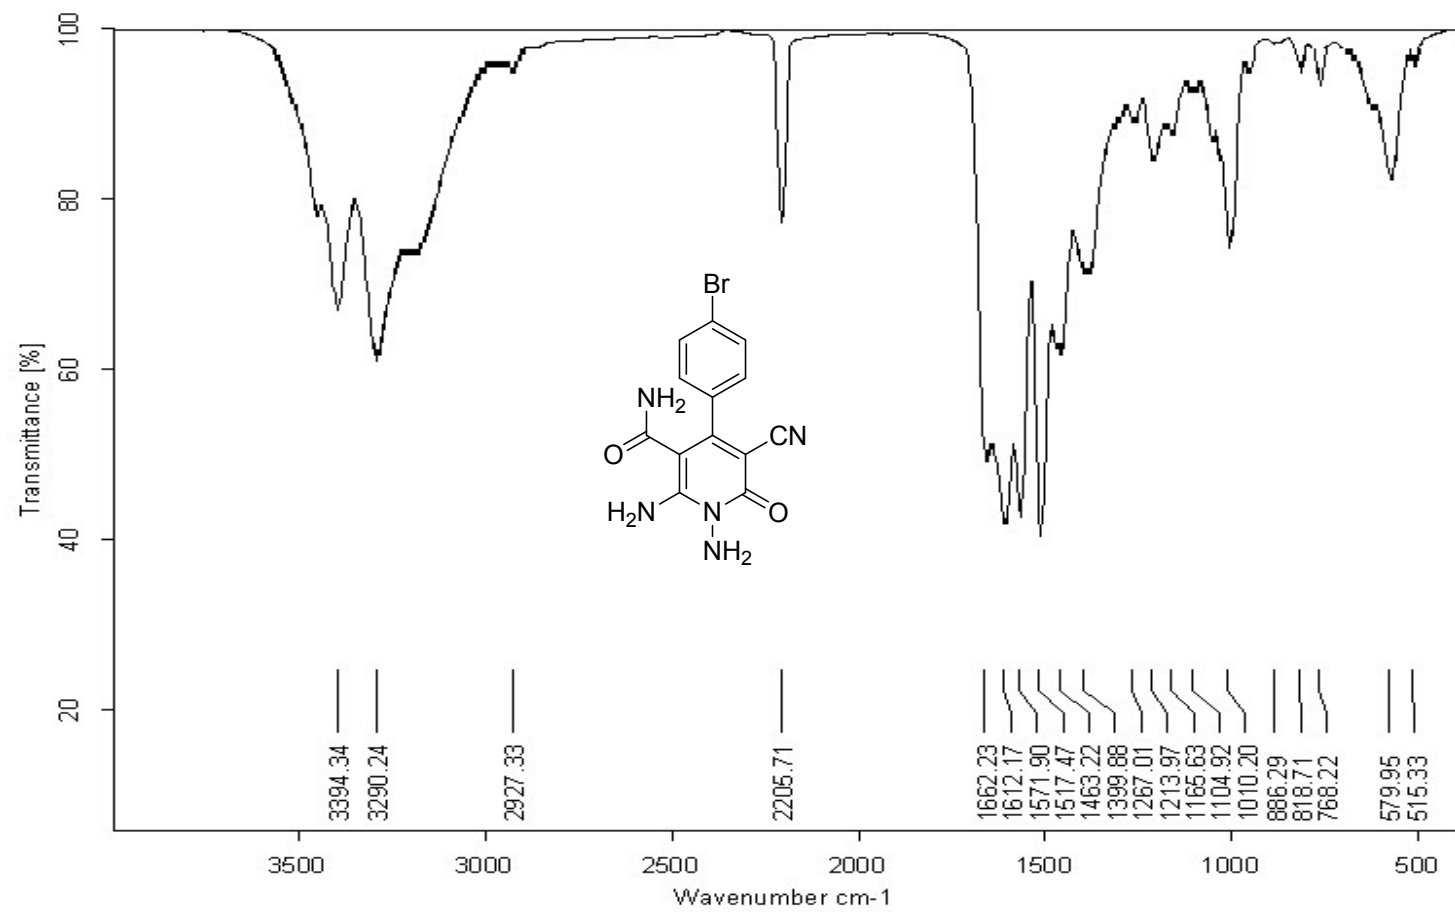

IR of 6a

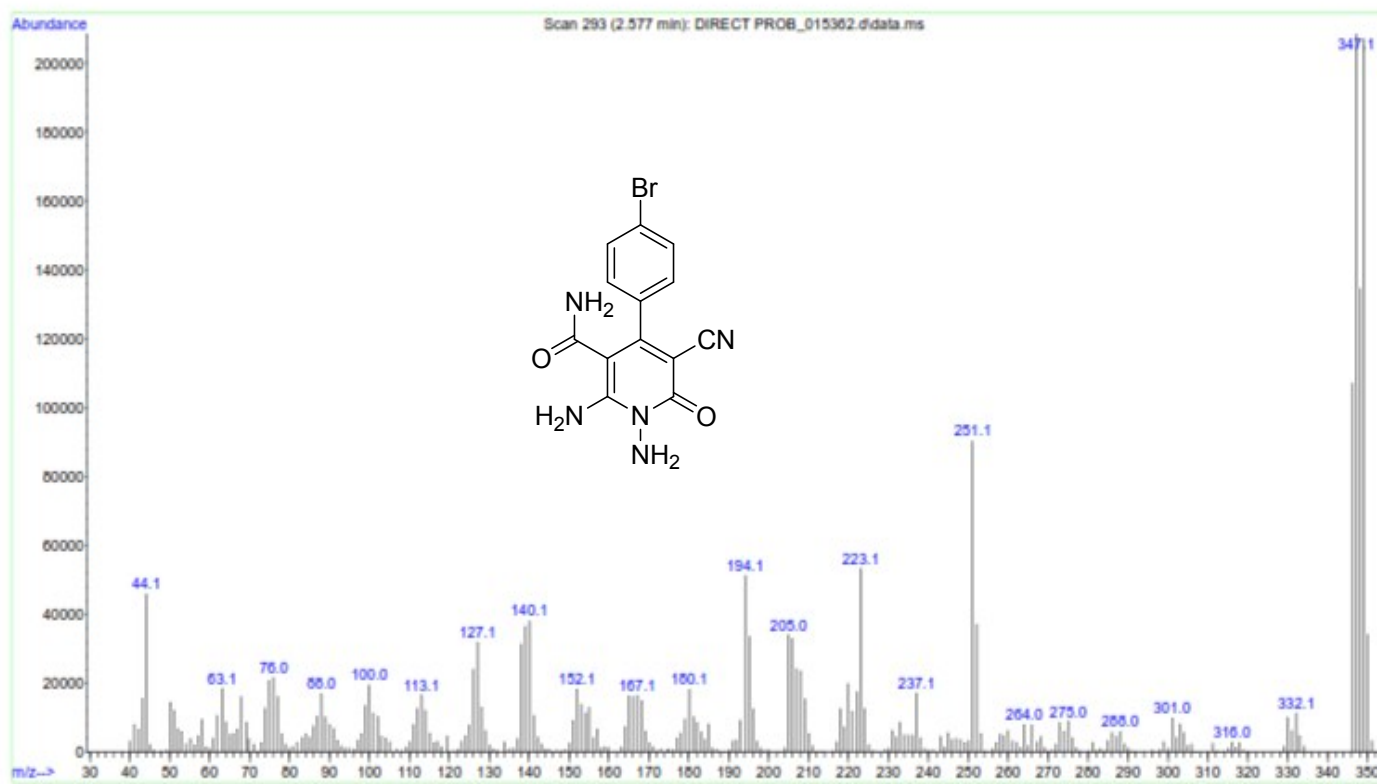

MS of 6a

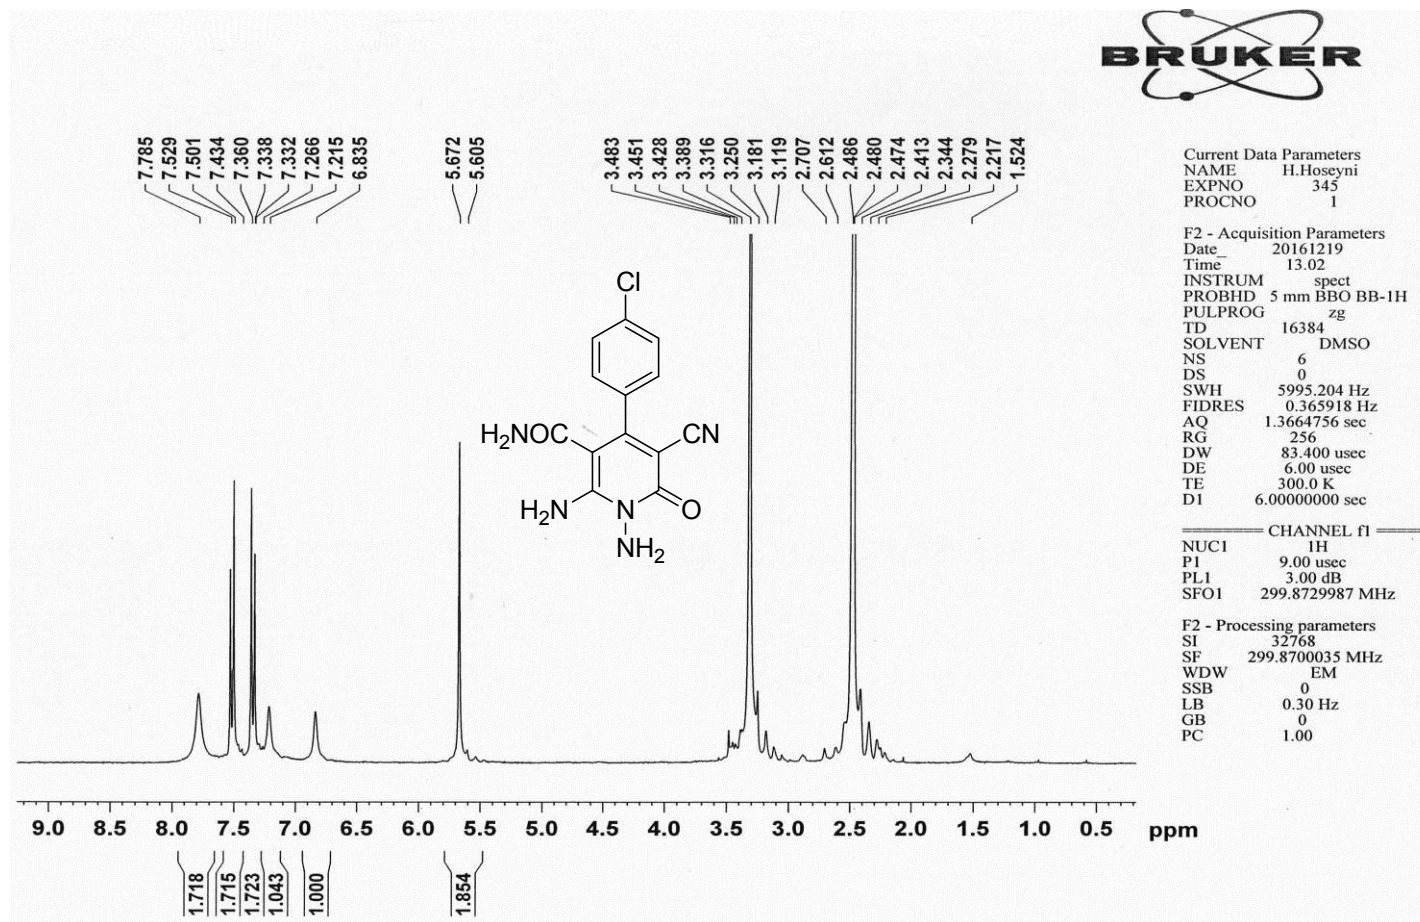

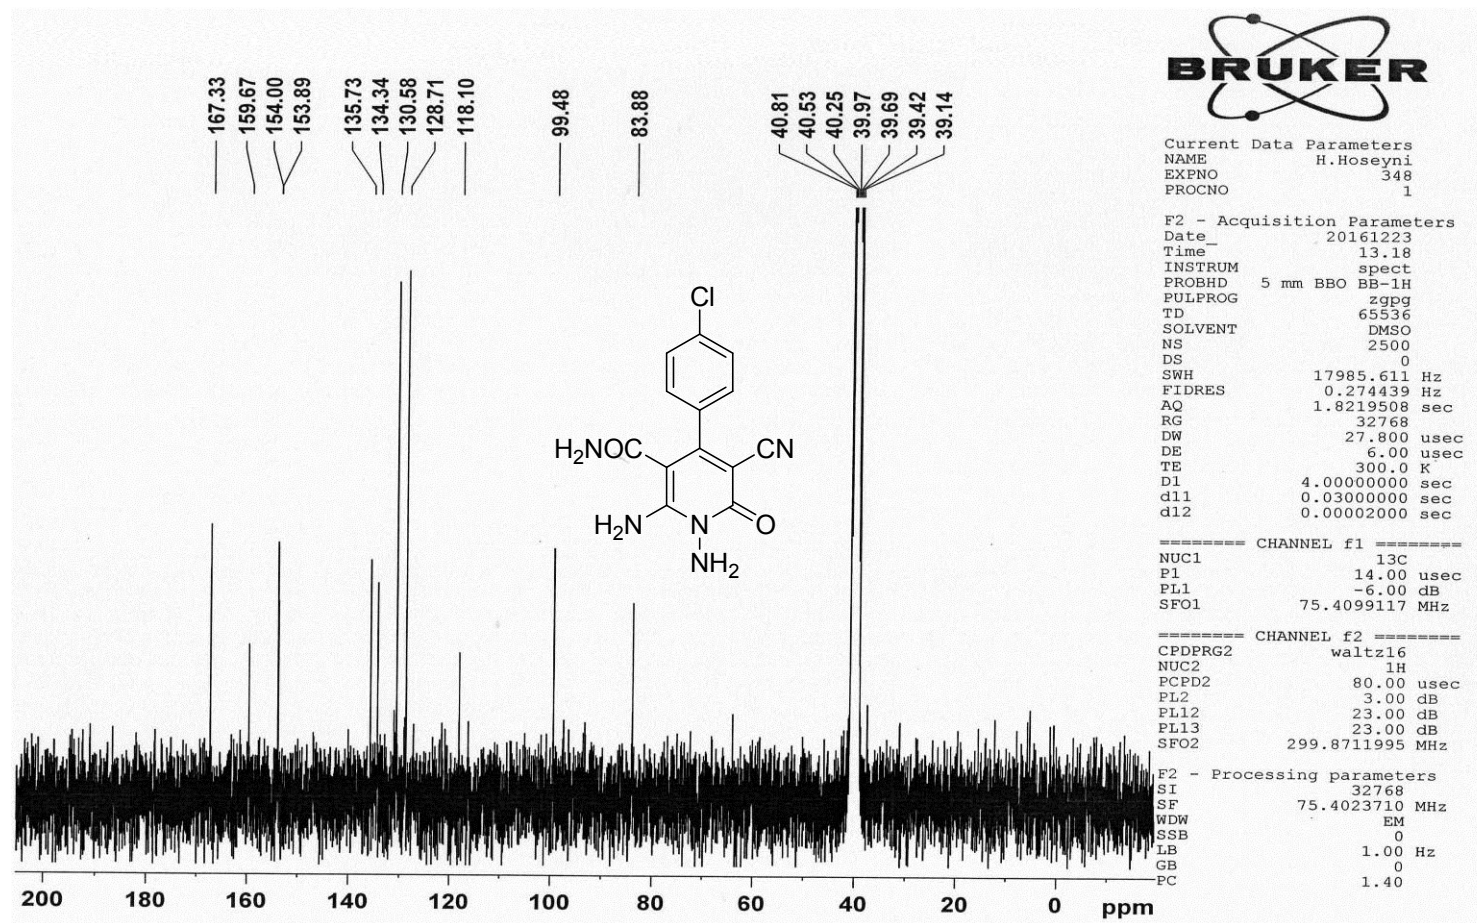 $^{13}\text{C}$  NMR of 6b

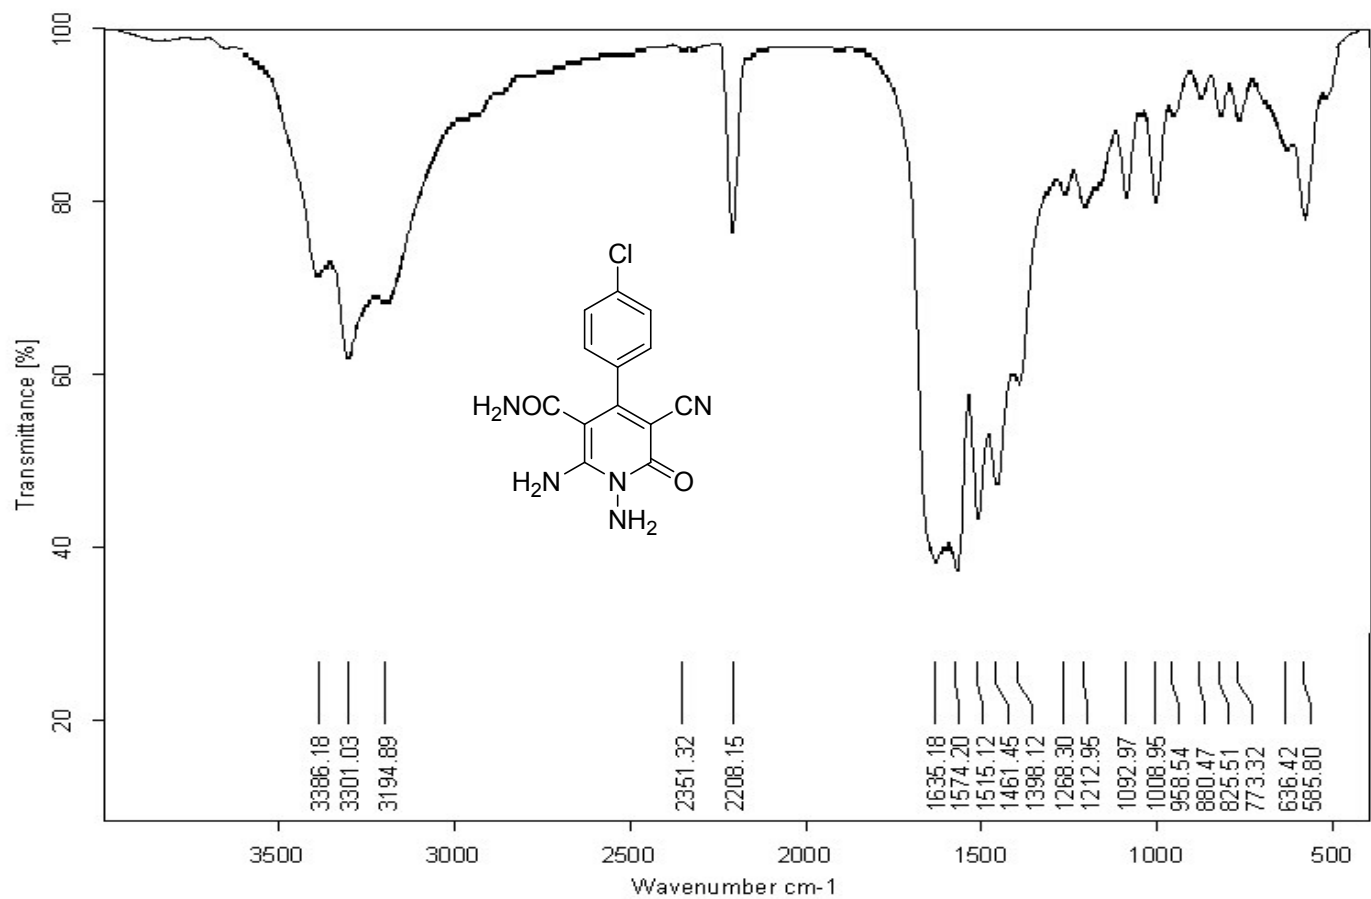**IR of 6b**

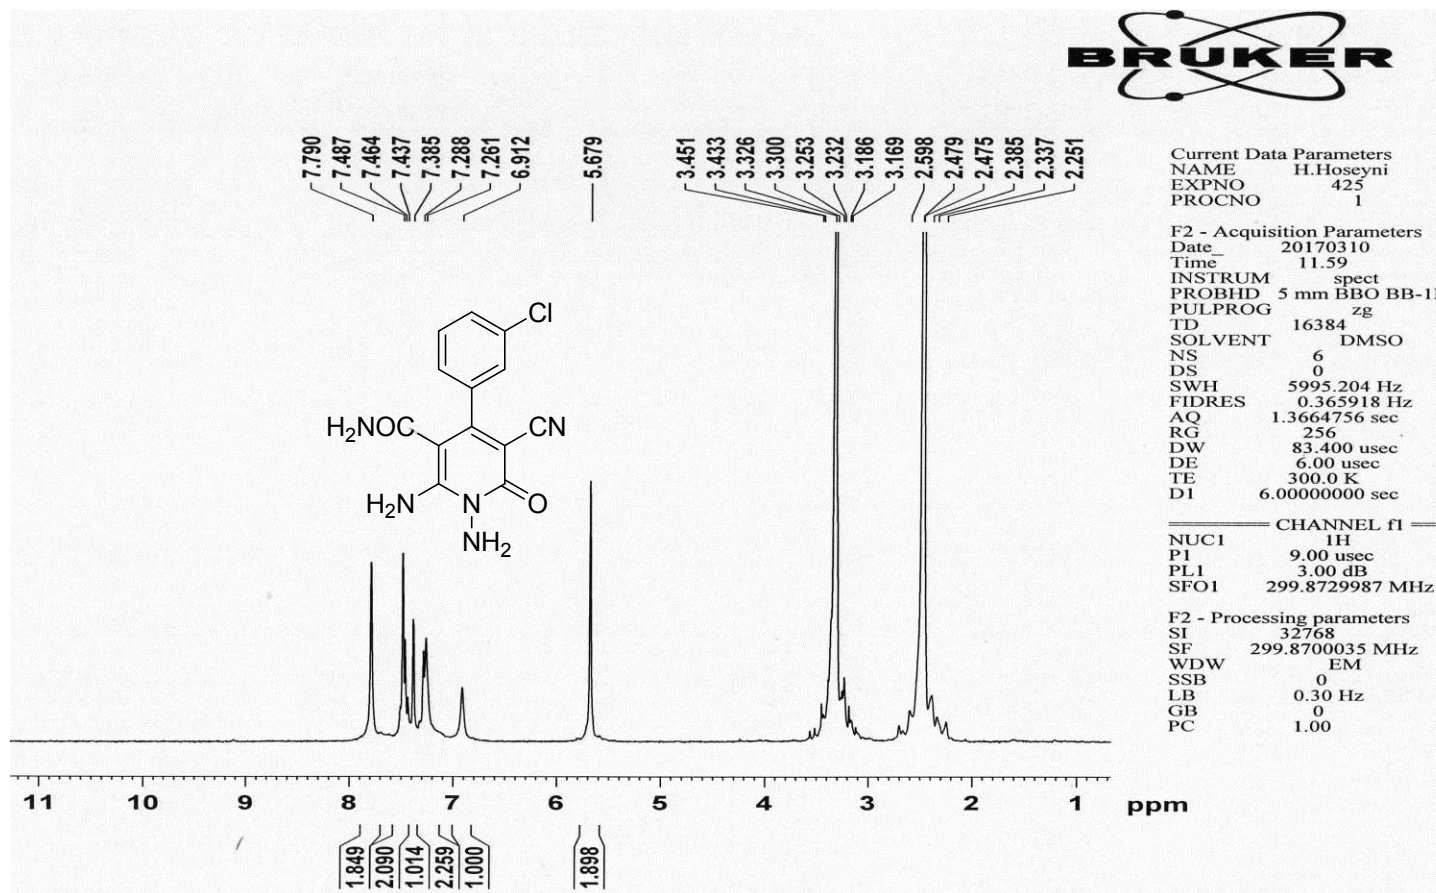 $^1\text{H}$  NMR of 6c



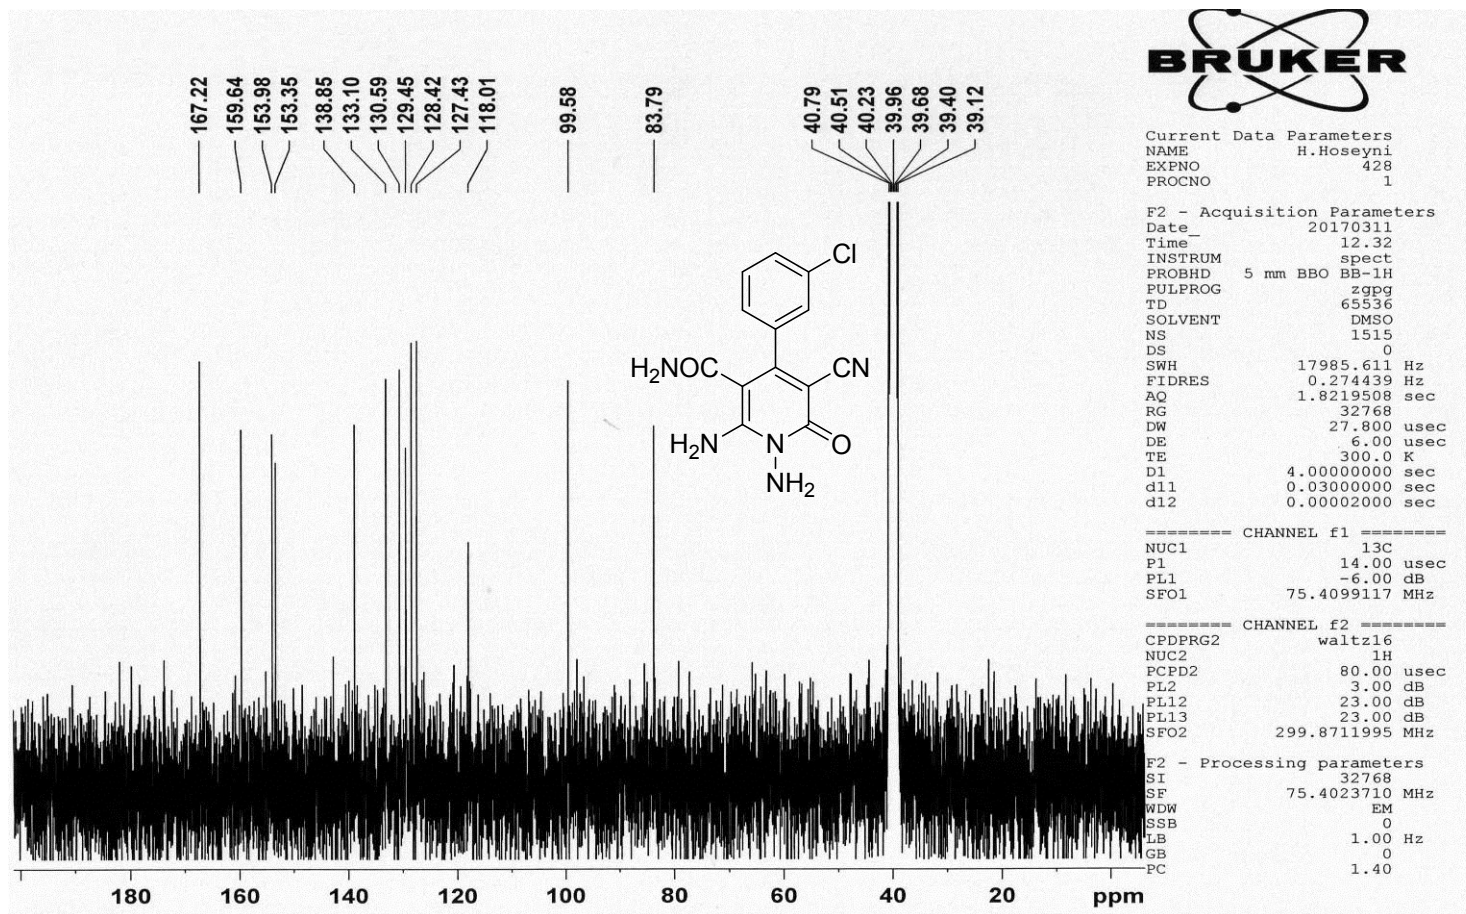 $^{13}\text{C}$  NMR of 6c

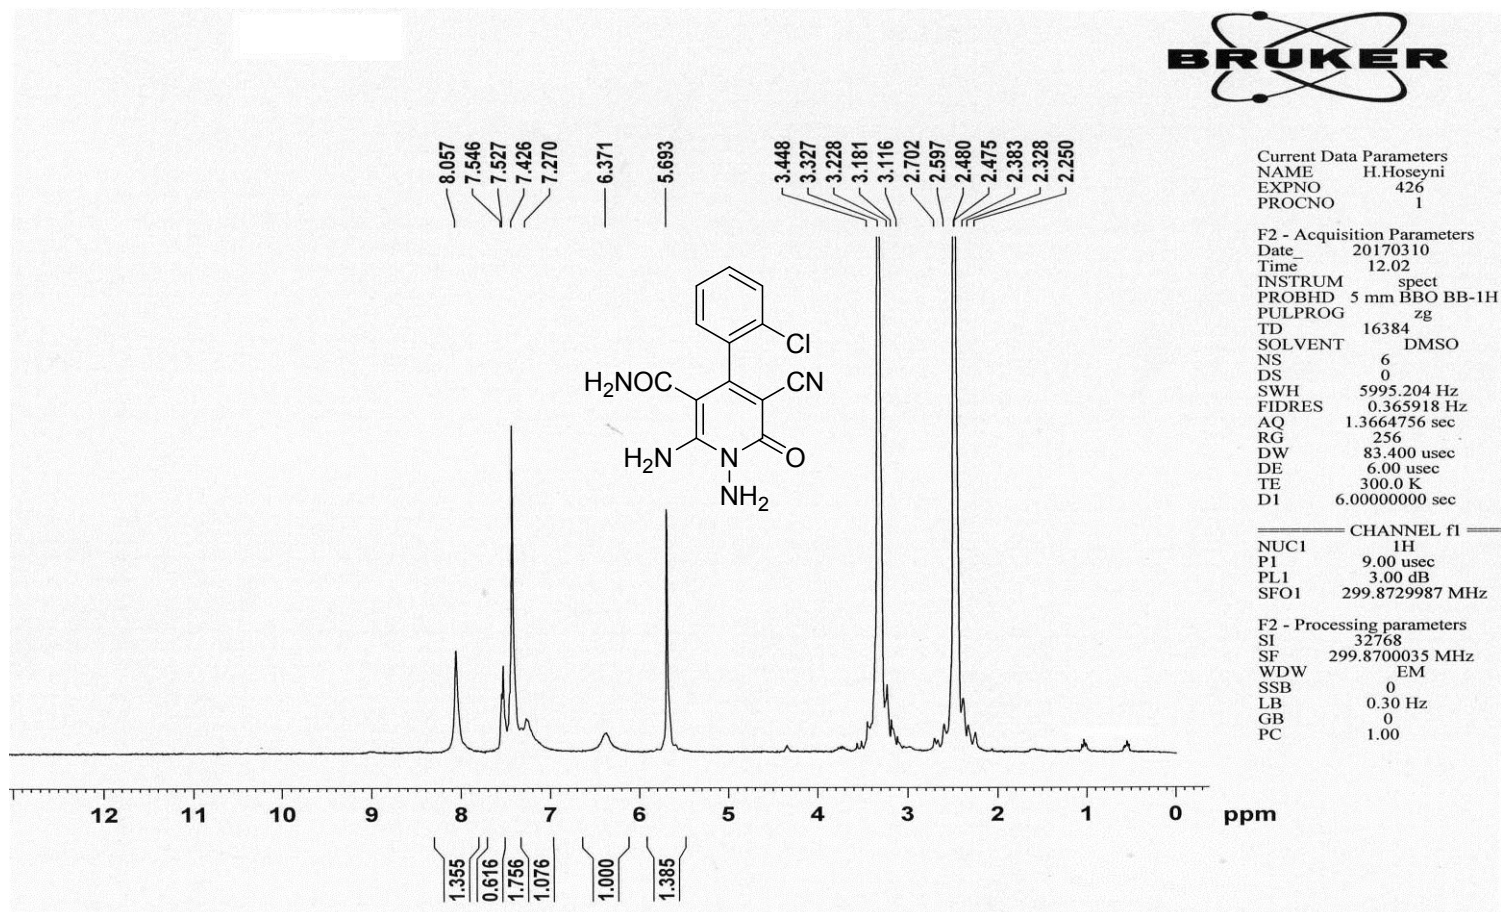

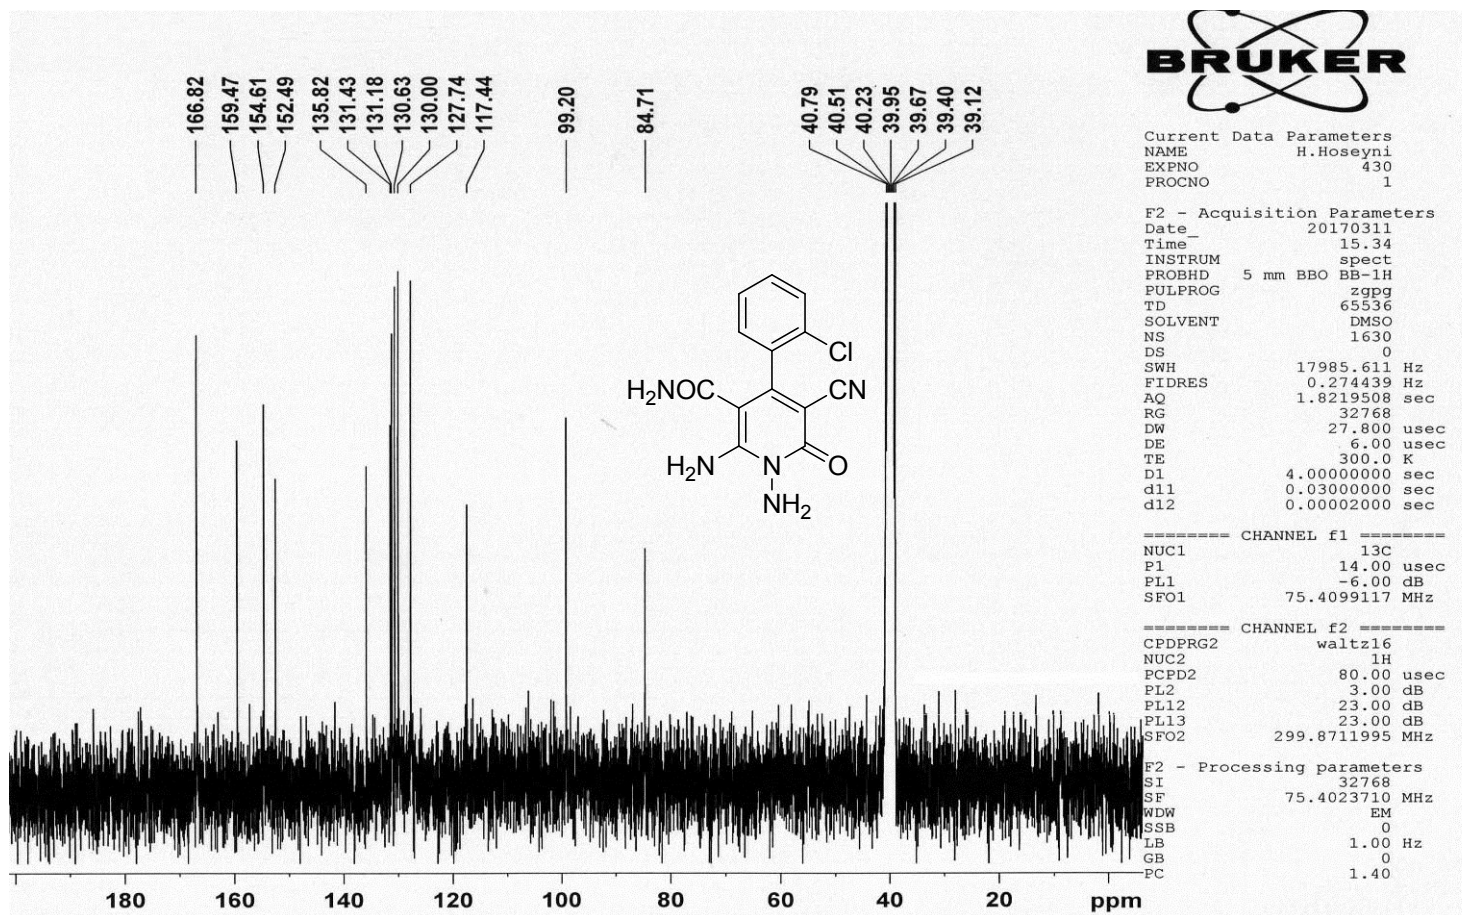

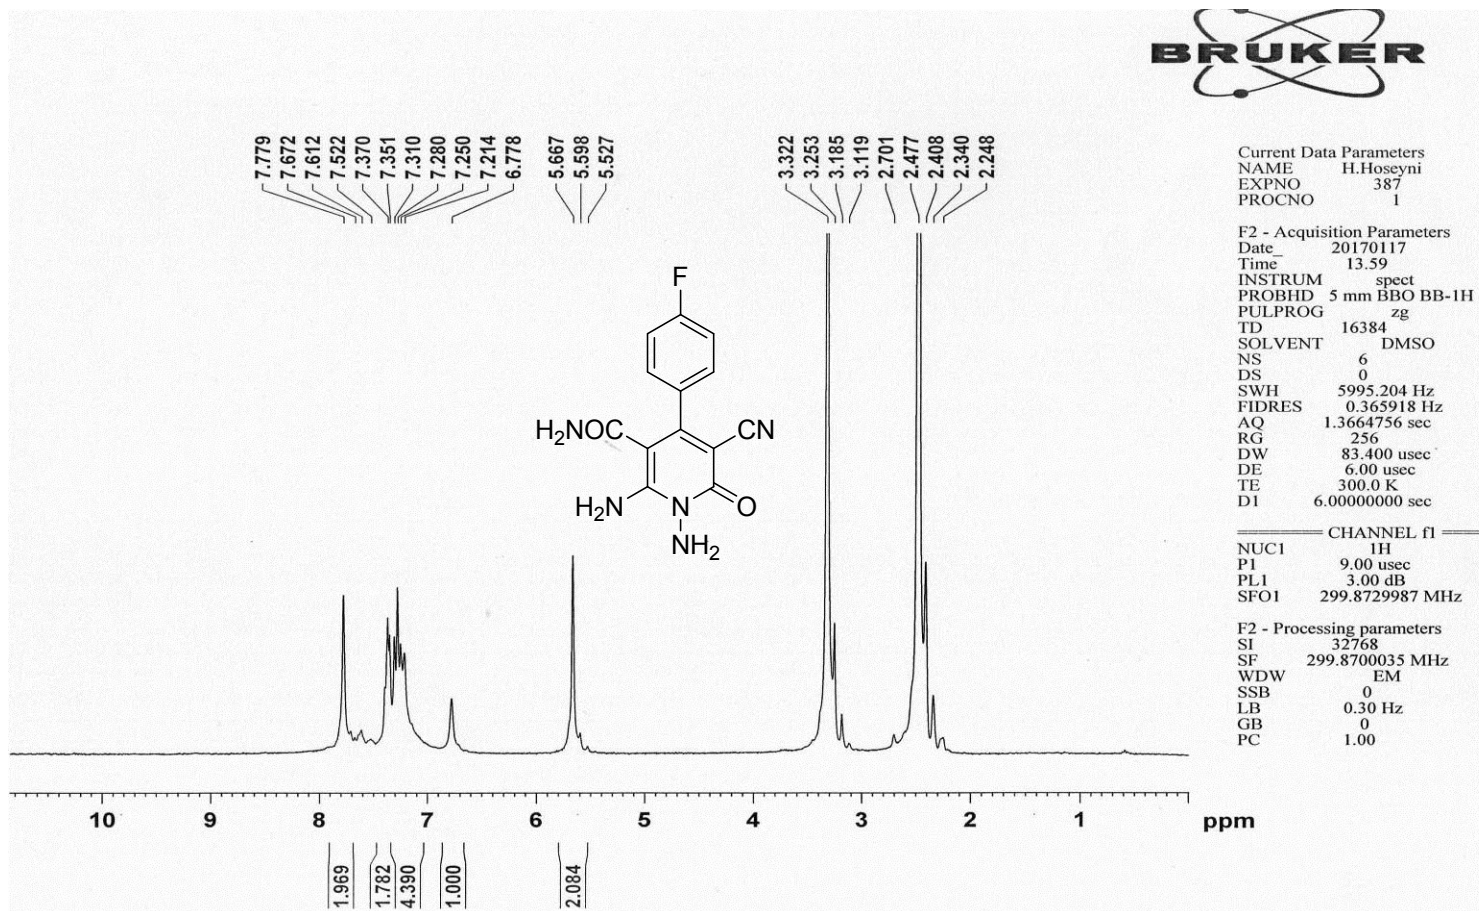<sup>1</sup>H NMR of 6e



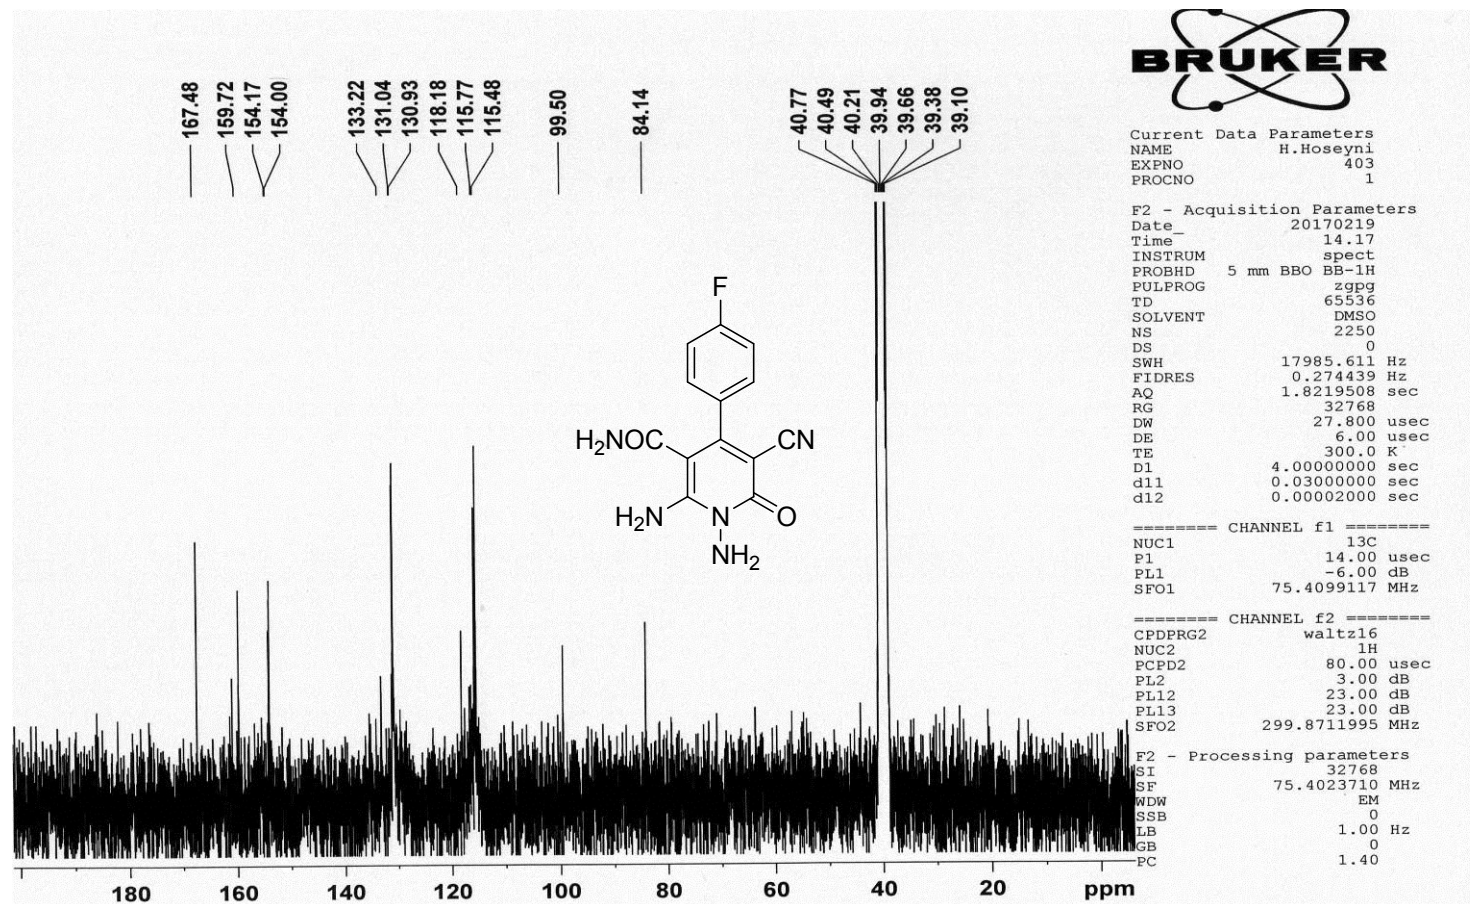<sup>13</sup>C NMR of 6e

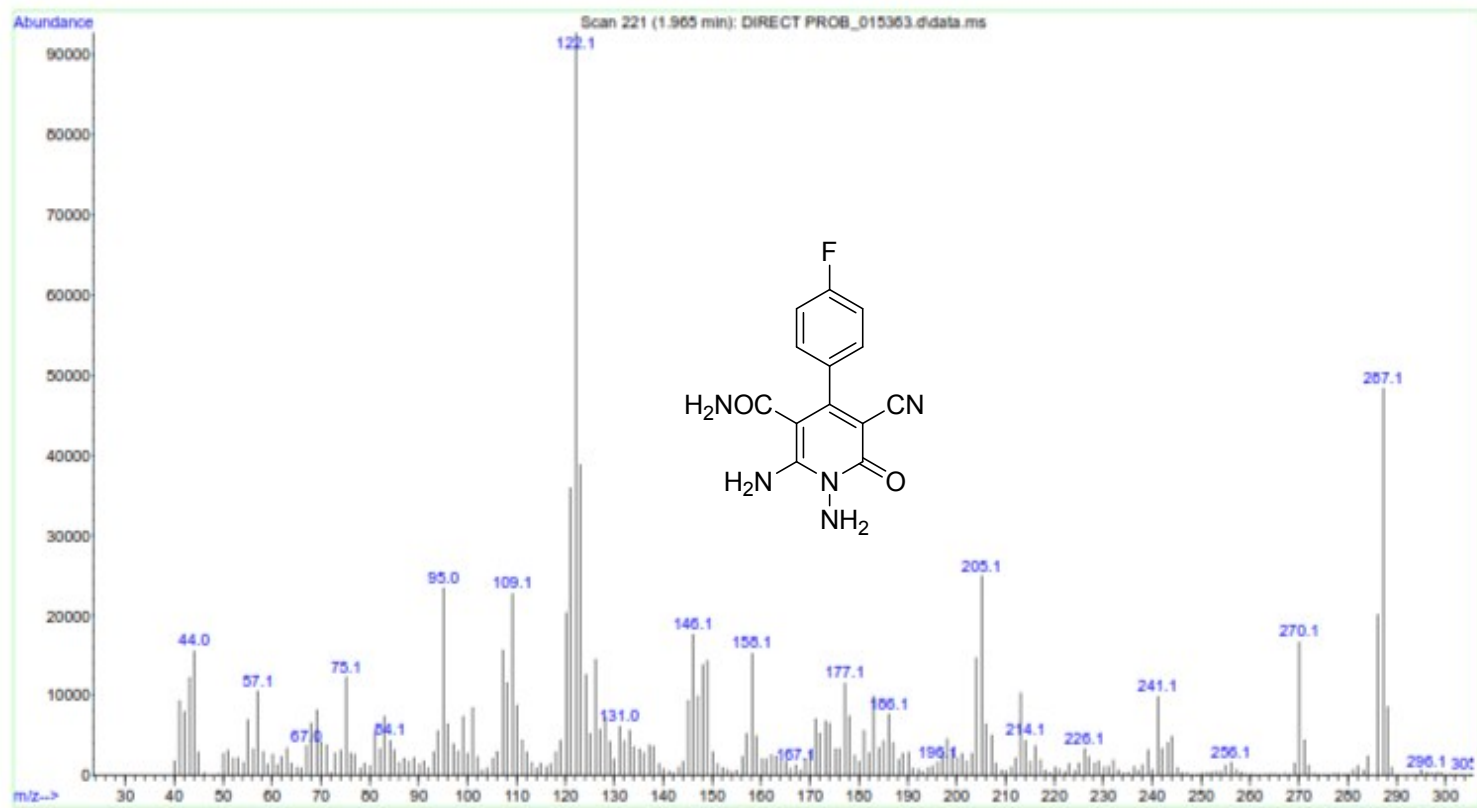

MS of 6e
